# Supplementary material for: Impact of the COVID-19 pandemic on the experience and mental health of university students studying in Canada and the UK: a cross-sectional study
Source: PubMed Central journal article supplement — BMJ Open. 2022 Jan 24;12(1):e050187. doi: 10.1136/bmjopen-2021-050187 (PMC8787844; doi:10.1136/bmjopen-2021-050187), 2022-01-24
Supplement: bmjopen-2021-050187.draft_revisions.pdf [file bmjopen-2021-050187.draft_revisions.pdf]

# BMJ Open

BMJ Open is committed to open peer review. As part of this commitment we make the peer review history of every article we publish publicly available.

When an article is published we post the peer reviewers' comments and the authors' responses online. We also post the versions of the paper that were used during peer review. These are the versions that the peer review comments apply to.

The versions of the paper that follow are the versions that were submitted during the peer review process. They are not the versions of record or the final published versions. They should not be cited or distributed as the published version of this manuscript.

BMJ Open is an open access journal and the full, final, typeset and author-corrected version of record of the manuscript is available on our site with no access controls, subscription charges or pay-per-view fees (<http://bmjopen.bmj.com>).

If you have any questions on BMJ Open's open peer review process please email [info.bmjopen@bmj.com](mailto:info.bmjopen@bmj.com)

# BMJ Open

## Impact of the COVID-19 pandemic on the experience and mental health of university students studying in Canada and the United Kingdom: a cross-sectional study

|                               |                                                                                                                                                                                                                                                                                                                                                                                                                                                                                                                                                                                                                                                                                                                                                                                             |
|-------------------------------|---------------------------------------------------------------------------------------------------------------------------------------------------------------------------------------------------------------------------------------------------------------------------------------------------------------------------------------------------------------------------------------------------------------------------------------------------------------------------------------------------------------------------------------------------------------------------------------------------------------------------------------------------------------------------------------------------------------------------------------------------------------------------------------------|
| Journal:                      | <i>BMJ Open</i>                                                                                                                                                                                                                                                                                                                                                                                                                                                                                                                                                                                                                                                                                                                                                                             |
| Manuscript ID                 | bmjopen-2021-050187                                                                                                                                                                                                                                                                                                                                                                                                                                                                                                                                                                                                                                                                                                                                                                         |
| Article Type:                 | Original research                                                                                                                                                                                                                                                                                                                                                                                                                                                                                                                                                                                                                                                                                                                                                                           |
| Date Submitted by the Author: | 13-Feb-2021                                                                                                                                                                                                                                                                                                                                                                                                                                                                                                                                                                                                                                                                                                                                                                                 |
| Complete List of Authors:     | Appleby, Jennifer A; University of Oxford Medical Sciences Division, Oxford Medical School<br>King, Nathan; Queen's University, Department of Public Health Sciences<br>Saunders, Kate E ; University of Oxford, Department of Psychiatry; Warneford Hospital, Oxford Health NHS Foundation Trust<br>Bast, Anne; University of Oxford Medical Sciences Division, Oxford Medical School<br>Rivera, Daniel; University of Toronto, Department of Pharmacology and Toxicology<br>Byun, Jin; Queen's University Faculty of Health Sciences<br>Cunningham, Simone; Queen's University Department of Psychology<br>Khera, Charandeep; University of Oxford, Department of Psychiatry<br>Duffy, Anne; Queen's University, Department of Psychiatry; University of Oxford, Department of Psychiatry |
| Keywords:                     | COVID-19, PSYCHIATRY, PUBLIC HEALTH                                                                                                                                                                                                                                                                                                                                                                                                                                                                                                                                                                                                                                                                                                                                                         |
|                               |                                                                                                                                                                                                                                                                                                                                                                                                                                                                                                                                                                                                                                                                                                                                                                                             |

SCHOLARONE™  
Manuscripts

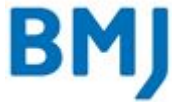

I, the Submitting Author has the right to grant and does grant on behalf of all authors of the Work (as defined in the below author licence), an exclusive licence and/or a non-exclusive licence for contributions from authors who are: i) UK Crown employees; ii) where BMJ has agreed a CC-BY licence shall apply, and/or iii) in accordance with the terms applicable for US Federal Government officers or employees acting as part of their official duties; on a worldwide, perpetual, irrevocable, royalty-free basis to BMJ Publishing Group Ltd ("BMJ") its licensees and where the relevant Journal is co-owned by BMJ to the co-owners of the Journal, to publish the Work in this journal and any other BMJ products and to exploit all rights, as set out in our [licence](#).

The Submitting Author accepts and understands that any supply made under these terms is made by BMJ to the Submitting Author unless you are acting as an employee on behalf of your employer or a postgraduate student of an affiliated institution which is paying any applicable article publishing charge ("APC") for Open Access articles. Where the Submitting Author wishes to make the Work available on an Open Access basis (and intends to pay the relevant APC), the terms of reuse of such Open Access shall be governed by a Creative Commons licence – details of these licences and which [Creative Commons](#) licence will apply to this Work are set out in our licence referred to above.

Other than as permitted in any relevant BMJ Author's Self Archiving Policies, I confirm this Work has not been accepted for publication elsewhere, is not being considered for publication elsewhere and does not duplicate material already published. I confirm all authors consent to publication of this Work and authorise the granting of this licence.

COVID-19 Impact on University Students

# Impact of the COVID-19 pandemic on the experience and mental health of university students studying in Canada and the United Kingdom: a cross-sectional study

Appleby, J.A.<sup>1</sup>, King, N.<sup>2</sup>, Saunders, K.E.A.<sup>3,4</sup>, Bast, A.<sup>1</sup>, Rivera, D.<sup>5</sup>, Byun, J.<sup>6</sup>, Cunningham, S.<sup>7</sup>, Khera, C.K.<sup>3</sup>, and Duffy, A.<sup>3,8\*</sup>

<sup>1</sup>Oxford Medical School, Medical Sciences Division, University of Oxford, Oxford, United Kingdom

<sup>2</sup>Department of Public Health Sciences, Queen's University, Kingston, ON, Canada.

<sup>3</sup>Department of Psychiatry, University of Oxford, Oxford, United Kingdom.

<sup>4</sup>Oxford Health NHS Foundation Trust, Warneford Hospital Oxford OX3 7JX

<sup>5</sup>Department of Pharmacology and Toxicology, University of Toronto, Toronto, ON, Canada;

<sup>6</sup>Faculty of Health Sciences, Queen's University, Kingston, ON, Canada.

<sup>7</sup>Department of Psychology, Queen's University, Kingston, ON, Canada.

<sup>8</sup>Department of Psychiatry, Division of Student Mental Health, Queen's University, Kingston, ON, Canada.

## Correspondence:

Professor Anne Duffy  
anne.duffy@queensu.ca

**Keywords:** COVID-19, psychiatry, public health

Word count: 3882

## Abstract

**Objectives:** To explore the impact of the COVID-19 pandemic on the experiences and mental health of university students.

**Design:** A cross-sectional study consisting of an electronic survey about students' experiences and concerns during the pandemic and the associated impact.

**Setting:** Queen's university in Canada and the University of Oxford in the UK

**Participants:** Undergraduate students at Queen's university and first year undergraduate students at the University of Oxford were invited to complete the COVID supplement survey. 3013 Queen's students and 337 Oxford students completed the survey with no missing data on the variables of interest.

**Results:** Females reported greater adherence to government recommendations to prevent the spread of COVID-19 and were more likely to experience associated lifestyle changes than

## COVID-19 Impact on University Students

males. Students concerns were wide-ranging including those related to their learning experience, finances, and future academic and career prospects. A sizeable proportion of students also reported that the pandemic negatively impacted their plans to continue at university (29.4% of Queen's students, 14.2% of Oxford students), and disrupted activities important to their mental well-being. Younger students were more likely to worry about university attendance, while older students were more likely to report concerns about career prospects.

**Conclusions:** Overall, findings underscore the importance of addressing areas of student concern and the aspects of student life negatively impacted by the pandemic in order to maintain student well-being and support a successful university experience.

### **Article Summary: Strengths and limitations of this study**

- The first study to compare the impact of the COVID-19 pandemic on university students across different countries.
- Responses were obtained from large, diverse samples of university students.
- Validated measures were used to assess the impact of the pandemic on students.
- A low response rate was obtained from the Queen's University sample.
- Participants were surveyed early in the pandemic, and the impact on students may change over time.

## **1 Introduction**

In late 2019, the novel Coronavirus (COVID-19) was detected in Wuhan, China, causing disease ranging from asymptomatic infection to life-threatening respiratory compromise.[1] The restrictions imposed to limit viral transmission and the direct impact of the virus have profoundly affected daily life and well-being, with heightened anxiety and reduced access to usual coping mechanisms such as exercise, socialisation, and leisure activities.[2]

University students are a subgroup of the population particularly affected by COVID-19. Campus life has dramatically changed with remote teaching and social distancing measures implemented across institutions worldwide.[3] In addition to the changes to daily living experienced by the general population, students have experienced disruption to their learning, assessment and schedules, and the cancellation of enriched learning opportunities such as field trips, laboratory courses, and learning exchanges. Additionally, the pandemic may affect future educational opportunities, job prospects, and financial stability.

The pandemic and its aftermath will likely have lasting effects on both students and universities. Therefore, there is a pressing need for the collection of reliable data to assess the impact of the pandemic on student well-being and academic outcomes. This would improve our understanding of student experiences and concerns, informing institutions' approaches to addressing these.

In this study, we aimed to explore university student experiences and concerns during the COVID-19 pandemic, including worries related to the pandemic and the associated impact on education, daily life, career prospects, and mental health support. We leveraged an ongoing longitudinal survey study of undergraduate students attending Queen's University in Canada and the University of Oxford in the UK.[4-5]

## COVID-19 Impact on University Students

### 2 Methods

COVID-specific measures were added to the ongoing U-Flourish Student Well-Being and Academic Success survey,[6] which invites first-year university students at Queen's (Canada) and Oxford (UK) to complete electronic surveys at the beginning and end of each academic year. The surveys ask about risk and protective factors for well-being and mental health using validated measures. COVID-related questions were added to the U-Flourish follow-up survey for participating first-year Oxford students (May 2020) and sent out as a supplementary survey to all registered Queen's undergraduate students (July 2020).

#### 2.1 Study Variables

##### 2.1.1 Demographic Characteristics.

Age in years and gender were self-reported and international student status, and program and year of study were obtained from university administrative data.

##### 2.1.2 COVID-19 related measures.

Participants were asked to describe their approach to self-isolation during the pandemic by selecting all options that applied from a list of nine options, grouped into: (1) No change (i.e., "I have lived my life as normal"), (2) Minor change, but not self-isolation (e.g., social distancing, working from home), and (3) Self-isolation (i.e., staying at home and avoiding contact with people outside of your household). Participants rated their knowledge level on COVID-19 from "1 – Very Poor" to "7- Very Good", and whether they have been following government recommendations from "1 – Not at all" to "7 – Very much so".

Anxiety surrounding the pandemic was assessed using the COVID-19 Pandemic Anxiety Scale.[7] A series of nine statements asked, how serious an issue do you think COVID-19 is, and how worried are you about the following: catching COVID-19, friends and family catching COVID-19, leaving the house, infecting others, having enough food and other essential items, missing university, and the impact on your finances and long-term academic and job prospects. Each statement was rated on a five-point scale according to level of agreement, re-categorised into 'Disagree' (1-2), 'Neither disagree or agree' (3), and 'Agree' (4-5).

To gauge the impact of COVID-19 on student life, students were asked about the impact of the pandemic on studies and learning opportunities, future academic/professional prospects, lifestyle, relationships and connectedness, and for those in need, access to mental health support. Participants rated the impact of the pandemic and associated social distancing on a five-point scale from 1= Very negative to 5= Very positive (categorised into 'Negative', 'Neither', or 'Positive'). Participants were asked if any mental health support they receive had been stopped, postponed or negatively affected due to the pandemic.

Finally, participants were asked "Are there any other significant impacts related to the COVID-19 pandemic on your mental health, wellbeing, or education that you would like to comment on?"

#### 2.2 Statistical Analysis

The primary analysis utilised data from the Queen's COVID-19 survey. Responses to the Pandemic Anxiety Scale and questions assessing the impact of the pandemic and associated social distancing were examined in the Oxford sample in an exploratory manner to compare

## COVID-19 Impact on University Students

between institutions and countries. Samples were restricted to participants with complete data on the variables of interest. Analyses were conducted using RStudio.[8] Descriptive statistics were used to describe the sample, and responses to the Pandemic Anxiety Scale and COVID-19 impact items overall and by gender, age group and year of study. Students identifying as other than 'male' or 'female' were not included in the gender-stratified analyses because of small numbers (n= 34/3013). Differences in proportions between strata were examined using chi-square tests. The difference in average knowledge levels of COVID-19 between males and females was examined using a t-test.

Qualitative data from the Queen's and Oxford surveys were extracted from free text responses. Qualitative analysis used a framework technique.[9-10] Participant data were interpreted and summarized. Codes comprised of similar information were merged leading to a framework of specific phenomena that appeared increasingly likely to reflect the participant's experience. The study team met regularly to discuss the findings and refine the emerging framework. To reduce researcher bias, the team analysing the qualitative data were not made aware of the quantitative findings until the framework had been agreed.

The STROBE cross-sectional reporting guidelines were used in the reporting of this study.[11]

### 2.3 Patient and public involvement

The ongoing UFlourish survey is a student-informed research effort.[6] Peer health educators (PHEs) are included at all stages of the research from design to implementation and we will include the student perspective in the interpretation and dissemination of findings.

## 3 Results

### 3.1 Description of the sample

The response rate among Queen's undergraduate students was 13.5% (n= 3,452). In this report, we describe the responses of 3,013 Queen's students with complete data on the variables of interest (Table 1) The Queen's student participant sample was broadly representative of the eligible student population by year and program of study, full versus part-time, and international versus domestic status. However, more students in the sample identified as female (70.1% vs. 57.7%,  $\chi^2 p<.01$ ) and were younger than 19 years old (40.6% vs 35.0%,  $\chi^2 p<.01$ ) compared to the university database. The average age of the study sample was 19.6 (SD= 2.8) years old, and most students were domestic (92.5%). Students were most likely to be preparing to begin their first year (25.4%) or finishing first year (23.9%) at the time of survey completion, and the most common programs of study were Arts, Humanities, and Social Sciences (33.8%), Life and Physical Sciences (27.4%), and Engineering and Applied Science (20.2%). The response rate among the first year Oxford University student cohort was 45.0% (n=356). In this report we describe the responses of 337 students with complete data on the Pandemic Anxiety Scale and the impact of COVID-19 items. The average age of student respondents was 18.4 years old, and the majority identified as female (61.7%). In comparison, Queen's first-year students were an average age of 18.6 (SD=2.4) years and 72.1% identified as female.

### 3.2 Knowledge about COVID-19 and associated experiences

Overall, Queen's students rated their knowledge level on COVID-19 as good to very good (Mean= 5.0 out of 7, SD=1.1). Most reported following government recommendations (90%

## COVID-19 Impact on University Students

≥5 out of 7), and female students were more likely than males to report following recommendations (91.3% vs 86.7%,  $p < .01$ ). Most students (61.9%) reported self-isolating, defined in this survey as “staying at home and avoiding contact with people outside of your household” (Table 1). A minority reported having continued to live their life as normal ( $n = 125$  (4.0%)). Female students were more likely to report self-isolating (63.9% vs 57.0%,  $\chi^2 p < 0.05$ ), and males were more likely to report no change in behaviour (8.0% vs 2.3%,  $\chi^2 p < 0.05$ ).

**Table 1.** Description of the Queen’s (Canadian) summer 2020 survey sample, including student levels of knowledge on COVID-19, following of recommendations, and approaches to self-isolation

|                                    | N    | (%)    |
|------------------------------------|------|--------|
| Age                                |      |        |
| ≤18                                | 1222 | (40.6) |
| 19-20                              | 1062 | (35.3) |
| ≥21                                | 729  | (24.2) |
| Gender                             |      |        |
| Female                             | 2111 | (70.1) |
| Male                               | 868  | (28.8) |
| Other                              | 34   | (1.13) |
| Program of Study                   |      |        |
| Arts, Humanities & Social Sciences | 1019 | (33.8) |
| Life and Physical Sciences         | 824  | (27.4) |
| Engineering and Applied Science    | 607  | (20.2) |
| Business                           | 166  | (5.5)  |
| Computing                          | 93   | (3.1)  |
| Nursing                            | 92   | (3.1)  |
| Health Sciences                    | 64   | (2.1)  |
| Law                                | 74   | (2.5)  |
| Medicine                           | 74   | (2.5)  |
| Year of Study                      |      |        |
| Incoming                           | 765  | (25.4) |
| First                              | 721  | (23.9) |
| Second                             | 517  | (17.2) |
| Third                              | 536  | (17.8) |
| Fourth                             | 369  | (12.3) |
| Fifth or Sixth                     | 105  | (3.5)  |
| International/Domestic Status      |      |        |
| Domestic                           | 2788 | (92.5) |
| International                      | 225  | (7.5)  |
| Knowledge level on COVID-19        |      |        |
| 1 (Very poor) to 3                 | 209  | (6.9)  |
| 4                                  | 664  | (22.0) |
| 5 to 7 (Very good)                 | 2140 | (71.0) |
| Following COVID-19 recommendations |      |        |
| 1 (Not at all) to 3                | 91   | (3.0)  |
| 4                                  | 203  | (6.7)  |
| 5 to 7 (Very much so)              | 2719 | (90.2) |
| Approach to self-isolation         |      |        |
| No change/ life as usual           | 125  | (4.0)  |
| Minor change but not isolation     | 1075 | (34.2) |
| Self-isolation                     | 1946 | (61.9) |



## COVID-19 Impact on University Students

### 3.3 COVID-19 related worries

Responses to the COVID-19 Pandemic Anxiety Scale (Figure 1) showed that almost all Queen's students agreed that COVID-19 is a serious issue (93.7%). This was consistent across genders and age groups (Supplemental Table 1). Although many students reported concerns about catching COVID-19 (48.1%), a greater proportion were worried about infecting others (64.0%), or friends and family catching it (74.9%). Few students reported being afraid to leave the house (14.7%), and the majority were not worried about access to food and essential items (87.6%). These trends were consistent across gender and age groups and were consistent with responses from Oxford students (Supplemental Figure 1).

Most students reported concerns about missing university (67.8%), with younger students most worried (age 18 or younger= 80.4%, age 19-20= 72.1%, and age 21 or older= 47.7%;  $\chi^2$   $p < 0.01$ ). Many students reported worries about their finances (58.4%), and long-term academic and job prospects (78.9%). Both trends were consistent across genders and age groups (Supplemental Table 1). Oxford student responses to the Pandemic Anxiety Scale were largely consistent with Queen's student responses, except for a smaller percentage of Oxford students reporting concerns about finances (26.7%) and long-term academic and job prospects (50.1%, Supplemental Figure 1).

### 3.4 Impact of COVID-19

#### 3.4.1 Effects on university and studies

Queen's students commonly reported that the pandemic had negatively impacted their studies (69.9%) (Figure 1). While most students reported neither a positive nor negative impact on their plans to continue at university (61.5%), a notable proportion reported a negative impact (29.4%). Both a positive (22.8%) and negative (27.8%) impact on grades was reported. Most students perceived online learning negatively (61.2%), and reported a negative impact of the pandemic on their prospects for internships, exchanges, and other enriched learning experiences (68.0%). These findings were consistent across gender, age group, and year of study (Supplemental Table 2), and largely consistent with the Oxford student responses. However, a smaller proportion of Oxford students reported a negative impact on their plans to continue at university (14.2%), and negative perceptions of online learning (30.9%; Supplemental Figure 1).

#### 3.4.2 Employment and finances

Most students at Queen's (69.3%) and Oxford (72.4%) reported a negative impact on their prospects for summer employment. A third of Queen's students reported a negative impact on their prospects to achieve their career aspirations (37.8%). Additionally, students in later years of study reported a more negative impact on their career aspirations ( $\chi^2$   $p < 0.05$ ). Most students reported a negative impact on their finances (51.8%), and few reported a negative impact on their ability to access food and essentials (10.7%).

#### 3.4.3 Exercise, leisure and social life

Queen's students reported both a negative (42.9%) and positive (30.3%) impact on their ability to exercise, but most reported a negative impact on their hobbies and leisure activities (56.4%). These findings were consistent with the Oxford data (Supplemental Figure 1). Most students reported a negative impact on their social life (74.0%). While many students reported neither a positive nor negative impact on their relationships with family members (41.6%), several reported a negative impact (24.9%).

## COVID-19 Impact on University Students

### 3.4.4 Receipt of Mental Health Support

Among those Queen's students who receive mental health support (n=1,256), most reported this support was unaffected by COVID-19 (66.9%). However, significantly more females reported their support being negatively affected than males (37.4% of females, 18.2% of males,  $\chi^2 p < 0.005$ ). There was no significant difference in the proportions of students reporting a negative impact according to age or year of study.

### 3.5 Common Pandemic Impact Themes – Qualitative analysis

Free text responses to an open-ended question asking Queen's (n= 815) and Oxford (n= 60) students to describe other impacts related to COVID-19 were analysed for major themes. See Supplemental Materials Appendix A1 for representative quotes.

#### 3.5.1 Negative impact due to social isolation

Many students (56.0% Queen's, 33.3% Oxford) described social isolation to be associated with feelings of anxiety, loneliness, and restlessness due to loss of in-person contact with peers, friends, and significant others. Many students described their friends as key supports, and that reduced contact worsened their well-being: "Forced separation from part of my support system has had a negative impact on both my academics and mental health". Interestingly, students reported that isolation with roommates or family members, with whom they had already-strained relationships, increased stress and caused feelings of being trapped in a negative home environment which worsened mental health: "Having no break from my fairly stressful home situation has not been great for my mental health". Overall, reduced interaction with support networks and forced confinement with others increased stress.

#### 3.5.2 Challenging academic and institutional changes

Students described challenges in rapidly adapting to new learning methods (32.1% of Queen's students, 23.3% of Oxford students). Online learning was reported as difficult or less effective than in-person instruction due to lack of quiet study spaces, blurred school and home boundaries, and distance from peers: "Getting myself into an exam or essay-writing mindset at home is much harder than I thought it would be". Students reported difficulty coping with high work demands outside their usual surroundings, isolated from peers during a stressful, uncertain time: "I am finding it hard to keep a balanced perspective on work and assignments working at home by myself and not being around friends". Concerns about learning experiences and future preparedness stemmed from the loss of practical course components, cancellation of professional placements, and reduced access to specialized facilities. The cancellation of key milestones (orientation week, student sports and clubs) contributed to worries about personal development and the quality of students' social experience at university. Responses concerning institutional pandemic responses were mixed, including understanding given the circumstances, and frustration with decisions regarding tuition, campus closure, and a perceived lack of support.

#### 3.5.3 Financial Challenges

Some Queen's students (11.4%), but no Oxford students, expressed additional, specific financial concerns. These included frustration and anxiety regarding reduced income due to fewer career opportunities and employment termination, and expenses due to continued student housing and university tuition fees. Reduced income combined with maintained expenses amplified financial stress.

## COVID-19 Impact on University Students

### 3.5.4 Disruptions to support services and means of coping

A small proportion of students at both universities (5.6% Queen's, 5.0% Oxford) described disrupted access to health and support services, including difficulties accessing prescription medication and obtaining healthcare appointments and in-person counselling. Fear of accessing services in-person due to risk of COVID-19 exposure was reported as impeding usual care: "Too afraid to visit hospital for routine problems". Students described reluctance to use online services, outlining difficulties adapting to or navigating them. Additionally, reduced engagement in leisure or physical group activities usually key to managing stress and protective for mental health was reported as negatively impacting the ability to cope: "It has removed my ability to train for my sport which was a crucial part of my weekly structure 6 days a week, and was critical in my being able to maintain my mental health and work/study productively".

## 4 Discussion

The COVID-19 pandemic has caused major disruption to university and has had far-reaching impacts on students' daily lives, well-being and perception of their future. Our study explored undergraduate student experiences and worries in the early part of the pandemic, and the associated impact on their education, daily life, career prospects and mental health support. To our knowledge, this is the first study to compare the impact of the pandemic on university students across different countries. We hope that this information can be used to support students during and beyond the pandemic.

Nearly all students across both universities agreed that COVID-19 is a serious issue, but female students at Queen's were more likely than males to report following government recommendations and adapting their lifestyle. This may be partly due to increased anxiety among female students. Screening positive for anxiety and depression has been found to be higher in female university students and in females of similar age in the general population when compared to males.[4,5,12] Moreover, females appear more susceptible to anxiety and depression surrounding COVID-19,[13-15] and are more likely to follow COVID-19-related public health guidelines.[16] However, we found no significant differences between male and female students in terms of worries and concerns around the pandemic using the Pandemic Anxiety Scale.

Younger students were significantly more likely to report concerns about missing university than older students, who were more likely to be worried about the impact on their career prospects. This may reflect different priorities: missing university is a more immediate concern than applying for jobs for younger students who are years away from graduating. In contrast, older students may be more concerned with the prospect of leaving university at a time where workers are being furloughed or made redundant, and employment rates are falling.[17-18] This is supported by a consistent concern about long-term academic and job prospects across age groups, and by our qualitative analysis. Queen's, but not Oxford students discussed concerns surrounding employment, which may reflect the presence of older students in the Queen's sample. In summary, students at different stages of their studies require targeted approaches to address their immediate concerns regarding future academic or career prospects.

While students expressed worries about catching COVID-19, many more were worried about infecting others, or friends and family contracting it. Most university students are relatively young with few co-morbidities and therefore at low-risk for severe COVID-19 disease but

## COVID-19 Impact on University Students

1  
2  
3 may have family members at higher risk of developing severe disease due to their age and co-  
4 morbidity.[19] This is an important consideration for decisions regarding bringing students  
5 to campus, as students may worry about returning home, either during holidays or following a  
6 rise in infections, and potentially exposing family or friends in high-risk groups to COVID-  
7 19. The UK government introduced plans for university students to receive COVID-19 tests  
8 before returning home for Christmas, which may have allayed students' worries about  
9 exposing family members to COVID-19, but was challenging for students who tested positive  
10 and were required to isolate.  
11  
12

13 Several students at Queen's and Oxford expressed concern about the impact of the pandemic  
14 on their finances. We noted that a smaller proportion of Oxford students reported these  
15 concerns compared to Queen's students, which may be associated with differences in year of  
16 study and concerns about employment after graduation. Our qualitative analysis supported  
17 the contribution of mandatory continued payment for university accommodation and tuition  
18 with reduced perceived value, and loss of income to financial anxiety.[20] Additionally,  
19 many students rely on money from family members, whose jobs and income may have been  
20 negatively affected by the pandemic, or their ability to work part-time or seasonally which  
21 may have been similarly affected by COVID-19. Previous studies have indicated student  
22 concern about finances during COVID-19, particularly those remaining in student residences  
23 during lockdown.[21]  
24  
25  
26

27 Most students indicated that COVID-19 negatively impacted their studies, as may be  
28 expected due to shifts to online learning or full course suspension. Unfortunately, negative  
29 perceptions of online learning suggest dissatisfaction with alternative teaching methods,  
30 which may have been worsened by unchanged tuition fees and how quickly these changes  
31 were introduced. However, most Queen's students reported little impact on their grades,  
32 suggesting disruption is being accounted for in assessments, that students and/or professors  
33 are adapting adequately to maintain grades, and/or it is too early to measure the impact on  
34 academic performance. While most students reported no impact on their plans to continue  
35 university, nearly 30% of Queen's students and 15% of Oxford students reported a negative  
36 impact. This may suggest students are more likely to discontinue their studies as a result of  
37 the pandemic, and would have significant repercussions for universities' income. Most  
38 students also reported a negative impact on their prospects for summer internships,  
39 employment, learning exchanges, and other academic pursuits. Explanations include travel  
40 restrictions, workplace closures, reluctance to employ non-essential workers, social  
41 distancing restrictions, and student concerns regarding exposure to COVID-19. Students'  
42 worries surrounding future academic and career prospects might be related to fewer  
43 opportunities compared to their predecessors, and increased competition on graduation with  
44 less work or academic experience. Reassuringly, most students reported no impact on their  
45 ability to access food and other essentials.  
46  
47  
48  
49

50 Students reported both positive and negative impacts on exercise. Disruption to routines,  
51 closure of gyms or lack of university sports societies cited in our qualitative analysis may  
52 account for the negative impact. More time to exercise, availability of online classes, and  
53 more space for exercise at home may account for the positive impact. Most students reported  
54 a negative impact on their participation in hobbies and leisure activities, and unsurprisingly,  
55 on their social life. The combination of these factors suggests a significant impact of COVID-  
56 19 on student mental well-being, given the importance of recreation, exercise and social  
57 connectedness to the support of mental health.[13,22]  
58  
59  
60

## COVID-19 Impact on University Students

Select populations, that may not be readily identified as requiring tailored support, reported unique challenges. Students with dependents described challenges balancing their studies and caring responsibilities due to reduced childcare services and closure of schools. International students reported inability to travel home to reunite with family and friends, and anxiety associated with remaining in a foreign country during a pandemic. Affordability of remaining away from home, high tuition costs, and lack of financial support were concerns for these students.

Strengths of our study include providing timely, important information on a largely unknown and highly relevant topic: the impact of a global pandemic on the lives and experiences of university students. Responses from large, diverse samples of university students were utilized and allowed comparison between countries and institutions. Our findings build on those of previous studies that have focused specifically on mental health impacts,[15,23-25] or been limited to medical students or much smaller samples.[26-31] We assessed the impact of COVID-19 using a validated Pandemic Anxiety Scale. One of the main study limitations was the low response rate in the Queen's sample, which likely reflects the timing of the survey during summer break without a preceding student engagement campaign. Nonetheless, the student sample appeared broadly representative of the Queen's undergraduate population in terms of demographics and program of study. The Oxford data pertains only to first-year students. However, increased surveying of younger students may be more informative for higher education policies, as these students are more likely to be studying at university when these policies are enacted. In this analysis, students at both universities were surveyed early in the pandemic, and worries and impacts may change over the course of the pandemic. Therefore, we will repeatedly survey students at both universities to better understand student concerns and the impact of the pandemic on student experiences and well-being over time. We hope that this information will be helpful to inform universities as to how best to address student priority learning and well-being needs.

### 5 Conclusion

The COVID-19 pandemic has had wide-ranging impacts on university student experience and mental health. Our findings support that undergraduate students have concerns regarding disruptions to university studies, the inadequacies of online learning as a substitute for in-person learning, and their finances and future academic and career prospects. A concerning number of students reported the possibility of discontinuing their studies due to the pandemic. Many students reported negative impacts of COVID-19 on protective factors for well-being, including socializing, exercise, hobbies and leisure activities, family relationships, and mental health support. Higher education institutions must prepare to address students' concerns in the short term during the pandemic, and provide ongoing support for students in the aftermath of COVID-19 as the long-term impacts become apparent.

## COVID-19 Impact on University Students

### Figure legends

Figure 1: Queen's university students' responses to the Pandemic Anxiety Scale items (Panel A), and items relating to the impact that COVID-19 and associated social distancing have had on various aspects of their lives (Panel B).

### Contributors

AD developed the protocol in collaboration with colleagues including KEAS and students including DR, NK and SC. DR led the student engagement campaign at Queen's and SC and AD the survey launch, while CK supervised by AD and KEAS led the engagement and survey launch at Oxford. JA, NK and AD led the quantitative analysis, whilst KEAS, AB, JB and DR the qualitative analysis. All named authors contributed to the writing and reviewed the final manuscript.

### Acknowledgments

We acknowledge the important role of the student volunteers who worked on the Queen's Student Engagement campaign including Mimi Li and Anjalika Khan.

KEAS is supported by the NIHR Oxford Health Biomedical Research Centre (grant BRC-1215-20005).

### Competing interests

KEAS is supported by the NIHR Oxford Health Biomedical Research Centre (grant BRC-1215-20005). The views expressed are those of the authors and not necessarily those of the UK National Health Service, the National Institute for Health Research, or the UK Department of Health.

### Funding

This study was funded by an operating grant from the Canadian Institutes of Health Research (CIHR) PJT 165597.

### Data sharing statement

Deidentified raw data is available upon reasonable request to the corresponding author.

### Ethical approval

Ethical approval was obtained from the Central University Research Ethics Committee in Oxford (R60998 – RE001), and the Queens University Health Sciences and Affiliated Teaching Hospitals Research Ethics Board (HSREB) in Canada (PSIY-669-19). Participants gave informed consent as part of the survey.

## COVID-19 Impact on University Students

## References

- [1]Adhikari, S. P., Meng, S., Wu, Y. J., Mao, Y. P., Ye, R. X., Wang, Q. Z, et al. (2020). Epidemiology, causes, clinical manifestation and diagnosis, prevention and control of coronavirus disease (COVID-19) during the early outbreak period: a scoping review. *Infectious diseases of poverty*, 9(1), 29. <https://doi.org/10.1186/s40249-020-00646-x>
- [2]Pfefferbaum, B., & North, C. (2020). Mental health and the Covid-19 pandemic. *New England Journal of Medicine*, 383(6): 510–12. <https://doi.org/10.1056/nejmp2013466>.
- [3]Crawford, J., Butler-Henderson, K., Rudolph, J., Malkawi, B., Glowatz, M., Magni, P et al. (2020). COVID-19: 20 countries’ higher education intra-period digital pedagogy responses. *Journal of Applied Learning & Teaching*, 3(1). <https://doi.org/10.37074/jalt.2020.3.1.7>
- [4]King, N., Pickett, W., McNevin, S., Bowie, C., Rivera, D., Keown-Stoneman, C., et al. (2020). Mental health need of students at entry to university: Baseline findings from the U-Flourish Student Well-Being and Academic Success Study. *Early Intervention in Psychiatry*, 1–10. <https://doi.org/10.1111/eip.12939>
- [5]Duffy, A., Keown-Stoneman, C., Goodday, S., Horrocks, J., Lowe, M., King, N, et al. (2020). Predictors of mental health and academic outcomes in first-year university students: Identifying prevention and early-intervention targets. *BJPsych open*, 6(3), e46. <https://doi.org/10.1192/bjo.2020.24>
- [6]Goodday SM, Rivera D, Foran H, et al. (2019). U-Flourish university students well-being and academic success longitudinal study: a study protocol. *BMJ Open*, 9:e029854. doi:10.1136/ bmjopen-2019-029854
- [7]McElroy, E., Patalay, P., Moltrecht, B., Shevlin, M., Shum, A., Creswell, C., et al. (2020). Demographic and health factors associated with pandemic anxiety in the context of COVID-19. *British journal of health psychology*, 25(4), 934–944. <https://doi.org/10.1111/bjhp.12470>
- [8]RStudio Team (2020). RStudio: Integrated Development for R. RStudio, PBC, Boston, MA URL <http://www.rstudio.com/>.
- [9]Ritchie, J. & Spencer, L. 1994. Qualitative data analysis for applied policy research by Jane Ritchie and Liz Spencer in A. Bryman and R. G. Burgess [eds.] ‘Analysing qualitative data’, (pp.173-194). London: Routledge.
- [10]Gale, N. K., Heath, G., Cameron, E., Rashid, S. & Redwood, S. (2013). Using the framework method for the analysis of qualitative data in multi-disciplinary health research. *BMC Medical Research Methodology*, 13:117. <https://doi.org/10.1186/1471-2288-13-117>
- [11]von Elm E, Altman DG, Egger M, Pocock SJ, Gotsche PC, Vandenbroucke JP. 2007. The Strengthening the Reporting of Observational Studies in Epidemiology (STROBE) Statement: guidelines for reporting observational studies. *BMJ*, 335 doi: <https://doi.org/10.1136/bmj.39335.541782.AD>

## COVID-19 Impact on University Students

- [12]McManus, S., Bebbington, P. E., Jenkins, R., Morgan, Z., Brown, L., Collinson, D., et al. (2020). Data Resource Profile: Adult Psychiatric Morbidity Survey (APMS). *International journal of epidemiology*, 49(2), 361–362e. <https://doi.org/10.1093/ije/dyz224>
- [13]Xiong, J., Lipsitz, O., Nasri, F., Lui, L., Gill, H., Phan, L., et al. (2020). Impact of COVID-19 pandemic on mental health in the general population: A systematic review. *Journal of affective disorders*, 277, 55–64. <https://doi.org/10.1016/j.jad.2020.08.001>
- [14]Smith, L., Jacob, L., Yakkundi, A., McDermott, D., Armstrong, N. C., Barnett, Y., et al. (2020). Correlates of symptoms of anxiety and depression and mental wellbeing associated with COVID-19: a cross-sectional study of UK-based respondents. *Psychiatry research*, 291, 113138. <https://doi.org/10.1016/j.psychres.2020.113138>
- [15]Elmer, T., K. Mepham, and C. Stadtfeld. 2020. Students under Lockdown: Comparisons of Students' Social Networks and Mental Health before and during the COVID-19 Crisis in Switzerland. *PloS one*, 15 (7): e0236337. <https://doi.org/10.1371/journal.pone.0236337>
- [16]Guzek, D., Skolmowska, D., & Głabska, D. (2020). Analysis of Gender-Dependent Personal Protective Behaviors in a National Sample: Polish Adolescents' COVID-19 Experience (PLACE-19) Study. *International journal of environmental research and public health*, 17(16), 5770. <https://doi.org/10.3390/ijerph17165770>
- [17]Statistics Canada. 2020. Canadian Economic Dashboard and COVID-19 <https://www150.statcan.gc.ca/n1/pub/71-607-x/71-607-x2020009-eng.htm> [Accessed 31st October 2020]
- [18]Office for National Statistics. 2020. Coronavirus (COVID-19) roundup: Economy, business and jobs. <https://www.ons.gov.uk/peoplepopulationandcommunity/healthandsocialcare/conditionsanddiseases/articles/coronaviruscovid19roundupeconomybusinessandjobs/2020-07-02#youngperson> [Accessed 31<sup>st</sup> October 2020]
- [19]Clift, A.K., Coupland, C.A.C., Keogh, R.H., Diaz-Ordaz, K., Williamson, E. (2020). Living risk prediction algorithm (QCOVID) for risk of hospital admission and mortality from coronavirus 19 in adults: national derivation and validation cohort study. *BMJ*, 371, pp. m3731. <https://doi.org/10.1136/bmj.m3731>
- [20]Office for National Statistics. 2020. Labour market overview, UK: October 2020. <https://www.ons.gov.uk/employmentandlabourmarket/peopleinwork/employmentandemployeetypes/bulletins/uklabourmarket/october2020> [Accessed 31st October 2020]
- [21]Husky, M., Kovess-Masfety, V., & Swendsen, J. (2020). Stress and anxiety among university students in France during Covid-19 mandatory confinement. *Compr. Psychiatry* **102**, 152-191. doi: 10.1016/j.comppsy.2020.152191
- [22]Rastegar Kazerooni, A., Amini, M., Tabari, P., & Moosavi, M. (2020). Peer mentoring for medical students during the COVID-19 pandemic via a social media platform. *Medical education*, 54(8), 762–763. <https://doi.org/10.1111/medu.14206>
- [23]Copeland, William E., Ellen McGinnis, Yang Bai, Zoe Adams, Hilary Nardone, Vinay Devadanam, Jeffrey Rettew, and Jim J. Hudziak. 2021. Impact of COVID-19 Pandemic on College Student Mental Health and Wellness. *Journal of the American Academy of Child &*



## COVID-19 Impact on University Students

*Adolescent Psychiatry*, 60 (1): 134-141.e2.

<https://doi.org/https://doi.org/10.1016/j.jaac.2020.08.466>.

[24]Essadek, A., and T. Rabeyron. 2020. Mental Health of French Students during the Covid-19 Pandemic. *Journal of affective disorders*, 277 (December): 392–93. [https://doi.org/S0165-0327\(20\)32648-3](https://doi.org/S0165-0327(20)32648-3)

[25]Wathelet, M., S. Duhem, G. Vaiva, T. Baubet, E. Habran, E. Veerapa, C. Debien, et al. 2020. Factors Associated With Mental Health Disorders Among University Students in France Confined During the COVID-19 Pandemic. *JAMA network open*, 3 (10): e2025591. <https://doi.org/10.1001/jamanetworkopen.2020.25591> [doi].

[26]Alsoufi, A., A. Alsuyihili, A. Msherghi, A. Elhadi, H. Atiyah, A. Ashini, A. Ashwieb, et al. 2020. Impact of the COVID-19 Pandemic on Medical Education: Medical Students' Knowledge, Attitudes, and Practices Regarding Electronic Learning. *PloS one*, 15 (11): e0242905. <https://doi.org/10.1371/journal.pone.0242905> [doi].

[27]Byrnes, Y. M., A. M. Civantos, B. C. Go, T. L. McWilliams, and K. Rajasekaran. 2020. Effect of the COVID-19 Pandemic on Medical Student Career Perceptions: A National Survey Study. *Medical education online*, 25 (1): 1798088. <https://doi.org/10.1080/10872981.2020.1798088> [doi].

[28]Choi, B., L. Jegatheeswaran, A. Minocha, M. Alhilani, M. Nakhoul, and E. Mutengesa. 2020. The Impact of the COVID-19 Pandemic on Final Year Medical Students in the United Kingdom: A National Survey. *BMC medical education*, 20 (1): 206-020-02117–1. <https://doi.org/10.1186/s12909-020-02117-1> [doi].

[29]Keckojevic, A., C. H. Basch, M. Sullivan, and N. K. Davi. 2020. The Impact of the COVID-19 Epidemic on Mental Health of Undergraduate Students in New Jersey, Cross-Sectional Study. *PloS one*, 15 (9): e0239696. <https://doi.org/10.1371/journal.pone.0239696> [doi].

[30]Lyons, Z., H. Wilcox, L. Leung, and O. Dearsley. 2020. COVID-19 and the Mental Well-Being of Australian Medical Students: Impact, Concerns and Coping Strategies Used. *Australasian psychiatry : bulletin of Royal Australian and New Zealand College of Psychiatrists*, 28 (6): 649–52. <https://doi.org/10.1177/1039856220947945> [doi].

[31]Son, C., S. Hegde, A. Smith, X. Wang, and F. Sasangohar. 2020. Effects of COVID-19 on College Students' Mental Health in the United States: Interview Survey Study. *Journal of medical Internet research*, 22 (9): e21279. <https://doi.org/10.2196/21279> [doi].

**A. Reporting of Pandemic Anxiety Scale**

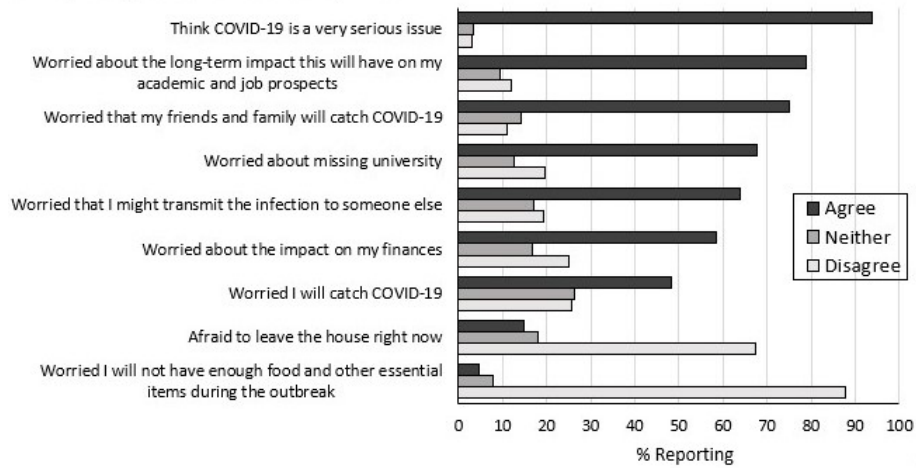

**B. Impact of COVID-19**

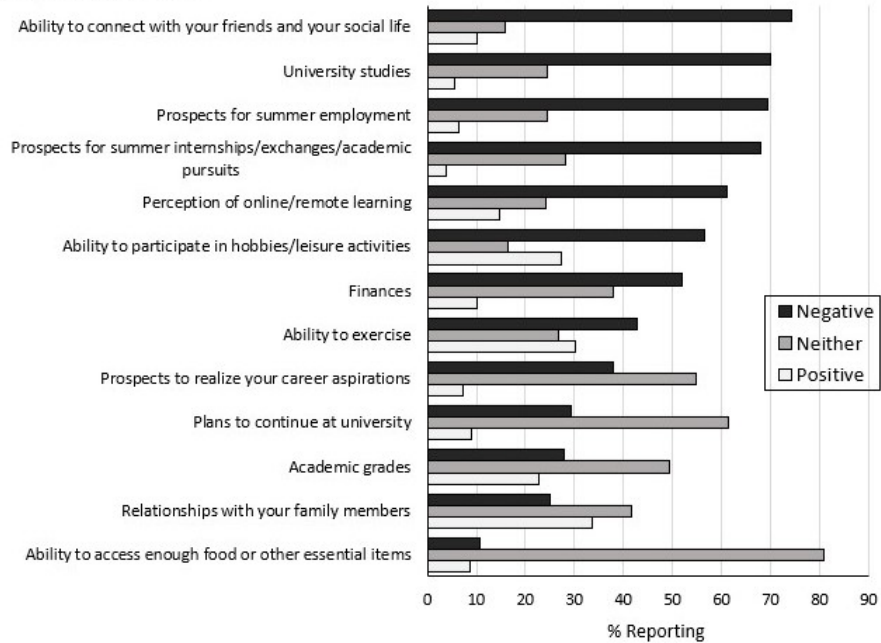

Figure 1: Queen’s university students’ responses to the Pandemic Anxiety Scale items (Panel A), and items relating to the impact that COVID-19 and associated social distancing have had on various aspects of their lives (Panel B).

172x225mm (96 x 96 DPI)

## Supplementary Material

**Supplemental Table 1.** Queen's University percentage ratings on the COVID-19 Pandemic Anxiety Scale items by gender and age

|                                                                                         | Total<br>(n= 3013) | Gender           |                     | p*   | Age Group        |                   |                 | p*   |
|-----------------------------------------------------------------------------------------|--------------------|------------------|---------------------|------|------------------|-------------------|-----------------|------|
|                                                                                         |                    | Male<br>(n= 862) | Female<br>(n= 2100) |      | ≤18<br>(n= 1166) | 19-20<br>(n= 921) | ≥21<br>(n= 926) |      |
| Think COVID-19 is a very serious issue                                                  |                    |                  |                     |      |                  |                   |                 |      |
| Agree                                                                                   | 93.7               | 90.5             | 94.9                | 0.46 | 91.7             | 94.5              | 95.4            | 0.86 |
| Neutral                                                                                 | 3.2                | 4.3              | 2.8                 |      | 4.4              | 2.7               | 2.3             |      |
| Disagree                                                                                | 3.1                | 5.2              | 2.3                 |      | 3.9              | 2.8               | 2.4             |      |
| Worried that I will catch COVID-19                                                      |                    |                  |                     |      |                  |                   |                 |      |
| Agree                                                                                   | 48.1               | 38.2             | 52.1                | 0.10 | 43.4             | 50.1              | 51.9            | 0.76 |
| Neutral                                                                                 | 26.3               | 28.1             | 25.6                |      | 28.9             | 23.8              | 25.4            |      |
| Disagree                                                                                | 25.7               | 33.8             | 22.3                |      | 27.7             | 26.2              | 22.7            |      |
| Worried friends and family will catch COVID-19                                          |                    |                  |                     |      |                  |                   |                 |      |
| Agree                                                                                   | 74.9               | 67.5             | 78.1                | 0.18 | 68.3             | 76.8              | 81.5            | 0.28 |
| Neutral                                                                                 | 14.1               | 16.0             | 13.2                |      | 17.2             | 13.0              | 11.2            |      |
| Disagree                                                                                | 11.0               | 16.5             | 8.7                 |      | 14.6             | 10.2              | 7.2             |      |
| I am afraid to leave the house right now                                                |                    |                  |                     |      |                  |                   |                 |      |
| Agree                                                                                   | 14.7               | 9.3              | 16.6                | 0.17 | 12.3             | 15.1              | 17.2            | 0.89 |
| Neutral                                                                                 | 18.0               | 15.1             | 19.4                |      | 17.2             | 18.8              | 18.3            |      |
| Disagree                                                                                | 67.3               | 75.6             | 64.0                |      | 70.4             | 66.1              | 64.6            |      |
| I am worried that I might transmit the infection to someone else                        |                    |                  |                     |      |                  |                   |                 |      |
| Agree                                                                                   | 64.0               | 54.2             | 67.7                | 0.11 | 58.5             | 65.0              | 69.8            | 0.57 |
| Neutral                                                                                 | 16.9               | 18.8             | 16.2                |      | 18.7             | 16.6              | 14.8            |      |
| Disagree                                                                                | 19.2               | 27.0             | 16.0                |      | 22.8             | 18.3              | 15.4            |      |
| I am worried I will not have enough food and other essential items during the outbreak  |                    |                  |                     |      |                  |                   |                 |      |
| Agree                                                                                   | 4.7                | 4.6              | 4.6                 | 0.83 | 4.1              | 3.9               | 6.2             | 0.92 |
| Neutral                                                                                 | 7.7                | 6.1              | 8.4                 |      | 6.9              | 8.6               | 8.0             |      |
| Disagree                                                                                | 87.6               | 89.2             | 87.0                |      | 89.0             | 87.5              | 85.9            |      |
| I am worried about missing university                                                   |                    |                  |                     |      |                  |                   |                 |      |
| Agree                                                                                   | 67.8               | 63.8             | 69.5                | 0.60 | 80.4             | 72.1              | 47.7            | <.01 |
| Neutral                                                                                 | 12.6               | 12.6             | 12.6                |      | 9.2              | 12.2              | 17.4            |      |
| Disagree                                                                                | 19.5               | 23.5             | 17.9                |      | 10.4             | 15.7              | 34.9            |      |
| I am worried about the impact on my finances                                            |                    |                  |                     |      |                  |                   |                 |      |
| Agree                                                                                   | 58.4               | 50.0             | 61.6                | 0.24 | 53.5             | 61.8              | 61.3            | 0.71 |
| Neutral                                                                                 | 16.6               | 18.8             | 15.8                |      | 19.9             | 14.3              | 14.6            |      |
| Disagree                                                                                | 25.0               | 31.2             | 22.6                |      | 26.6             | 23.9              | 24.1            |      |
| I am worried about the long-term impact this will have on my academic and job prospects |                    |                  |                     |      |                  |                   |                 |      |
| Agree                                                                                   | 78.9               | 72.7             | 81.4                | 0.27 | 77.6             | 80.8              | 78.6            | 0.92 |
| Neutral                                                                                 | 9.3                | 10.1             | 8.9                 |      | 11.1             | 8.1               | 8.2             |      |
| Disagree                                                                                | 11.8               | 17.2             | 9.7                 |      | 11.2             | 11.1              | 13.2            |      |

Note: \*p-value for chi-square test

**Supplemental Table 2.** Queen's University percentage reporting by gender, age group and year of study. Could you describe the impact that the COVID-19 pandemic and associated social distancing have had on:

|                                                                           | Gender            |                  |                    |      | Age Group       |                  |                |      | Year of Study        |                                              |                              |      |
|---------------------------------------------------------------------------|-------------------|------------------|--------------------|------|-----------------|------------------|----------------|------|----------------------|----------------------------------------------|------------------------------|------|
|                                                                           | Total<br>(n=3013) | Male<br>(n= 862) | Female<br>(n=2100) | p*   | ≤18<br>(n=1166) | 19-20<br>(n=921) | ≥21<br>(n=926) | p*   | Incoming<br>(n= 765) | 1 <sup>st</sup> /2 <sup>nd</sup><br>(n=1238) | ≥3 <sup>rd</sup><br>(n=1010) | p*   |
| <b>Your university studies?</b>                                           |                   |                  |                    |      |                 |                  |                |      |                      |                                              |                              |      |
| Negative                                                                  | 69.9              | 65.2             | 71.8               | 0.60 | 67.2            | 73.1             | 70.1           | 0.72 | 60.1                 | 74.7                                         | 71.3                         | 0.14 |
| Neutral                                                                   | 24.5              | 28.3             | 22.9               |      | 28.5            | 20.6             | 23.2           |      | 34.8                 | 20.0                                         | 22.2                         |      |
| Positive                                                                  | 5.7               | 6.5              | 5.3                |      | 4.4             | 6.3              | 6.7            |      | 5.1                  | 5.3                                          | 6.5                          |      |
| <b>Your plans to continue at university?</b>                              |                   |                  |                    |      |                 |                  |                |      |                      |                                              |                              |      |
| Negative                                                                  | 29.4              | 28.5             | 29.4               | 0.86 | 31.1            | 30.9             | 25.8           | 0.74 | 33.1                 | 28.6                                         | 27.7                         | 0.56 |
| Neutral                                                                   | 61.5              | 60.8             | 62.2               |      | 58.7            | 59.5             | 67.2           |      | 54.8                 | 62.7                                         | 65.2                         |      |
| Positive                                                                  | 9.0               | 10.7             | 8.4                |      | 10.2            | 9.6              | 7.0            |      | 12.2                 | 8.7                                          | 7.0                          |      |
| <b>Your perception of online/remote learning?</b>                         |                   |                  |                    |      |                 |                  |                |      |                      |                                              |                              |      |
| Negative                                                                  | 61.2              | 61.1             | 61.3               | 0.92 | 62.8            | 63.5             | 56.9           | 0.84 | 61.0                 | 61.4                                         | 61.1                         | 1.00 |
| Neutral                                                                   | 24.1              | 23.1             | 24.7               |      | 22.0            | 24.0             | 26.8           |      | 24.1                 | 23.8                                         | 24.5                         |      |
| Positive                                                                  | 14.7              | 15.8             | 14.0               |      | 15.2            | 12.5             | 16.3           |      | 14.9                 | 14.8                                         | 14.5                         |      |
| <b>Your academic grades?</b>                                              |                   |                  |                    |      |                 |                  |                |      |                      |                                              |                              |      |
| Negative                                                                  | 27.8              | 29.0             | 27.2               | 0.89 | 26.9            | 31.2             | 25.5           | 0.68 | 21.7                 | 32.1                                         | 27.0                         | 0.46 |
| Neutral                                                                   | 49.4              | 46.9             | 50.3               |      | 47.0            | 47.1             | 54.6           |      | 50.6                 | 46.4                                         | 52.1                         |      |
| Positive                                                                  | 22.8              | 24.1             | 22.5               |      | 26.1            | 21.7             | 19.9           |      | 27.7                 | 21.4                                         | 20.9                         |      |
| <b>Your prospects for summer internships/exchanges/academic pursuits?</b> |                   |                  |                    |      |                 |                  |                |      |                      |                                              |                              |      |
| Negative                                                                  | 68.0              | 63.9             | 69.8               | 0.68 | 64.0            | 74.3             | 66.8           | 0.43 | 56.7                 | 74.3                                         | 68.8                         | 0.11 |
| Neutral                                                                   | 28.2              | 32.0             | 26.8               |      | 32.2            | 21.1             | 30.3           |      | 38.8                 | 22.0                                         | 27.9                         |      |
| Positive                                                                  | 3.8               | 4.1              | 3.5                |      | 3.8             | 4.7              | 2.8            |      | 4.4                  | 3.7                                          | 3.3                          |      |
| <b>Your prospects for summer employment?</b>                              |                   |                  |                    |      |                 |                  |                |      |                      |                                              |                              |      |
| Negative                                                                  | 69.3              | 65.3             | 71.4               | 0.64 | 68.2            | 71.6             | 68.5           | 0.82 | 62.2                 | 73.7                                         | 69.3                         | 0.45 |
| Neutral                                                                   | 24.4              | 27.1             | 23.0               |      | 23.8            | 22.5             | 27.0           |      | 28.8                 | 20.6                                         | 25.6                         |      |
| Positive                                                                  | 6.3               | 7.5              | 5.7                |      | 8.1             | 6.0              | 4.5            |      | 9.0                  | 5.7                                          | 5.0                          |      |
| <b>Your prospects to realize your career aspirations?</b>                 |                   |                  |                    |      |                 |                  |                |      |                      |                                              |                              |      |
| Negative                                                                  | 37.8              | 33.8             | 39.4               | 0.68 | 28.8            | 40.7             | 46.2           | 0.15 | 25.4                 | 38.7                                         | 46.1                         | 0.05 |
| Neutral                                                                   | 54.8              | 57.8             | 53.9               |      | 62.9            | 51.9             | 47.6           |      | 65.9                 | 54.3                                         | 47.1                         |      |
| Positive                                                                  | 7.4               | 8.5              | 6.8                |      | 8.3             | 7.4              | 6.2            |      | 8.8                  | 7.0                                          | 6.7                          |      |
| <b>Your finances?</b>                                                     |                   |                  |                    |      |                 |                  |                |      |                      |                                              |                              |      |
| Negative                                                                  | 51.8              | 46.4             | 54.1               | 0.53 | 45.5            | 55.3             | 56.4           | 0.53 | 40.3                 | 56.5                                         | 54.9                         | 0.16 |
| Neutral                                                                   | 38.0              | 41.6             | 36.5               |      | 43.3            | 36.0             | 33.3           |      | 47.2                 | 35.1                                         | 34.7                         |      |
| Positive                                                                  | 10.2              | 11.9             | 9.3                |      | 11.2            | 8.7              | 10.4           |      | 12.5                 | 8.5                                          | 10.5                         |      |
| <b>Your ability to access enough food or other essential items?</b>       |                   |                  |                    |      |                 |                  |                |      |                      |                                              |                              |      |
| Negative                                                                  | 10.7              | 10.2             | 10.9               | 0.99 | 8.6             | 11.4             | 12.6           | 0.88 | 9.0                  | 10.3                                         | 12.4                         | 0.85 |
| Neutral                                                                   | 80.8              | 81.0             | 80.6               |      | 82.2            | 79.4             | 80.2           |      | 80.0                 | 81.8                                         | 80.0                         |      |
| Positive                                                                  | 8.6               | 8.8              | 8.6                |      | 9.2             | 9.2              | 7.1            |      | 11.0                 | 7.8                                          | 7.6                          |      |
| <b>Your ability to exercise?</b>                                          |                   |                  |                    |      |                 |                  |                |      |                      |                                              |                              |      |
| Negative                                                                  | 42.9              | 46.6             | 41.1               | 0.58 | 40.7            | 41.0             | 47.6           | 0.68 | 40.4                 | 42.0                                         | 45.9                         | 0.88 |
| Neutral                                                                   | 26.8              | 27.5             | 26.5               |      | 25.7            | 30.9             | 24.1           |      | 25.9                 | 28.9                                         | 25.0                         |      |
| Positive                                                                  | 30.3              | 25.9             | 32.4               |      | 33.6            | 28.0             | 28.3           |      | 33.7                 | 29.1                                         | 29.1                         |      |

**Supplemental Table 2 (Continued)**

|                                                                 | Gender            |                 |                    | Age Group       |                  |                | Year of Study        |                                              |                              | p*   |      |      |
|-----------------------------------------------------------------|-------------------|-----------------|--------------------|-----------------|------------------|----------------|----------------------|----------------------------------------------|------------------------------|------|------|------|
|                                                                 | Total<br>(n=3013) | Male<br>(n=862) | Female<br>(n=2100) | ≤18<br>(n=1166) | 19-20<br>(n=921) | ≥21<br>(n=926) | Incoming<br>(n= 765) | 1 <sup>st</sup> /2 <sup>nd</sup><br>(n=1238) | ≥3 <sup>rd</sup><br>(n=1010) |      |      |      |
| Your ability to participate in hobbies/leisure activities?      |                   |                 |                    |                 |                  |                |                      |                                              |                              |      |      |      |
| Negative                                                        | 56.4              | 57.1            | 56.3               | 0.40            | 54.6             | 56.9           | 58.2                 | 0.86                                         | 55.7                         | 56.1 | 57.3 | 0.99 |
| Neutral                                                         | 16.3              | 20.5            | 14.7               |                 | 15.2             | 18.9           | 15.2                 |                                              | 16.3                         | 16.6 | 16.0 |      |
| Positive                                                        | 27.2              | 22.4            | 29.0               |                 | 30.2             | 24.2           | 26.6                 |                                              | 28.0                         | 27.3 | 26.6 |      |
| Your ability to connect with your friends and your social life? |                   |                 |                    |                 |                  |                |                      |                                              |                              |      |      |      |
| Negative                                                        | 74.0              | 72.7            | 74.6               | 0.95            | 71.1             | 76.1           | 75.7                 | 0.78                                         | 68.8                         | 75.7 | 76.0 | 0.67 |
| Neutral                                                         | 15.9              | 16.8            | 15.5               |                 | 16.3             | 14.5           | 16.8                 |                                              | 17.9                         | 14.5 | 16.2 |      |
| Positive                                                        | 10.0              | 10.4            | 9.9                |                 | 12.6             | 9.3            | 7.5                  |                                              | 13.3                         | 9.9  | 7.7  |      |
| Your relationships with your family members?                    |                   |                 |                    |                 |                  |                |                      |                                              |                              |      |      |      |
| Negative                                                        | 24.9              | 20.2            | 26.6               | 0.37            | 25.0             | 24.2           | 25.4                 | 0.99                                         | 23.1                         | 26.4 | 24.4 | 0.97 |
| Neutral                                                         | 41.6              | 48.3            | 39.0               |                 | 39.9             | 42.2           | 43.1                 |                                              | 43.0                         | 39.3 | 43.4 |      |
| Positive                                                        | 33.5              | 31.6            | 34.4               |                 | 35.1             | 33.6           | 31.5                 |                                              | 33.9                         | 34.3 | 32.3 |      |

Note: \*p-value for chi-square test

1  
2  
3  
4  
5  
6  
7  
8  
9  
10  
11  
12  
13  
14  
15  
16  
17  
18  
19  
20  
21  
22  
23  
24  
25  
26  
27  
28  
29  
30  
31  
32  
33  
34  
35  
36  
37  
38  
39  
40  
41  
42  
43  
44  
45  
46  
47  
48  
49  
50  
51  
52  
53  
54  
55  
56  
57  
58  
59  
60

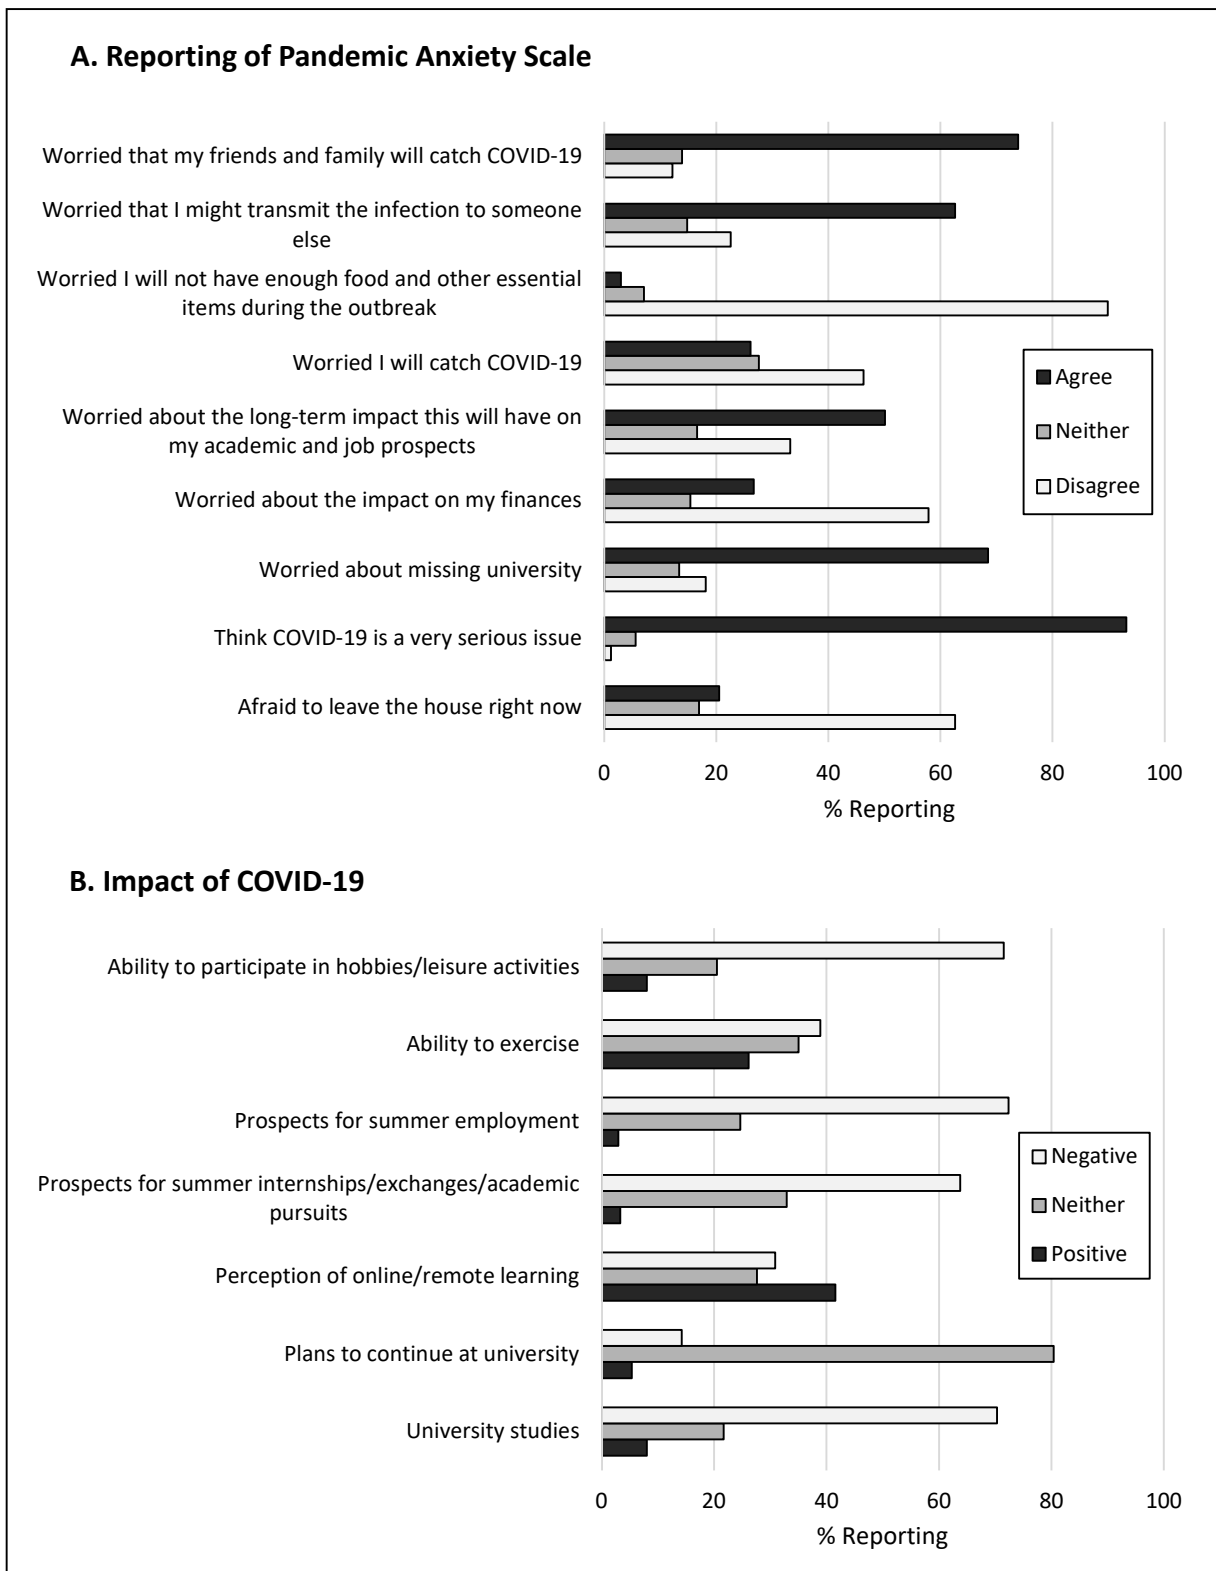

**Supplemental Figure 1.** Oxford university students' (n= 337) responses to the Pandemic Anxiety Scale items (Panel A), and items relating to the impact that COVID-19 and associated social distancing have had on various aspects of their lives (Panel B).

**Supplemental Materials Appendix A1: Quotes from qualitative data analysis of free text responses***Social isolation*

“I highly depend on social environments to support my mental health, so not being able to see friends is quite challenging as it makes my depression worse”

“Forced separation from part of my support system has had a negative impact on both my academics and mental health”

“Impacts of the pandemic on family members have reverberating effects to all members of household”

“Being stuck in a house with my parents has negatively impacted my mental health”

“I have to be near my emotionally abusive mother, I self harm a lot more now and I really need access to university student wellness center but I cannot call them while here”

“I've been feeling more lonely and restless with the pandemic going on. There are less outlets to relax due to isolation (ie sports leagues, meeting with friends, etc.)”

“As much as I would sometimes find social interaction difficult and draining, being starved of it is definitely having a negative impact on my mental health.”

“Not being able to meet up with friends in person has been somewhat of a blow to mental health”

“Not being able to see my partner has had a significant impact on my mental health.”

“Having no break from my fairly stressful home situation has not been great for my mental health”

“I find being stuck inside with my family is very stressful and it leaves me sometimes feeling unable to work which compounds the already existing stress about work and it often becomes a cycle I find difficult to break”

*Work adaptation*

“Living and working in the same place is a struggle. I am concerned about this going into another year of school with little opportunity for in person learning or access to on campus study spaces.

I am nervous about completing my final year of my undergraduate degree remotely, as my program is very lab-based.”

“I am finding it hard to keep a balanced perspective on work and assignments working at home by myself and not being around friends.”

“Getting myself into an exam or essay-writing mindset at home is much harder than I thought it would be.”

“I am much less motivated to do my university assignments when I am home compared to when I am at university”

### *Coping skills*

“I have found that with the pandemic and social distancing requirements I have had more difficulty than normal maintaining my mental wellness. I have struggled with some anxiety at several points in the past few months as I haven't have school or work to focus on, and small problems are exacerbated as they are taking up more focus.”

“It's devastating that we won't get a normal orientation week or first year, but I do understand that Queen's is doing everything they can to try and make it better.”

“Severely imparts my ability to spend time outdoors and with my friends, things like rock climbing and hiking and yoga, which are all very important to maintaining my mental health and managing anxiety. It's been a lot harder to deal with in the absence of these things. School was much more stressful online without support of classmates and less connection to professors.”

“It has removed my ability to train for my sport which was a crucial part of my weekly structure 6 days a week, and was critical in my being able to maintain my mental health and work/study productively”

### *Unique populations*

“I have been too scared to see my doctor about my physical digestive health issues and they have gotten much worse. I will likely need a lot of treatment when this is all over. I'm too scared to go to a hospital or doctors office because of the virus at the moment as I live with vulnerable individuals”

“Too afraid to visit hospital for routine problems.”

“I lost my childcare for two children under 3. Completing online synchronous school while my partner works long hours in the emergency department, and having no help from family because of COVID-19 has left me feeling overwhelmed, un-engaged, frustrated, and easily angered. It has impacted my relationship with my partner and to some extent my self worth as I am being forced to be a stay-at-home mother and student and am unsure if I'll be able to work which gives me a lot of fulfillment, and much needed mental stimulation.”

“Trying to juggle dependents alone while in school, as my spouse continues to work”

“Being an international student, I couldn't go back home due to the pandemic. As a result I am all alone. It's lonely and i get restless at times. all this negatively affects by study”

“Not being able to go home as an international student, it was scary to be in this situation in another country”

“Local regulations on flights and exit and entry make international travel difficult, and this also results in the increase in the price of air tickets. An one-way ticket from Canada to China is above 7000 dollars, which is not affordable for me.”

“As an international student, I had trouble coming back home, which caused severe stress and started a period of worse mental health for me.”



# Reporting checklist for cross sectional study.

Based on the STROBE cross sectional guidelines.

|                            |                     | Reporting Item                                                                                                                                                  | Page Number |
|----------------------------|---------------------|-----------------------------------------------------------------------------------------------------------------------------------------------------------------|-------------|
| <b>Title and abstract</b>  |                     |                                                                                                                                                                 |             |
| Title                      | <a href="#">#1a</a> | Indicate the study's design with a commonly used term in the title or the abstract                                                                              | 1           |
| Abstract                   | <a href="#">#1b</a> | Provide in the abstract an informative and balanced summary of what was done and what was found                                                                 | 1           |
| <b>Introduction</b>        |                     |                                                                                                                                                                 |             |
| Background / rationale     | <a href="#">#2</a>  | Explain the scientific background and rationale for the investigation being reported                                                                            | 2           |
| Objectives                 | <a href="#">#3</a>  | State specific objectives, including any prespecified hypotheses                                                                                                | 1,2         |
| <b>Methods</b>             |                     |                                                                                                                                                                 |             |
| Study design               | <a href="#">#4</a>  | Present key elements of study design early in the paper                                                                                                         | 3           |
| Setting                    | <a href="#">#5</a>  | Describe the setting, locations, and relevant dates, including periods of recruitment, exposure, follow-up, and data collection                                 | 3           |
| Eligibility criteria       | <a href="#">#6a</a> | Give the eligibility criteria, and the sources and methods of selection of participants.                                                                        | 3           |
|                            | <a href="#">#7</a>  | Clearly define all outcomes, exposures, predictors, potential confounders, and effect modifiers. Give diagnostic criteria, if applicable                        | 3           |
| Data sources / measurement | <a href="#">#8</a>  | For each variable of interest give sources of data and details of methods of assessment (measurement). Describe comparability of assessment methods if there is | 3-4         |

more than one group. Give information separately for for exposed and unexposed groups if applicable.

|    |                  |                      |                                                                  |
|----|------------------|----------------------|------------------------------------------------------------------|
| 1  |                  |                      |                                                                  |
| 2  |                  |                      |                                                                  |
| 3  |                  |                      |                                                                  |
| 4  | Bias             | <a href="#">#9</a>   | Describe any efforts to address potential sources of bias 3-4    |
| 5  |                  |                      |                                                                  |
| 6  | Study size       | <a href="#">#10</a>  | Explain how the study size was arrived at 4                      |
| 7  |                  |                      |                                                                  |
| 8  | Quantitative     | <a href="#">#11</a>  | Explain how quantitative variables were handled in the 3-4       |
| 9  | variables        |                      | analyses. If applicable, describe which groupings were           |
| 10 |                  |                      | chosen, and why                                                  |
| 11 |                  |                      |                                                                  |
| 12 |                  |                      |                                                                  |
| 13 |                  |                      |                                                                  |
| 14 | Statistical      | <a href="#">#12a</a> | Describe all statistical methods, including those used to 3-4    |
| 15 | methods          |                      | control for confounding                                          |
| 16 |                  |                      |                                                                  |
| 17 | Statistical      | <a href="#">#12b</a> | Describe any methods used to examine subgroups and 3-4           |
| 18 | methods          |                      | interactions                                                     |
| 19 |                  |                      |                                                                  |
| 20 |                  |                      |                                                                  |
| 21 | Statistical      | <a href="#">#12c</a> | Explain how missing data were addressed 3-4                      |
| 22 | methods          |                      |                                                                  |
| 23 |                  |                      |                                                                  |
| 24 |                  |                      |                                                                  |
| 25 | Statistical      | <a href="#">#12d</a> | If applicable, describe analytical methods taking account of n/a |
| 26 | methods          |                      | sampling strategy                                                |
| 27 |                  |                      |                                                                  |
| 28 |                  |                      | Not done                                                         |
| 29 |                  |                      |                                                                  |
| 30 | Statistical      | <a href="#">#12e</a> | Describe any sensitivity analyses n/a                            |
| 31 | methods          |                      |                                                                  |
| 32 |                  |                      | Not done                                                         |
| 33 |                  |                      |                                                                  |
| 34 |                  |                      |                                                                  |
| 35 | <b>Results</b>   |                      |                                                                  |
| 36 |                  |                      |                                                                  |
| 37 | Participants     | <a href="#">#13a</a> | Report numbers of individuals at each stage of study—eg 4        |
| 38 |                  |                      | numbers potentially eligible, examined for eligibility,          |
| 39 |                  |                      | confirmed eligible, included in the study, completing follow-    |
| 40 |                  |                      | up, and analysed. Give information separately for for            |
| 41 |                  |                      | exposed and unexposed groups if applicable.                      |
| 42 |                  |                      |                                                                  |
| 43 |                  |                      |                                                                  |
| 44 |                  |                      |                                                                  |
| 45 | Participants     | <a href="#">#13b</a> | Give reasons for non-participation at each stage 4               |
| 46 |                  |                      |                                                                  |
| 47 | Participants     | <a href="#">#13c</a> | Consider use of a flow diagram n/a                               |
| 48 |                  |                      |                                                                  |
| 49 |                  |                      |                                                                  |
| 50 |                  |                      | Described in                                                     |
| 51 |                  |                      | prose                                                            |
| 52 |                  |                      |                                                                  |
| 53 |                  |                      |                                                                  |
| 54 | Descriptive data | <a href="#">#14a</a> | Give characteristics of study participants (eg demographic, 4-5  |
| 55 |                  |                      | clinical, social) and information on exposures and potential     |
| 56 |                  |                      | confounders. Give information separately for exposed and         |
| 57 |                  |                      | unexposed groups if applicable.                                  |
| 58 |                  |                      |                                                                  |
| 59 |                  |                      |                                                                  |
| 60 |                  |                      |                                                                  |

|    |                          |                      |                                                                                                                                                                                                          |                                   |
|----|--------------------------|----------------------|----------------------------------------------------------------------------------------------------------------------------------------------------------------------------------------------------------|-----------------------------------|
| 1  | Descriptive data         | <a href="#">#14b</a> | Indicate number of participants with missing data for each variable of interest                                                                                                                          | 4                                 |
| 2  |                          |                      |                                                                                                                                                                                                          |                                   |
| 3  |                          |                      |                                                                                                                                                                                                          |                                   |
| 4  | Outcome data             | <a href="#">#15</a>  | Report numbers of outcome events or summary measures. Give information separately for exposed and unexposed groups if applicable.                                                                        | 5-8                               |
| 5  |                          |                      |                                                                                                                                                                                                          |                                   |
| 6  |                          |                      |                                                                                                                                                                                                          |                                   |
| 7  |                          |                      |                                                                                                                                                                                                          |                                   |
| 8  |                          |                      |                                                                                                                                                                                                          |                                   |
| 9  |                          |                      |                                                                                                                                                                                                          |                                   |
| 10 | Main results             | <a href="#">#16a</a> | Give unadjusted estimates and, if applicable, confounder-adjusted estimates and their precision (eg, 95% confidence interval). Make clear which confounders were adjusted for and why they were included | n/a<br>Descriptive Analysis       |
| 11 |                          |                      |                                                                                                                                                                                                          |                                   |
| 12 |                          |                      |                                                                                                                                                                                                          |                                   |
| 13 |                          |                      |                                                                                                                                                                                                          |                                   |
| 14 |                          |                      |                                                                                                                                                                                                          |                                   |
| 15 |                          |                      |                                                                                                                                                                                                          |                                   |
| 16 |                          |                      |                                                                                                                                                                                                          |                                   |
| 17 | Main results             | <a href="#">#16b</a> | Report category boundaries when continuous variables were categorized                                                                                                                                    | 3,5                               |
| 18 |                          |                      |                                                                                                                                                                                                          |                                   |
| 19 |                          |                      |                                                                                                                                                                                                          |                                   |
| 20 |                          |                      |                                                                                                                                                                                                          |                                   |
| 21 | Main results             | <a href="#">#16c</a> | If relevant, consider translating estimates of relative risk into absolute risk for a meaningful time period                                                                                             | n/a<br>Not relevant to this study |
| 22 |                          |                      |                                                                                                                                                                                                          |                                   |
| 23 |                          |                      |                                                                                                                                                                                                          |                                   |
| 24 |                          |                      |                                                                                                                                                                                                          |                                   |
| 25 |                          |                      |                                                                                                                                                                                                          |                                   |
| 26 |                          |                      |                                                                                                                                                                                                          |                                   |
| 27 | Other analyses           | <a href="#">#17</a>  | Report other analyses done—e.g., analyses of subgroups and interactions, and sensitivity analyses                                                                                                        | 3-5                               |
| 28 |                          |                      |                                                                                                                                                                                                          |                                   |
| 29 |                          |                      |                                                                                                                                                                                                          |                                   |
| 30 |                          |                      |                                                                                                                                                                                                          |                                   |
| 31 | <b>Discussion</b>        |                      |                                                                                                                                                                                                          |                                   |
| 32 |                          |                      |                                                                                                                                                                                                          |                                   |
| 33 | Key results              | <a href="#">#18</a>  | Summarise key results with reference to study objectives                                                                                                                                                 | 5-8                               |
| 34 |                          |                      |                                                                                                                                                                                                          |                                   |
| 35 | Limitations              | <a href="#">#19</a>  | Discuss limitations of the study, taking into account sources of potential bias or imprecision. Discuss both direction and magnitude of any potential bias.                                              | 10                                |
| 36 |                          |                      |                                                                                                                                                                                                          |                                   |
| 37 |                          |                      |                                                                                                                                                                                                          |                                   |
| 38 |                          |                      |                                                                                                                                                                                                          |                                   |
| 39 |                          |                      |                                                                                                                                                                                                          |                                   |
| 40 |                          |                      |                                                                                                                                                                                                          |                                   |
| 41 | Interpretation           | <a href="#">#20</a>  | Give a cautious overall interpretation considering objectives, limitations, multiplicity of analyses, results from similar studies, and other relevant evidence.                                         | 10                                |
| 42 |                          |                      |                                                                                                                                                                                                          |                                   |
| 43 |                          |                      |                                                                                                                                                                                                          |                                   |
| 44 |                          |                      |                                                                                                                                                                                                          |                                   |
| 45 |                          |                      |                                                                                                                                                                                                          |                                   |
| 46 | Generalisability         | <a href="#">#21</a>  | Discuss the generalisability (external validity) of the study results                                                                                                                                    | 10                                |
| 47 |                          |                      |                                                                                                                                                                                                          |                                   |
| 48 |                          |                      |                                                                                                                                                                                                          |                                   |
| 49 |                          |                      |                                                                                                                                                                                                          |                                   |
| 50 | <b>Other Information</b> |                      |                                                                                                                                                                                                          |                                   |
| 51 |                          |                      |                                                                                                                                                                                                          |                                   |
| 52 |                          |                      |                                                                                                                                                                                                          |                                   |
| 53 |                          |                      |                                                                                                                                                                                                          |                                   |
| 54 | Funding                  | <a href="#">#22</a>  | Give the source of funding and the role of the funders for the present study and, if applicable, for the original study on which the present article is based                                            | 11                                |
| 55 |                          |                      |                                                                                                                                                                                                          |                                   |
| 56 |                          |                      |                                                                                                                                                                                                          |                                   |
| 57 |                          |                      |                                                                                                                                                                                                          |                                   |
| 58 |                          |                      |                                                                                                                                                                                                          |                                   |
| 59 |                          |                      |                                                                                                                                                                                                          |                                   |
| 60 |                          |                      |                                                                                                                                                                                                          |                                   |

# BMJ Open

## Impact of the COVID-19 pandemic on the experience and mental health of university students studying in Canada and the United Kingdom: a cross-sectional study

|                                 |                                                                                                                                                                                                                                                                                                                                                                                                                                                                                                                                                                                                                                                                                                                                                                                             |
|---------------------------------|---------------------------------------------------------------------------------------------------------------------------------------------------------------------------------------------------------------------------------------------------------------------------------------------------------------------------------------------------------------------------------------------------------------------------------------------------------------------------------------------------------------------------------------------------------------------------------------------------------------------------------------------------------------------------------------------------------------------------------------------------------------------------------------------|
| Journal:                        | <i>BMJ Open</i>                                                                                                                                                                                                                                                                                                                                                                                                                                                                                                                                                                                                                                                                                                                                                                             |
| Manuscript ID                   | bmjopen-2021-050187.R1                                                                                                                                                                                                                                                                                                                                                                                                                                                                                                                                                                                                                                                                                                                                                                      |
| Article Type:                   | Original research                                                                                                                                                                                                                                                                                                                                                                                                                                                                                                                                                                                                                                                                                                                                                                           |
| Date Submitted by the Author:   | 05-Aug-2021                                                                                                                                                                                                                                                                                                                                                                                                                                                                                                                                                                                                                                                                                                                                                                                 |
| Complete List of Authors:       | Appleby, Jennifer A; University of Oxford Medical Sciences Division, Oxford Medical School<br>King, Nathan; Queen's University, Department of Public Health Sciences<br>Saunders, Kate E ; University of Oxford, Department of Psychiatry; Warneford Hospital, Oxford Health NHS Foundation Trust<br>Bast, Anne; University of Oxford Medical Sciences Division, Oxford Medical School<br>Rivera, Daniel; University of Toronto, Department of Pharmacology and Toxicology<br>Byun, Jin; Queen's University Faculty of Health Sciences<br>Cunningham, Simone; Queen's University Department of Psychology<br>Khera, Charandeep; University of Oxford, Department of Psychiatry<br>Duffy, Anne; Queen's University, Department of Psychiatry; University of Oxford, Department of Psychiatry |
| <b>Primary Subject Heading</b>: | Mental health                                                                                                                                                                                                                                                                                                                                                                                                                                                                                                                                                                                                                                                                                                                                                                               |
| Secondary Subject Heading:      | Qualitative research                                                                                                                                                                                                                                                                                                                                                                                                                                                                                                                                                                                                                                                                                                                                                                        |
| Keywords:                       | COVID-19, PSYCHIATRY, MENTAL HEALTH                                                                                                                                                                                                                                                                                                                                                                                                                                                                                                                                                                                                                                                                                                                                                         |
|                                 |                                                                                                                                                                                                                                                                                                                                                                                                                                                                                                                                                                                                                                                                                                                                                                                             |

SCHOLARONE™  
Manuscripts



I, the Submitting Author has the right to grant and does grant on behalf of all authors of the Work (as defined in the below author licence), an exclusive licence and/or a non-exclusive licence for contributions from authors who are: i) UK Crown employees; ii) where BMJ has agreed a CC-BY licence shall apply, and/or iii) in accordance with the terms applicable for US Federal Government officers or employees acting as part of their official duties; on a worldwide, perpetual, irrevocable, royalty-free basis to BMJ Publishing Group Ltd ("BMJ") its licensees and where the relevant Journal is co-owned by BMJ to the co-owners of the Journal, to publish the Work in this journal and any other BMJ products and to exploit all rights, as set out in our [licence](#).

The Submitting Author accepts and understands that any supply made under these terms is made by BMJ to the Submitting Author unless you are acting as an employee on behalf of your employer or a postgraduate student of an affiliated institution which is paying any applicable article publishing charge ("APC") for Open Access articles. Where the Submitting Author wishes to make the Work available on an Open Access basis (and intends to pay the relevant APC), the terms of reuse of such Open Access shall be governed by a Creative Commons licence – details of these licences and which [Creative Commons](#) licence will apply to this Work are set out in our licence referred to above.

Other than as permitted in any relevant BMJ Author's Self Archiving Policies, I confirm this Work has not been accepted for publication elsewhere, is not being considered for publication elsewhere and does not duplicate material already published. I confirm all authors consent to publication of this Work and authorise the granting of this licence.

COVID-19 Impact on University Students

# Impact of the COVID-19 pandemic on the experience and mental health of university students studying in Canada and the United Kingdom: a cross-sectional study

Appleby, J.A.<sup>1</sup>, King, N.<sup>2</sup>, Saunders, K.E.A.<sup>3,4</sup>, Bast, A.<sup>1</sup>, Rivera, D.<sup>5</sup>, Byun, J.<sup>6</sup>,  
Cunningham, S.<sup>7</sup>, Khera, C.K.<sup>3</sup>, and Duffy, A.<sup>3,8\*</sup>

<sup>1</sup>Oxford Medical School, Medical Sciences Division, University of Oxford, Oxford, United Kingdom

<sup>2</sup>Department of Public Health Sciences, Queen's University, Kingston, ON, Canada.

<sup>3</sup>Department of Psychiatry, University of Oxford, Oxford, United Kingdom.

<sup>4</sup>Oxford Health NHS Foundation Trust, Warneford Hospital Oxford OX3 7JX

<sup>5</sup>Department of Pharmacology and Toxicology, University of Toronto, Toronto, ON, Canada;

<sup>6</sup>Faculty of Health Sciences, Queen's University, Kingston, ON, Canada.

<sup>7</sup>Department of Psychology, Queen's University, Kingston, ON, Canada.

<sup>8</sup>Department of Psychiatry, Division of Student Mental Health, Queen's University, Kingston, ON, Canada.

## Correspondence:

Professor Anne Duffy  
anne.duffy@queensu.ca

**Keywords:** COVID-19, psychiatry, public health

Word count: 4000

## COVID-19 Impact on University Students

### Abstract

**Objectives:** To explore the impact of the COVID-19 pandemic on the experiences and mental health of university students.

**Design:** A cross-sectional study consisting of an electronic survey about students' experiences and concerns during the pandemic and the associated impact. In addition to the quantitative analysis, free text responses were extracted and analysed using a framework technique

**Setting:** Queen's university in Canada and the University of Oxford in the UK

**Participants:** Undergraduate students at Queen's university and first year undergraduate students at the University of Oxford were invited to complete the COVID supplement survey. This study included data from 3013 Queen's students as the primary focus and 339 Oxford students as a secondary comparison.

**Results:** Females at Queen's reported greater adherence to government recommendations to prevent the spread of COVID-19 (91.3% vs 86.7%,  $p < .01$ ) and were more likely to self-isolate (63.9% vs 57.0%,  $p < .01$ ) than males. A similar trend was seen among Oxford students. Students' concerns were wide-ranging including those related to their learning experience, finances, and future academic and career prospects. 78.9% of Queen's students and 50.4% of first-year Oxford students reported worries about the long-term impact on their academic and job prospects. A sizeable proportion of students also reported that the pandemic negatively impacted their plans to continue at university (29.4% of Queen's, 14.2% of Oxford), and disrupted activities important to their mental well-being. Key themes identified in the qualitative component included the negative impacts of social isolation, challenging academic changes, and disruption to support services and means of coping.

**Conclusions:** Overall, findings underscore the importance of addressing areas of student concern and the aspects of student life negatively impacted by the pandemic in order to maintain student well-being and support a successful university experience.

### Article Summary: Strengths and limitations of this study

- The first study to compare the impact of the COVID-19 pandemic on university students across different countries.
- Responses were obtained from large, diverse samples of university students.
- Validated measures were used to assess the impact of the pandemic on students.
- A low response rate was obtained from the Queen's University sample.
- Participants were surveyed early in the pandemic, and the impact on students may change over time.

## 1 Introduction

## COVID-19 Impact on University Students

In late 2019, the novel Coronavirus (COVID-19) was detected in Wuhan, China, causing disease ranging from asymptomatic infection to life-threatening respiratory compromise.[1] The restrictions imposed to limit viral transmission and the direct impact of the virus have profoundly affected daily life and well-being, with heightened anxiety and reduced access to usual coping mechanisms such as exercise, socialisation, and leisure activities.[2]

University students are a subgroup of the population particularly affected by COVID-19. Remote teaching and social distancing measures implemented across institutions worldwide have dramatically changed campus life.[3] In addition to the changes to daily living experienced by the general population, students have experienced disruption to their learning, assessment and schedules, and the cancellation of enriched learning opportunities such as field trips, laboratory courses, and learning exchanges. Additionally, the pandemic may affect future educational opportunities, job prospects, and financial stability.

The pandemic and its aftermath will likely have lasting effects on both students and universities. Therefore, there is a pressing need for the collection of reliable data to assess the impact of the pandemic on student well-being and academic outcomes. This would improve our understanding of student experiences and concerns, informing institutions' approaches to addressing these.

In this study, we aimed to explore university student experiences and concerns during the COVID-19 pandemic, including worries related to the pandemic and the associated impact on education, daily life, career prospects, and mental health support. We leveraged an ongoing longitudinal survey study of undergraduate students attending Queen's University in Canada and the University of Oxford in the UK.[4-5]

## 2 Methods

COVID-specific measures were added to the ongoing U-Flourish Student Well-Being and Academic Success survey,[6] which invites first-year university students at Queen's (Canada) and Oxford (UK) to complete electronic surveys at the beginning and end of each academic year. The surveys ask about risk and protective factors for well-being and mental health using validated measures. COVID-related questions were added to the U-Flourish follow-up survey for participating first-year Oxford students (May 2020) and sent out as a supplementary survey to all registered Queen's undergraduate students (July 2020).

### 2.1 Study Variables

#### 2.1.1 Demographic Characteristics.

Age in years and gender were self-reported and international student status, and program and year of study were obtained from university administrative data.

#### 2.1.2 COVID-19 related measures.

Queen's participants were asked to describe their approach to self-isolation during the pandemic by selecting all options that applied from a list of nine options, grouped into: (1) No change (i.e., "I have lived my life as normal"), (2) Minor change, but not self-isolation (e.g., social distancing, working from home), and (3) Self-isolation (i.e., staying at home and avoiding contact with people outside of your household). Participants rated their knowledge level on COVID-19 from "1 – Very Poor" to "7- Very Good", and whether they have been following government recommendations from "1 – Not at all" to "7 – Very much so".



## COVID-19 Impact on University Students

At both Queen's and Oxford, anxiety surrounding the pandemic was assessed using the COVID-19 Pandemic Anxiety Scale.[7] A series of nine statements asked, how serious an issue do you think COVID-19 is, and how worried are you about the following: catching COVID-19, friends and family catching COVID-19, leaving the house, infecting others, having enough food and other essential items, missing university, and the impact on your finances and long-term academic and job prospects. Each statement was rated on a five-point scale according to level of agreement, re-categorised into 'Disagree' (1-2), 'Neither disagree or agree' (3), and 'Agree' (4-5).

To gauge the impact of COVID-19 on student life, students were asked about the impact of the pandemic on studies and learning opportunities, future academic/professional prospects, lifestyle, relationships and connectedness, and for those in need, access to mental health support. Participants rated the impact of the pandemic and associated social distancing on a five-point scale from 1= Very negative to 5= Very positive (categorised into 'Negative', 'Neither', or 'Positive'). On the Oxford survey, 7 of the 13 impact items were included. Participants were asked if any mental health support they receive had been stopped, postponed or negatively affected due to the pandemic.

Finally, participants were asked "Are there any other significant impacts related to the COVID-19 pandemic on your mental health, wellbeing, or education that you would like to comment on?"

### 2.2 Statistical Analysis

The primary analysis utilised data from the Queen's COVID-19 survey. Responses to the Pandemic Anxiety Scale and questions assessing the impact of the pandemic and associated social distancing were examined in the Oxford sample in an exploratory manner to compare between institutions and countries. Samples were restricted to participants with complete data on the variables of interest. Analyses were conducted using RStudio.[8] Descriptive statistics were used to describe the sample, and responses to the Pandemic Anxiety Scale and COVID-19 impact items overall and by gender, age group and year of study. The Oxford sample only included first-year students of similar ages, so analyses were limited to examining differences by gender. Students identifying as other than 'male' or 'female' were not included in the gender-stratified analyses because of small numbers (n= 34/3013 in the Queen's sample). Differences in proportions between strata were examined using chi-square tests. The difference in average knowledge of COVID-19 between males and females, and age groups were examined using a t-test.

Qualitative data from the Queen's and Oxford surveys were extracted from free text responses. Qualitative analysis used a framework technique.[9-10] Participant data were interpreted and summarized. Codes comprised of similar information were merged leading to a framework of specific phenomena that appeared increasingly likely to reflect the participant's experience. The study team met regularly to discuss the findings and refine the emerging framework. To reduce researcher bias, the team analysing the qualitative data were not made aware of the quantitative findings until the framework had been agreed.

The STROBE cross-sectional reporting guidelines were used in the reporting of this study.[11]

### 2.3 Patient and public involvement

## COVID-19 Impact on University Students

The ongoing UFlourish survey is a student-informed research effort.[6] Peer health educators (PHEs) are included at all stages of the research from design to implementation and we will include the student perspective in the interpretation and dissemination of findings.

### 3 Results

#### 3.1 Description of the sample

The response rate among Queen's undergraduate students was 13.5% (n= 3,452). In this report, we describe the responses of 3,013 Queen's students with complete data on the variables of interest (Table 1). Students with missing data (n=439) were similar in age (Mean(SD)= 19.6(3.1) vs 19.8(2.9), p=0.34), but more likely to identify as male (38.5% vs 28.8%, p<.001) and be international students (21.7% vs 7.5%, p<.001). The Queen's sample was broadly representative of the eligible student population by year and program of study, full versus part-time, and international versus domestic status. However, more students in the sample identified as female (70.1% vs. 57.7%,  $\chi^2$  p<.01) and were younger than 19 years old (40.6% vs 35.0%,  $\chi^2$  p<.01). The average age of the study sample was 19.6 (SD= 2.8), and most students were domestic (92.5%). Students were most likely to be preparing to begin first year (25.4%) or finishing first year (23.9%), and the most common programs of study were Arts, Humanities, and Social Sciences (33.8%), Life and Physical Sciences (27.4%), and Engineering and Applied Science (20.2%).

The response rate among the first-year Oxford student cohort was 45.0% (n=356). The Oxford sample also had a higher proportion of females (62.1% vs 54.3%) than the university database. Participants' programs of study included: Humanities (34.6%), Mathematical, Physical and Life Sciences (32.0%), Medical Sciences (19.9%), Social Sciences (13.6%), and unknown (13.6%). In this report we describe the responses of 339 students with complete data on the Pandemic Anxiety Scale and the impact of COVID-19 items. The average age of student respondents was 18.4 years old, and the majority identified as female (61.7%). In comparison, Queen's first-year students were an average age of 18.6 (SD=2.4) years and 72.1% identified as female.

## COVID-19 Impact on University Students

**Table 1.** Description of the Queen's (Canadian) summer 2020 survey sample, including student levels of knowledge on COVID-19, following of recommendations, and approaches to self-isolation

|                                           | n    | (%)    |
|-------------------------------------------|------|--------|
| <b>Age</b>                                |      |        |
| ≤18                                       | 1222 | (40.6) |
| 19-20                                     | 1062 | (35.3) |
| ≥21                                       | 729  | (24.2) |
| <b>Gender</b>                             |      |        |
| Female                                    | 2111 | (70.1) |
| Male                                      | 868  | (28.8) |
| Other                                     | 34   | (1.13) |
| <b>Program of Study</b>                   |      |        |
| Arts, Humanities & Social Sciences        | 1019 | (33.8) |
| Life and Physical Sciences                | 824  | (27.4) |
| Engineering and Applied Science           | 607  | (20.2) |
| Business                                  | 166  | (5.5)  |
| Computing                                 | 93   | (3.1)  |
| Nursing                                   | 92   | (3.1)  |
| Health Sciences                           | 64   | (2.1)  |
| Law                                       | 74   | (2.5)  |
| Medicine                                  | 74   | (2.5)  |
| <b>Year of Study</b>                      |      |        |
| Incoming                                  | 765  | (25.4) |
| First                                     | 721  | (23.9) |
| Second                                    | 517  | (17.2) |
| Third                                     | 536  | (17.8) |
| Fourth                                    | 369  | (12.3) |
| Fifth or Sixth                            | 105  | (3.5)  |
| <b>International/Domestic Status</b>      |      |        |
| Domestic                                  | 2788 | (92.5) |
| International                             | 225  | (7.5)  |
| <b>Knowledge level on COVID-19</b>        |      |        |
| 1 (Very poor) to 3                        | 209  | (6.9)  |
| 4                                         | 664  | (22.0) |
| 5 to 7 (Very good)                        | 2140 | (71.0) |
| <b>Following COVID-19 recommendations</b> |      |        |
| 1 (Not at all) to 3                       | 91   | (3.0)  |
| 4                                         | 203  | (6.7)  |
| 5 to 7 (Very much so)                     | 2719 | (90.2) |
| <b>Approach to self-isolation</b>         |      |        |
| No change/ life as usual                  | 125  | (4.0)  |
| Minor change but not isolation            | 1075 | (34.2) |
| Self-isolation                            | 1946 | (61.9) |

## COVID-19 Impact on University Students

### 3.2 Knowledge about COVID-19 and associated experiences

Overall, Queen's students rated their knowledge of COVID-19 as good to very good (Mean=5.0 out of 7, SD=1.1). Most reported following government recommendations (90%  $\geq 5$  out of 7). Female students were more likely than males to report following recommendations (91.3% vs 86.7%,  $p < 0.01$ ). Average knowledge levels (Mean=4.9, SD=1.1) and following of recommendations (87.3%) were lowest in students aged 18 and younger and highest in students aged 21 and older (Mean=5.2, SD=1.0; 93.3%). Most students (61.9%) reported self-isolating, defined here as "staying at home and avoiding contact with people outside of your household" (Table 1). A minority reported continuing to live life as normal ( $n = 125$  (4.0%)). Females were more likely to report self-isolating (63.9% vs 57.0%,  $\chi^2 p < 0.01$ ), and males were more likely to report no change in behaviour (8.0% vs 2.3%,  $\chi^2 p < 0.01$ ). There was no significant difference in self-isolation practices by age.

### 3.3 COVID-19 related worries

Responses to the COVID-19 Pandemic Anxiety Scale (Figure 1) showed that almost all Queen's students agreed that COVID-19 is a serious issue (93.7%). Although many students reported concerns about catching COVID-19 (48.1%), a greater proportion were worried about infecting others (64.0%), or friends and family catching it (74.9%). Few students reported being afraid to leave the house (14.7%), and most were not worried about access to food and essential items (87.6%). Worries about catching and transmitting COVID-19 were greatest in females, older students, and upper years of study (Table 2). These overall trends and differences between females and males were consistent with responses from first-year Oxford students (Figure 2; Supplemental Table 1).

Most Queen's students reported concerns about missing university (67.8%), with younger students most worried (age 18 or younger= 80.4%, age 19-20= 72.1%, and age 21 or older= 47.7%;  $\chi^2 p < 0.01$ ). Many students reported worries about their finances (58.4%), and long-term academic and job prospects (78.9%). Male and incoming students were less worried about the impact on finances and long-term prospects than female and current students (Table 2). Oxford student responses to the Pandemic Anxiety Scale were largely consistent with Queen's student responses, except for a smaller percentage of Oxford students reporting concerns about finances (26.5%) and long-term academic and job prospects (50.4%, Figure 2). Consistent with Queen's, females at Oxford were more worried about their finances and long-term prospects than males (Supplemental Table 1).

[INSERT FIGURE 1 HERE]

[INSERT FIGURE 2 HERE]

## COVID-19 Impact on University Students

**Table 2.** Queen's University percentage ratings on the COVID-19 Pandemic Anxiety Scale items by gender, age group, and year of study

|                                                                                         | Gender |        |      | Age Group |       |      |      | Year of Study |                                  |                  |      |
|-----------------------------------------------------------------------------------------|--------|--------|------|-----------|-------|------|------|---------------|----------------------------------|------------------|------|
|                                                                                         | Male   | Female | p*   | ≤18       | 19-20 | ≥21  | p*   | Incoming      | 1 <sup>st</sup> /2 <sup>nd</sup> | ≥3 <sup>rd</sup> | p*   |
| Think COVID-19 is a very serious issue                                                  |        |        |      |           |       |      |      |               |                                  |                  |      |
| Agree                                                                                   | 90.5   | 94.9   | <.01 | 91.6      | 94.8  | 95.5 | <.01 | 91.8          | 92.8                             | 96.1             | <.01 |
| Neutral                                                                                 | 4.3    | 2.8    |      | 4.4       | 2.5   | 2.2  |      | 4.7           | 3.5                              | 1.8              |      |
| Disagree                                                                                | 5.2    | 2.3    |      | 4.0       | 2.6   | 2.3  |      | 3.5           | 3.7                              | 2.1              |      |
| Worried that I will catch COVID-19                                                      |        |        |      |           |       |      |      |               |                                  |                  |      |
| Agree                                                                                   | 38.2   | 52.1   | <.01 | 43.6      | 50.7  | 51.7 | <.01 | 38.4          | 49.6                             | 53.5             | <.01 |
| Neutral                                                                                 | 28.1   | 25.6   |      | 28.7      | 23.5  | 26.2 |      | 32.2          | 24.9                             | 23.5             |      |
| Disagree                                                                                | 33.8   | 22.3   |      | 27.7      | 25.9  | 22.1 |      | 29.4          | 25.5                             | 23.1             |      |
| Worried friends and family will catch COVID-19                                          |        |        |      |           |       |      |      |               |                                  |                  |      |
| Agree                                                                                   | 67.5   | 78.1   | <.01 | 68.4      | 78.4  | 80.8 | <.01 | 65.1          | 75.3                             | 82.0             | <.01 |
| Neutral                                                                                 | 16.0   | 13.2   |      | 17.0      | 12.0  | 12.2 |      | 19.2          | 14.1                             | 10.1             |      |
| Disagree                                                                                | 16.5   | 8.7    |      | 14.6      | 9.6   | 7.0  |      | 15.7          | 10.6                             | 7.9              |      |
| I am afraid to leave the house right now                                                |        |        |      |           |       |      |      |               |                                  |                  |      |
| Agree                                                                                   | 9.3    | 16.6   | <.01 | 12.2      | 16.4  | 16.3 | 0.01 | 9.4           | 16.0                             | 17.0             | <.01 |
| Neutral                                                                                 | 15.1   | 19.4   |      | 17.4      | 17.8  | 19.5 |      | 16.6          | 18.6                             | 18.4             |      |
| Disagree                                                                                | 75.6   | 64.0   |      | 70.5      | 65.8  | 64.2 |      | 74.0          | 65.4                             | 64.6             |      |
| I am worried that I might transmit the infection to someone else                        |        |        |      |           |       |      |      |               |                                  |                  |      |
| Agree                                                                                   | 54.2   | 67.7   | <.01 | 58.4      | 66.6  | 69.4 | <.01 | 51.2          | 66.6                             | 70.4             | <.01 |
| Neutral                                                                                 | 18.8   | 16.2   |      | 18.6      | 16.0  | 15.2 |      | 22.1          | 14.9                             | 15.3             |      |
| Disagree                                                                                | 27.0   | 16.0   |      | 23.0      | 17.4  | 15.4 |      | 26.7          | 18.5                             | 14.4             |      |
| I am worried I will not have enough food and other essential items during the outbreak  |        |        |      |           |       |      |      |               |                                  |                  |      |
| Agree                                                                                   | 4.6    | 4.6    | 0.12 | 4.0       | 4.0   | 6.9  | 0.02 | 3.5           | 5.0                              | 5.2              | 0.37 |
| Neutral                                                                                 | 6.1    | 8.4    |      | 7.1       | 8.1   | 8.2  |      | 6.9           | 8.2                              | 7.8              |      |
| Disagree                                                                                | 89.2   | 87.0   |      | 88.9      | 88.0  | 84.9 |      | 89.5          | 86.8                             | 87.0             |      |
| I am worried about missing university                                                   |        |        |      |           |       |      |      |               |                                  |                  |      |
| Agree                                                                                   | 63.8   | 69.5   | <.01 | 79.7      | 71.2  | 43.1 | <.01 | 79.9          | 73.4                             | 51.9             | <.01 |
| Neutral                                                                                 | 12.6   | 12.6   |      | 9.7       | 11.5  | 19.2 |      | 9.7           | 11.2                             | 16.5             |      |
| Disagree                                                                                | 23.5   | 17.9   |      | 10.6      | 17.3  | 37.7 |      | 10.5          | 15.4                             | 31.6             |      |
| I am worried about the impact on my finances                                            |        |        |      |           |       |      |      |               |                                  |                  |      |
| Agree                                                                                   | 50.0   | 61.6   | <.01 | 53.8      | 61.8  | 61.5 | <.01 | 47.1          | 63.2                             | 61.3             | <.01 |
| Neutral                                                                                 | 18.8   | 15.8   |      | 19.7      | 14.7  | 14.0 |      | 22.5          | 14.9                             | 14.1             |      |
| Disagree                                                                                | 31.2   | 22.6   |      | 26.5      | 23.5  | 24.6 |      | 30.5          | 21.9                             | 24.7             |      |
| I am worried about the long-term impact this will have on my academic and job prospects |        |        |      |           |       |      |      |               |                                  |                  |      |
| Agree                                                                                   | 72.7   | 81.4   | <.01 | 77.7      | 80.8  | 78.1 | 0.09 | 74.8          | 80.3                             | 80.3             | <.01 |
| Neutral                                                                                 | 10.1   | 8.9    |      | 10.9      | 7.9   | 8.8  |      | 12.0          | 9.4                              | 7.2              |      |
| Disagree                                                                                | 17.2   | 9.7    |      | 11.4      | 11.3  | 13.2 |      | 13.2          | 10.3                             | 12.5             |      |

Notes: (1) \*p-value for chi-square test, (2) sample sizes by strata are: 868 males and 2,111 females; 1,222 ≤18, 1,062 ages 19-20, and 729 ≥21; 765 Incoming, 1,238 1<sup>st</sup>/2<sup>nd</sup> year, and 1,010 ≥3<sup>rd</sup> year.

## COVID-19 Impact on University Students

### 3.4 Impact of COVID-19

#### 3.4.1 Effects on university and studies

Queen's students commonly reported that the pandemic had negatively impacted their studies (69.9%) (Figure 1). While most students reported neither a positive nor negative impact on their plans to continue at university (61.5%), a notable proportion reported a negative impact (29.4%). Incoming students were more likely to report a negative impact than current students (Table 3). Both positive (22.8%) and negative (27.8%) impact on grades was reported. Most students perceived online learning negatively (61.2%), and reported a negative impact on their prospects for internships, exchanges, and other enriched learning experiences (68.0%). These findings were largely consistent with Oxford students' responses. However, a smaller proportion of Oxford students reported a negative impact on plans to continue at university (14.2%), and negative perceptions of online learning (30.4%; Figure 2; Supplemental Table 2).

#### 3.4.2 Employment and finances

Most students at Queen's (69.3%) and Oxford (72.6%) reported a negative impact on their prospects for summer employment. A greater proportion of females than males reported a negative impact at Queen's (71.4% vs 65.3%,  $p < 0.01$ ) and Oxford (77.5% vs 63.6%,  $p = 0.02$ ) (Table 3, Supplemental Table 2). A third of Queen's students reported a negative impact on their prospects to achieve their career aspirations (37.8%). Students in later years of study reported a more negative impact on their career aspirations ( $\chi^2 p < 0.05$ ). Most students reported a negative impact on their finances (51.8%), and few reported a negative impact on their ability to access food and essentials (10.7%). The perceived negative impact on employment prospects and finances was greatest in females, older students, and students in upper years of study (Table 3).

#### 3.4.3 Exercise, leisure and social life

Queen's students reported both a negative (42.9%) and positive (30.3%) impact on ability to exercise, but most reported a negative impact on hobbies and leisure activities (56.4%). These findings were consistent with Oxford students (Figure 2). Most students reported a negative impact on their social life (74.0%). While many students reported neither a positive nor negative impact on relationships with family members (41.6%), several reported a negative impact (24.9%). A negative impact on family relationships was more commonly reported by females (Table 3)

## COVID-19 Impact on University Students

**Table 3.** Queen's University percentage reporting by gender, age group and year of study. *Could you describe the impact that the COVID-19 pandemic and associated social distancing have had on:*

|                                                                    | Gender |        |      | Age Group |       |      |      | Year of Study |                                  |                  |      |
|--------------------------------------------------------------------|--------|--------|------|-----------|-------|------|------|---------------|----------------------------------|------------------|------|
|                                                                    | Male   | Female | p*   | ≤18       | 19-20 | ≥21  | p*   | Incoming      | 1 <sup>st</sup> /2 <sup>nd</sup> | ≥3 <sup>rd</sup> | p*   |
| Your university studies?                                           |        |        |      |           |       |      |      |               |                                  |                  |      |
| Negative                                                           | 65.2   | 71.8   | <.01 | 67.2      | 73.7  | 68.7 | <.01 | 60.1          | 74.7                             | 71.3             | <.01 |
| Neutral                                                            | 28.3   | 22.9   |      | 28.3      | 20.5  | 23.7 |      | 34.8          | 20.0                             | 22.2             |      |
| Positive                                                           | 6.5    | 5.3    |      | 4.5       | 5.7   | 7.5  |      | 5.1           | 5.3                              | 6.5              |      |
| Your plans to continue at university?                              |        |        |      |           |       |      |      |               |                                  |                  |      |
| Negative                                                           | 28.5   | 29.4   | 0.14 | 31.4      | 31.5  | 23.2 | <.01 | 33.1          | 28.6                             | 27.7             | <.01 |
| Neutral                                                            | 60.8   | 62.2   |      | 58.2      | 60.2  | 69.1 |      | 54.8          | 62.7                             | 65.2             |      |
| Positive                                                           | 10.7   | 8.4    |      | 10.4      | 8.4   | 7.7  |      | 12.2          | 8.7                              | 7.0              |      |
| Your perception of online/remote learning?                         |        |        |      |           |       |      |      |               |                                  |                  |      |
| Negative                                                           | 61.1   | 61.3   | 0.37 | 62.8      | 64.0  | 54.5 | <.01 | 61.0          | 61.4                             | 61.1             | 0.99 |
| Neutral                                                            | 23.1   | 24.7   |      | 22.1      | 23.8  | 27.9 |      | 24.1          | 23.8                             | 24.5             |      |
| Positive                                                           | 15.8   | 14.0   |      | 15.1      | 12.2  | 17.7 |      | 14.9          | 14.8                             | 14.5             |      |
| Your academic grades?                                              |        |        |      |           |       |      |      |               |                                  |                  |      |
| Negative                                                           | 29.0   | 27.2   | 0.23 | 27.3      | 30.7  | 24.3 | <.01 | 21.7          | 32.1                             | 27.0             | <.01 |
| Neutral                                                            | 46.9   | 50.3   |      | 46.9      | 47.7  | 56.0 |      | 50.6          | 46.4                             | 52.1             |      |
| Positive                                                           | 24.1   | 22.5   |      | 25.8      | 21.6  | 19.8 |      | 27.7          | 21.4                             | 20.9             |      |
| Your prospects for summer internships/exchanges/academic pursuits? |        |        |      |           |       |      |      |               |                                  |                  |      |
| Negative                                                           | 63.9   | 69.8   | 0.01 | 64.3      | 73.9  | 65.6 | <.01 | 56.7          | 74.3                             | 68.8             | <.01 |
| Neutral                                                            | 32.0   | 26.8   |      | 31.8      | 21.8  | 31.7 |      | 38.8          | 22.0                             | 27.9             |      |
| Positive                                                           | 4.1    | 3.5    |      | 3.9       | 4.3   | 2.7  |      | 4.4           | 3.7                              | 3.3              |      |
| Your prospects for summer employment?                              |        |        |      |           |       |      |      |               |                                  |                  |      |
| Negative                                                           | 65.3   | 71.4   | <.01 | 68.5      | 71.4  | 67.6 | <.01 | 62.2          | 73.7                             | 69.3             | <.01 |
| Neutral                                                            | 27.2   | 23.0   |      | 23.7      | 22.3  | 28.5 |      | 28.8          | 20.6                             | 25.6             |      |
| Positive                                                           | 7.5    | 5.7    |      | 7.9       | 6.3   | 3.8  |      | 9.0           | 5.7                              | 5.0              |      |
| Your prospects to realize your career aspirations?                 |        |        |      |           |       |      |      |               |                                  |                  |      |
| Negative                                                           | 33.8   | 39.4   | 0.01 | 29.4      | 42.0  | 45.8 | <.01 | 25.4          | 38.7                             | 46.1             | <.01 |
| Neutral                                                            | 57.8   | 53.9   |      | 62.4      | 50.4  | 48.6 |      | 65.9          | 54.3                             | 47.1             |      |
| Positive                                                           | 8.5    | 6.8    |      | 8.2       | 7.6   | 5.6  |      | 8.8           | 7.0                              | 6.7              |      |
| Your finances?                                                     |        |        |      |           |       |      |      |               |                                  |                  |      |
| Negative                                                           | 46.4   | 54.1   | <.01 | 46.0      | 55.7  | 56.0 | <.01 | 40.3          | 56.5                             | 54.9             | <.01 |
| Neutral                                                            | 41.7   | 36.5   |      | 43.0      | 35.1  | 33.7 |      | 47.2          | 35.1                             | 34.7             |      |
| Positive                                                           | 11.9   | 9.3    |      | 11.0      | 9.2   | 10.3 |      | 12.5          | 8.5                              | 10.5             |      |
| Your ability to access enough food or other essential items?       |        |        |      |           |       |      |      |               |                                  |                  |      |
| Negative                                                           | 10.2   | 10.9   | 0.86 | 8.3       | 12.2  | 12.6 | <.01 | 9.0           | 10.3                             | 12.4             | 0.02 |
| Neutral                                                            | 81.0   | 80.6   |      | 82.3      | 78.4  | 81.5 |      | 80.0          | 81.8                             | 80.0             |      |
| Positive                                                           | 8.8    | 8.6    |      | 9.4       | 9.4   | 5.9  |      | 11.0          | 7.8                              | 7.6              |      |
| Your ability to exercise?                                          |        |        |      |           |       |      |      |               |                                  |                  |      |
| Negative                                                           | 46.6   | 41.1   | <.01 | 40.4      | 42.7  | 47.5 | 0.01 | 40.4          | 42.0                             | 45.9             | 0.02 |
| Neutral                                                            | 27.5   | 26.5   |      | 26.2      | 28.8  | 25.0 |      | 25.9          | 28.9                             | 25.0             |      |
| Positive                                                           | 25.9   | 32.4   |      | 33.4      | 28.5  | 27.6 |      | 33.7          | 29.1                             | 29.1             |      |
| Your ability to participate in hobbies/leisure activities?         |        |        |      |           |       |      |      |               |                                  |                  |      |
| Negative                                                           | 57.1   | 56.3   | <.01 | 54.1      | 58.2  | 57.8 | 0.02 | 55.7          | 56.1                             | 57.3             | 0.96 |
| Neutral                                                            | 20.5   | 14.7   |      | 15.7      | 17.6  | 15.5 |      | 16.3          | 16.6                             | 16.0             |      |
| Positive                                                           | 22.4   | 29.1   |      | 30.2      | 24.2  | 26.8 |      | 28.0          | 27.3                             | 26.6             |      |
| Your ability to connect with your friends and your social life?    |        |        |      |           |       |      |      |               |                                  |                  |      |
| Negative                                                           | 72.7   | 74.6   | 0.56 | 70.8      | 77.2  | 74.9 | <.01 | 68.8          | 75.7                             | 76.0             | <.01 |
| Neutral                                                            | 16.8   | 15.5   |      | 16.2      | 14.8  | 17.2 |      | 17.9          | 14.5                             | 16.2             |      |
| Positive                                                           | 10.4   | 9.9    |      | 13.0      | 8.0   | 8.0  |      | 13.3          | 9.9                              | 7.7              |      |
| Your relationships with your family members?                       |        |        |      |           |       |      |      |               |                                  |                  |      |
| Negative                                                           | 20.2   | 26.6   | <.01 | 24.6      | 24.4  | 26.1 | 0.44 | 23.1          | 26.4                             | 24.4             | 0.22 |
| Neutral                                                            | 48.3   | 39.0   |      | 40.1      | 42.8  | 42.4 |      | 43.0          | 39.3                             | 43.4             |      |

## COVID-19 Impact on University Students

| Positive | 31.6 | 34.4 | 35.3 | 32.9 | 31.6 | 33.9 | 34.3 | 32.3 |
|----------|------|------|------|------|------|------|------|------|
|----------|------|------|------|------|------|------|------|------|

Notes: (1) \*p-value for chi-square test, (2) sample size by strata: 868 males and 2,111 females; 1,222  $\leq 18$ , 1,062 ages 19-20, and 729  $\geq 21$ ); 765 Incoming, 1,238 1<sup>st</sup>/2<sup>nd</sup> year, and 1,010  $\geq 3$ <sup>rd</sup> year.

### 3.4.4 Receipt of Mental Health Support

Among Queen's students who receive mental health support (n=1,256), most reported this was unaffected by COVID-19 (66.9%). However, significantly more females reported their support being negatively affected than males (37.4% of females, 18.2% of males,  $\chi^2$  p<0.005). There was no significant difference in the proportions of students reporting a negative impact according to age or year of study.

### 3.5 Common Pandemic Impact Themes – Qualitative analysis

Free text responses to an open-ended question asking Queen's (n= 815) and Oxford (n= 60) students to describe other impacts related to COVID-19 were analysed for major themes. See Supplemental Materials Appendix A1 for representative quotes.

#### 3.5.1 Negative impact due to social isolation

Many students (56.0% Queen's, 33.3% Oxford) described feelings of anxiety, loneliness, and restlessness associated with social isolation due to loss of in-person contact with peers, friends, and significant others. Many students described friends as key supports, and that reduced contact worsened their well-being: "Forced separation from part of my support system has had a negative impact on both my academics and mental health". Students reported that isolation with roommates or family members, with whom they had already-strained relationships, increased stress and caused feelings of being trapped in a negative environment which worsened mental health: "Having no break from my fairly stressful home situation has not been great for my mental health". Overall, reduced interaction with support networks and forced confinement increased stress.

#### 3.5.2 Challenging academic and institutional changes

Students described challenges adapting to new learning methods (32.1% of Queen's students, 23.3% of Oxford students). Online learning was reported as difficult or less effective than in-person instruction due to lack of quiet study spaces, blurred school and home boundaries, and distance from peers: "Getting myself into an exam or essay-writing mindset at home is much harder than I thought it would be". Students reported difficulty coping with high work demands outside their usual surroundings, isolated from peers during a stressful time: "I am finding it hard to keep a balanced perspective on work and assignments working at home by myself and not being around friends". Concerns about learning experiences and future preparedness stemmed from loss of practical course components, cancellation of professional placements, and reduced access to specialized facilities. The cancellation of key milestones contributed to worries about personal development and the quality of students' social experience at university. Responses concerning institutional pandemic responses were mixed, including understanding given the circumstances, and frustration with decisions regarding tuition, campus closure, and a perceived lack of support.



## COVID-19 Impact on University Students

### 3.5.3 Financial Challenges

Some Queen's students (11.4%), but no Oxford students, expressed specific financial concerns. These included frustration and anxiety regarding reduced income due to fewer career opportunities and employment termination, and expenses due to student housing and university tuition fees. Reduced income combined with maintained expenses amplified financial stress.

### 3.5.4 Disruptions to support services and means of coping

A small proportion of students (5.6% Queen's, 5.0% Oxford) described disrupted access to health and support services, including difficulties accessing medication and obtaining healthcare appointments and in-person counselling. Fear of accessing services in-person due to risk of COVID-19 exposure was reported as impeding usual care: "Too afraid to visit hospital for routine problems". Students described reluctance to use online services, outlining difficulties adapting to or navigating them. Reduced engagement in leisure or physical group activities usually key to managing stress and protective for mental health was reported as negatively impacting the ability to cope: "It has removed my ability to train for my sport which was a crucial part of my weekly structure 6 days a week, and was critical in my being able to maintain my mental health and work/study productively".

## 4 Discussion

The COVID-19 pandemic has caused major disruption to university and has had far-reaching impacts on students' daily lives, well-being and perception of their future. Our study explored undergraduate student experiences and worries in the early part of the pandemic, and the associated impact on their education, daily life, career prospects and mental health support. To our knowledge, this is the first study to compare the impact of the pandemic on university students across different countries. We hope that this information can be used to support students during and beyond the pandemic.

Nearly all students across both universities agreed that COVID-19 is a serious issue, but females were more likely than males to report following government recommendations and adapting their lifestyle. This may be partly due to increased anxiety among female students. Screening positive for anxiety and depression has been found to be higher in female university students and females of similar age in the general population when compared to males.[4,5,12] Moreover, females appear more susceptible to anxiety and depression surrounding COVID-19,[13-15] and are more likely to follow COVID-19-related public health guidelines.[16] In our study a greater proportion of females reported worries and concerns around the pandemic than males according to the Pandemic Anxiety Scale.

Younger students were significantly more likely to report concerns about missing university than older students, who were more likely to be worried about the impact on their career prospects. This may reflect different priorities: missing university is a more immediate concern for younger students who are years away from graduating. In contrast, older students may be more concerned about applying for jobs at a time where workers are being furloughed or made redundant, and employment rates are falling.[17-18] This is supported by consistent concern about long-term academic and job prospects across age groups, and our qualitative analysis. Queen's, but not Oxford students discussed concerns surrounding employment, which may reflect the older students in the Queen's sample. Overall, students at different stages of study require targeted approaches to address immediate concerns regarding future academic or career prospects.

## COVID-19 Impact on University Students

While students expressed worries about catching COVID-19, many more were worried about infecting others, or friends and family contracting it. Most students are relatively young with few co-morbidities and therefore at low-risk for severe COVID-19 disease but may have family members at higher risk due to their age and co-morbidities.[19] This is important for decisions regarding bringing students to campus, as students may worry about returning home and potentially exposing family or friends in high-risk groups to COVID-19. The UK government introduced plans for university students to receive COVID-19 tests before returning home for Christmas, which may have allayed students' worries about exposing family members to COVID-19, but was challenging for students who tested positive and were required to isolate.

Several students at expressed concern about the impact of the pandemic on their finances. A smaller proportion of Oxford students reported these concerns compared to Queen's students, which may be associated with differences in year of study and concerns about employment after graduation. Our qualitative analysis supported the contribution of mandatory continued payment for university accommodation and tuition with reduced perceived value, and loss of income to financial anxiety.[20] Additionally, many students rely on their ability to work part-time or seasonally, or money from family members whose income may have been negatively affected by the pandemic. Previous studies have indicated student concern about finances during COVID-19, particularly those remaining in student residences during lockdown.[21]

Most students indicated that COVID-19 negatively impacted their studies, as may be expected due to online learning or course suspension. Negative perceptions of online learning suggest dissatisfaction with alternative teaching methods, which may be worsened by unchanged tuition fees and how quickly these changes were introduced. However, most Queen's students reported little impact on grades, suggesting disruption is accounted for in assessments, that students and/or professors are adapting to maintain grades, or it is too early to measure the impact on academic performance. Negative perceptions of online learning were lower in the Oxford sample than in Queen's students (30.9% vs 61.2%). This could reflect the move to online learning in Oxford taking place when the majority of first year students would ordinarily have been sitting exams. The tutorial system at Oxford may also be more readily transferred online. Finally, on-line learning may have been more prevalent at Oxford pre-pandemic, requiring less adjustment for teaching to move fully online during the pandemic. Nearly 30% of Queen's students and 15% of Oxford students reported a negative impact on their plans to continue at university. This may suggest students are more likely to discontinue their studies due to the pandemic, and would have significant repercussions for universities' income. Most students also reported a negative impact on their prospects for summer internships, employment, learning exchanges, and other academic pursuits. Explanations include travel restrictions, workplace closures, reluctance to employ non-essential workers, social distancing restrictions, and student concerns regarding COVID-19 exposure. Students' worries surrounding future academic and career prospects might be related to fewer opportunities compared to their predecessors, and increased competition on graduation with less work or academic experience. Reassuringly, most students reported no impact on their ability to access food and other essentials.

Students reported both positive and negative impacts on exercise. Disruption to routines, closure of gyms or lack of university sports societies cited in our qualitative analysis may account for the negative impact. More time to exercise, availability of online classes, and more space for exercise at home may account for the positive impact. Most students reported

## COVID-19 Impact on University Students

a negative impact on their participation in hobbies and leisure activities, and unsurprisingly, on their social life. The combination of these factors suggests a significant impact of COVID-19 on student mental well-being, given the importance of recreation, exercise and social connectedness to the support of mental health.[13,22]

Select populations, that may not be readily identified as requiring tailored support, reported unique challenges. Students with dependents described challenges balancing their studies and caring responsibilities due to reduced childcare services and closure of schools. International students reported inability to travel home to visit family and friends, and anxiety surrounding remaining in a foreign country during a pandemic. Affordability of remaining away from home, high tuition costs, and lack of financial support were concerns for these students.

Strengths of our study include providing timely, important information on a largely unknown and highly relevant topic: the impact of a global pandemic on the lives and experiences of university students. Responses from large, diverse samples of university students were utilized and allowed comparison between countries and institutions. Our findings build on those of previous studies that have focused specifically on mental health impacts,[15,23-25] or been limited to medical students or much smaller samples.[26-31] We assessed the impact of COVID-19 using a validated Pandemic Anxiety Scale.

One study limitation relates to the low response rate in the Queen's sample, which likely reflects the timing of the survey during summer break without a preceding student engagement campaign. Nonetheless, the student sample appeared broadly representative of the Queen's undergraduate population in terms of demographics and program of study. Secondly the Oxford data pertains only to first-year students and served as a descriptive exploratory analysis to compliment the Canadian data. That said, increased surveying of younger students may be more informative for higher education policies, as these students are more likely to be studying at university when these policies are enacted. In this analysis, students at both universities were surveyed early in the pandemic, and worries and impacts may change over the course of the pandemic. Therefore, we will repeatedly survey students at both universities to better understand student concerns and the impact of the pandemic on student experiences and well-being over time. We hope that this information will be helpful to inform universities as to how best to address student priority learning and well-being needs.

## 5 Conclusion

The COVID-19 pandemic has had wide-ranging impacts on university student experience and mental health. Our findings support that undergraduate students have concerns regarding disruptions to university studies, the inadequacies of online learning as a substitute for in-person learning, and their finances and future academic and career prospects. A concerning number of students reported the possibility of discontinuing their studies due to the pandemic. Many students reported negative impacts of COVID-19 on protective factors for well-being, including socializing, exercise, hobbies and leisure activities, family relationships, and mental health support. Higher education institutions must prepare to address students' concerns in the short term during the pandemic, and provide ongoing support for students in the aftermath of COVID-19 as the long-term impacts become apparent.

## COVID-19 Impact on University Students

### Figure legends

Figure 1: Queen's university students' (n=3,013) responses to the Pandemic Anxiety Scale items (Panel A), and items relating to the impact that COVID-19 and associated social distancing have had on various aspects of their lives (Panel B).

Figure 2: Oxford University first-year undergraduate students' (n= 339) responses to the Pandemic Anxiety Scale items (Panel A), and items relating to the impact that COVID-19 and associated social distancing have had on various aspects of their lives (Panel B).

### Contributors

AD developed the protocol in collaboration with colleagues including KEAS and students including DR, NK and SC. DR led the student engagement campaign at Queen's and SC and AD the survey launch, while CK supervised by AD and KEAS led the engagement and survey launch at Oxford. JA, NK and AD led the quantitative analysis, whilst KEAS, AB, JB and DR the qualitative analysis. All named authors contributed to the writing and reviewed the final manuscript.

### Acknowledgments

We acknowledge the important role of the student volunteers who worked on the Queen's Student Engagement campaign including Mimi Li and Anjalika Khan.

KEAS is supported by the NIHR Oxford Health Biomedical Research Centre (grant BRC-1215-20005).

### Competing interests

KEAS is supported by the NIHR Oxford Health Biomedical Research Centre (grant BRC-1215-20005). The views expressed are those of the authors and not necessarily those of the UK National Health Service, the National Institute for Health Research, or the UK Department of Health.

### Funding

This study was funded by an operating grant from the Canadian Institutes of Health Research (CIHR) PJT 165597.

### Data sharing statement

Deidentified raw data is available upon reasonable request to the corresponding author.

### Ethical approval

Ethical approval was obtained from the Central University Research Ethics Committee in Oxford (R60998 – RE001), and the Queens University Health Sciences and Affiliated Teaching Hospitals Research Ethics Board (HSREB) in Canada (PSIY-669-19). Participants gave informed consent as part of the survey.

## COVID-19 Impact on University Students

## References

- [1]Adhikari, S. P., Meng, S., Wu, Y. J., Mao, Y. P., Ye, R. X., Wang, Q. Z, et al. (2020). Epidemiology, causes, clinical manifestation and diagnosis, prevention and control of coronavirus disease (COVID-19) during the early outbreak period: a scoping review. *Infectious diseases of poverty*, 9(1), 29. <https://doi.org/10.1186/s40249-020-00646-x>
- [2]Pfefferbaum, B., & North, C. (2020). Mental health and the Covid-19 pandemic. *New England Journal of Medicine*, 383(6): 510–12. <https://doi.org/10.1056/nejmp2013466>.
- [3]Crawford, J., Butler-Henderson, K., Rudolph, J., Malkawi, B., Glowatz, M., Magni, P et al. (2020). COVID-19: 20 countries’ higher education intra-period digital pedagogy responses. *Journal of Applied Learning & Teaching*, 3(1). <https://doi.org/10.37074/jalt.2020.3.1.7>
- [4]King, N., Pickett, W., McNevin, S., Bowie, C., Rivera, D., Keown-Stoneman, C., et al. (2020). Mental health need of students at entry to university: Baseline findings from the U-Flourish Student Well-Being and Academic Success Study. *Early Intervention in Psychiatry*, 1–10. <https://doi.org/10.1111/eip.12939>
- [5]Duffy, A., Keown-Stoneman, C., Goodday, S., Horrocks, J., Lowe, M., King, N, et al. (2020). Predictors of mental health and academic outcomes in first-year university students: Identifying prevention and early-intervention targets. *BJPsych open*, 6(3), e46. <https://doi.org/10.1192/bjo.2020.24>
- [6]Goodday SM, Rivera D, Foran H, et al. (2019). U-Flourish university students well-being and academic success longitudinal study: a study protocol. *BMJ Open*, 9:e029854. doi:10.1136/ bmjopen-2019-029854
- [7]McElroy, E., Patalay, P., Moltrecht, B., Shevlin, M., Shum, A., Creswell, C., et al. (2020). Demographic and health factors associated with pandemic anxiety in the context of COVID-19. *British journal of health psychology*, 25(4), 934–944. <https://doi.org/10.1111/bjhp.12470>
- [8]RStudio Team (2020). RStudio: Integrated Development for R. RStudio, PBC, Boston, MA URL <http://www.rstudio.com/>.
- [9]Ritchie, J. & Spencer, L. 1994. Qualitative data analysis for applied policy research by Jane Ritchie and Liz Spencer in A. Bryman and R. G. Burgess [eds.] ‘Analysing qualitative data’, (pp.173-194). London: Routledge.
- [10]Gale, N. K., Heath, G., Cameron, E., Rashid, S. & Redwood, S. (2013). Using the framework method for the analysis of qualitative data in multi-disciplinary health research. *BMC Medical Research Methodology*, 13:117. <https://doi.org/10.1186/1471-2288-13-117>
- [11]von Elm E, Altman DG, Egger M, Pocock SJ, Gotsche PC, Vandenbroucke JP. 2007. The Strengthening the Reporting of Observational Studies in Epidemiology (STROBE) Statement: guidelines for reporting observational studies. *BMJ*, 335 doi: <https://doi.org/10.1136/bmj.39335.541782.AD>

## COVID-19 Impact on University Students

[12]McManus, S., Bebbington, P. E., Jenkins, R., Morgan, Z., Brown, L., Collinson, D., et al. (2020). Data Resource Profile: Adult Psychiatric Morbidity Survey (APMS). *International journal of epidemiology*, 49(2), 361–362e. <https://doi.org/10.1093/ije/dyz224>

[13]Xiong, J., Lipsitz, O., Nasri, F., Lui, L., Gill, H., Phan, L., et al. (2020). Impact of COVID-19 pandemic on mental health in the general population: A systematic review. *Journal of affective disorders*, 277, 55–64. <https://doi.org/10.1016/j.jad.2020.08.001>

[14]Smith, L., Jacob, L., Yakkundi, A., McDermott, D., Armstrong, N. C., Barnett, Y., et al. (2020). Correlates of symptoms of anxiety and depression and mental wellbeing associated with COVID-19: a cross-sectional study of UK-based respondents. *Psychiatry research*, 291, 113138. <https://doi.org/10.1016/j.psychres.2020.113138>

[15]Elmer, T., K. Mepham, and C. Stadtfeld. 2020. Students under Lockdown: Comparisons of Students' Social Networks and Mental Health before and during the COVID-19 Crisis in Switzerland. *PloS one*, 15 (7): e0236337. <https://doi.org/10.1371/journal.pone.0236337>

[16]Guzek, D., Skolmowska, D., & Głabska, D. (2020). Analysis of Gender-Dependent Personal Protective Behaviors in a National Sample: Polish Adolescents' COVID-19 Experience (PLACE-19) Study. *International journal of environmental research and public health*, 17(16), 5770. <https://doi.org/10.3390/ijerph17165770>

[17]Statistics Canada. 2020. Canadian Economic Dashboard and COVID-19 <https://www150.statcan.gc.ca/n1/pub/71-607-x/71-607-x2020009-eng.htm> [Accessed 31st October 2020]

[18]Office for National Statistics. 2020. Coronavirus (COVID-19) roundup: Economy, business and jobs. <https://www.ons.gov.uk/peoplepopulationandcommunity/healthandsocialcare/conditionsanddiseases/articles/coronaviruscovid19roundupeconomybusinessandjobs/2020-07-02#youngperson> [Accessed 31<sup>st</sup> October 2020]

[19]Clift, A.K., Coupland, C.A.C., Keogh, R.H., Diaz-Ordaz, K., Williamson, E. (2020). Living risk prediction algorithm (QCOVID) for risk of hospital admission and mortality from coronavirus 19 in adults: national derivation and validation cohort study. *BMJ*, 371, pp. m3731. <https://doi.org/10.1136/bmj.m3731>

[20]Office for National Statistics. 2020. Labour market overview, UK: October 2020. <https://www.ons.gov.uk/employmentandlabourmarket/peopleinwork/employmentandemployeetypes/bulletins/uklabourmarket/october2020> [Accessed 31st October 2020]

[21]Husky, M., Kovess-Masfety, V., & Swendsen, J. (2020). Stress and anxiety among university students in France during Covid-19 mandatory confinement. *Compr. Psychiatry* **102**, 152-191. doi: 10.1016/j.comppsy.2020.152191

[22]Rastegar Kazerooni, A., Amini, M., Tabari, P., & Moosavi, M. (2020). Peer mentoring for medical students during the COVID-19 pandemic via a social media platform. *Medical education*, 54(8), 762–763. <https://doi.org/10.1111/medu.14206>

[23]Copeland, William E., Ellen McGinnis, Yang Bai, Zoe Adams, Hilary Nardone, Vinay Devadanam, Jeffrey Rettew, and Jim J. Hudziak. 2021. Impact of COVID-19 Pandemic on College Student Mental Health and Wellness. *Journal of the American Academy of Child &*

## COVID-19 Impact on University Students

*Adolescent Psychiatry*, 60 (1): 134-141.e2.

<https://doi.org/https://doi.org/10.1016/j.jaac.2020.08.466>.

[24]Essadek, A., and T. Rabeyron. 2020. Mental Health of French Students during the Covid-19 Pandemic. *Journal of affective disorders*, 277 (December): 392–93. [https://doi.org/S0165-0327\(20\)32648-3](https://doi.org/S0165-0327(20)32648-3)

[25]Wathelet, M., S. Duhem, G. Vaiva, T. Baubet, E. Habran, E. Veerapa, C. Debien, et al. 2020. Factors Associated With Mental Health Disorders Among University Students in France Confined During the COVID-19 Pandemic. *JAMA network open*, 3 (10): e2025591. <https://doi.org/10.1001/jamanetworkopen.2020.25591> [doi].

[26]Alsoufi, A., A. Alsuyihili, A. Msherghi, A. Elhadi, H. Atiyah, A. Ashini, A. Ashwieb, et al. 2020. Impact of the COVID-19 Pandemic on Medical Education: Medical Students' Knowledge, Attitudes, and Practices Regarding Electronic Learning. *PloS one*, 15 (11): e0242905. <https://doi.org/10.1371/journal.pone.0242905> [doi].

[27]Byrnes, Y. M., A. M. Civantos, B. C. Go, T. L. McWilliams, and K. Rajasekaran. 2020. Effect of the COVID-19 Pandemic on Medical Student Career Perceptions: A National Survey Study. *Medical education online*, 25 (1): 1798088. <https://doi.org/10.1080/10872981.2020.1798088> [doi].

[28]Choi, B., L. Jegatheeswaran, A. Minocha, M. Alhilani, M. Nakhoul, and E. Mutengesa. 2020. The Impact of the COVID-19 Pandemic on Final Year Medical Students in the United Kingdom: A National Survey. *BMC medical education*, 20 (1): 206-020-02117–1. <https://doi.org/10.1186/s12909-020-02117-1> [doi].

[29]Keckojevic, A., C. H. Basch, M. Sullivan, and N. K. Davi. 2020. The Impact of the COVID-19 Epidemic on Mental Health of Undergraduate Students in New Jersey, Cross-Sectional Study. *PloS one*, 15 (9): e0239696. <https://doi.org/10.1371/journal.pone.0239696> [doi].

[30]Lyons, Z., H. Wilcox, L. Leung, and O. Dearsley. 2020. COVID-19 and the Mental Well-Being of Australian Medical Students: Impact, Concerns and Coping Strategies Used. *Australasian psychiatry : bulletin of Royal Australian and New Zealand College of Psychiatrists*, 28 (6): 649–52. <https://doi.org/10.1177/1039856220947945> [doi].

[31]Son, C., S. Hegde, A. Smith, X. Wang, and F. Sasangohar. 2020. Effects of COVID-19 on College Students' Mental Health in the United States: Interview Survey Study. *Journal of medical Internet research*, 22 (9): e21279. <https://doi.org/10.2196/21279> [doi].

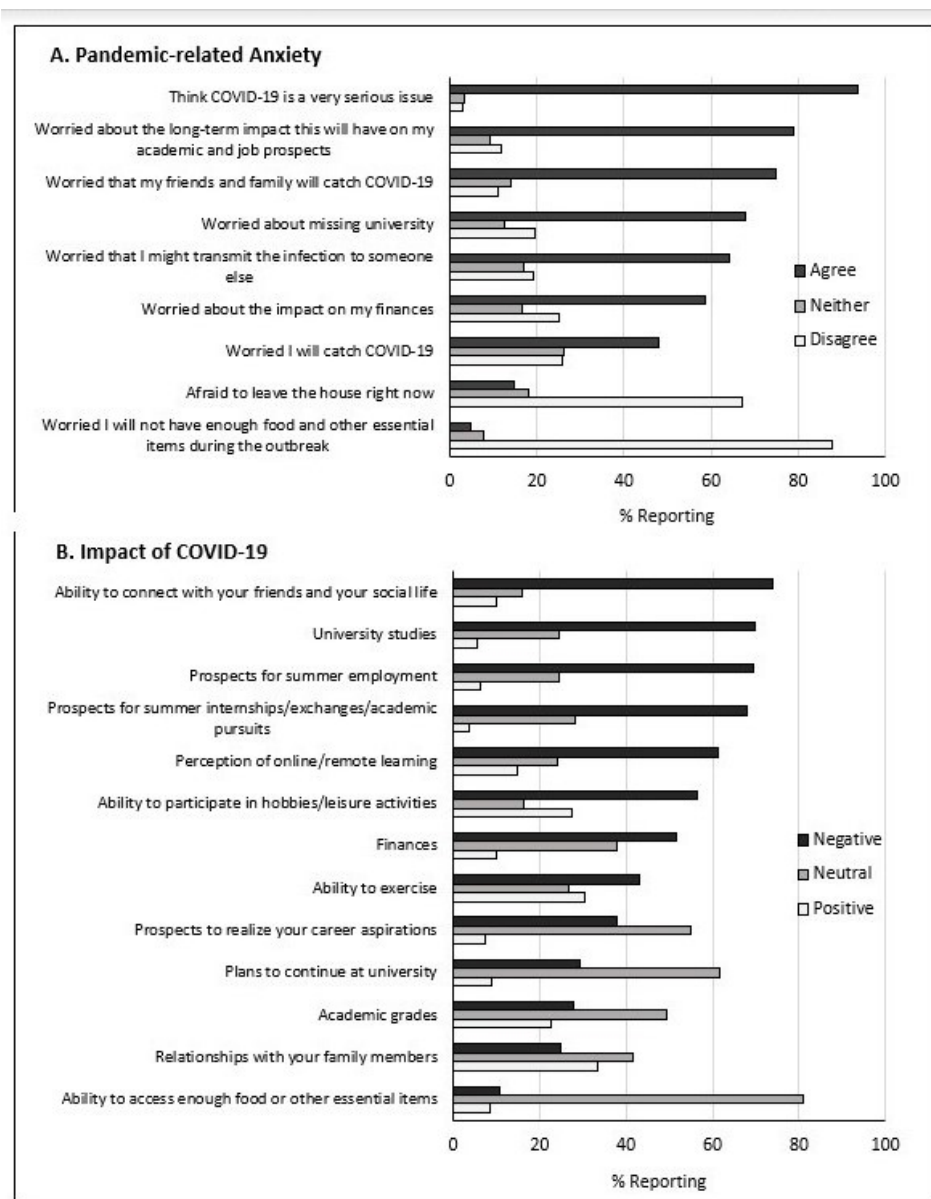

Figure 1: Queen's university students' (n=3,013) responses to the Pandemic Anxiety Scale items (Panel A), and items relating to the impact that COVID-19 and associated social distancing have had on various aspects of their lives (Panel B).

155x197mm (96 x 96 DPI)



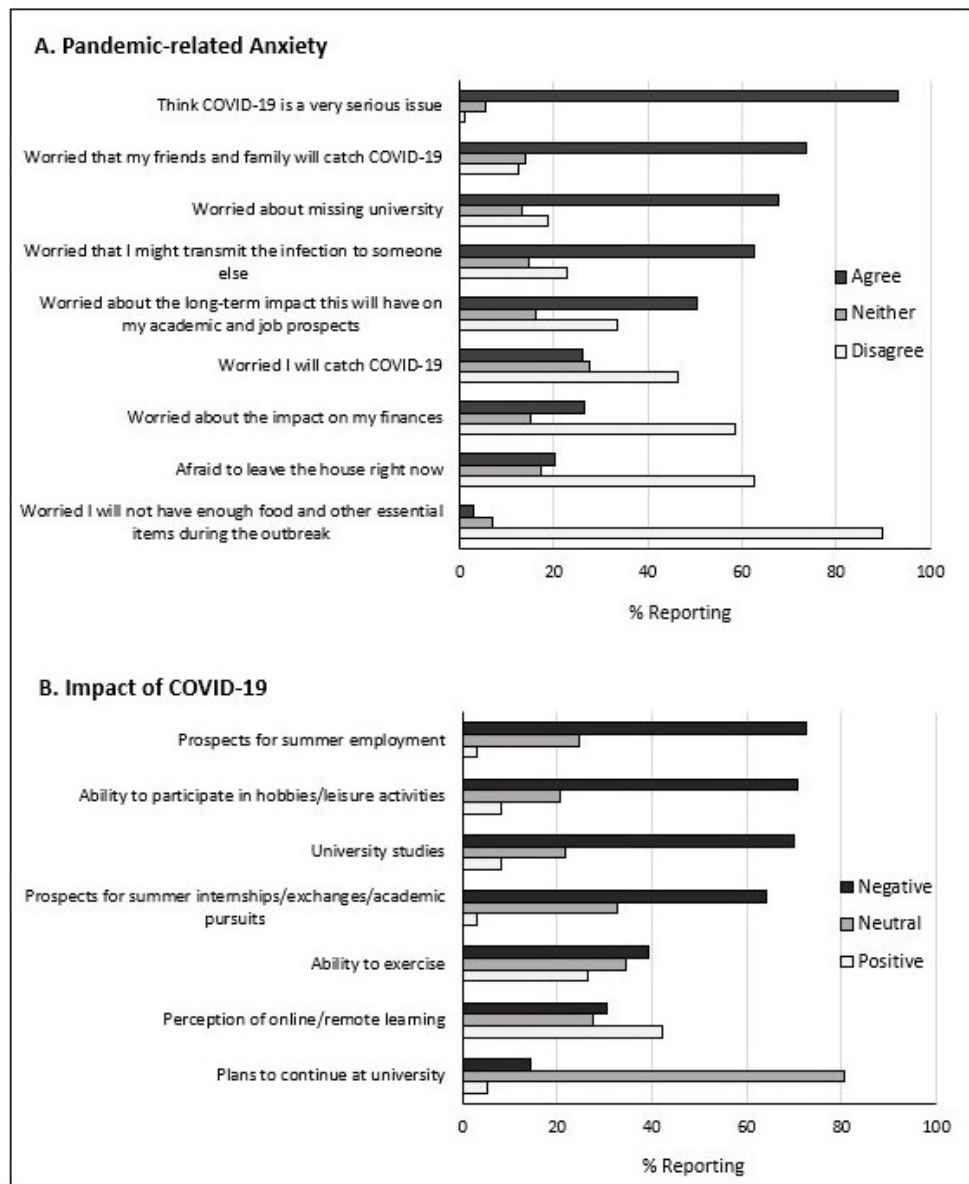

Figure 2. Oxford University first-year undergraduate students' (n= 339) responses to the Pandemic Anxiety Scale items (Panel A), and items relating to the impact that COVID-19 and associated social distancing have had on various aspects of their lives (Panel B).

152x182mm (96 x 96 DPI)

**Supplemental Table 1.** Oxford University first-year student percentage ratings on the COVID-19 Pandemic Anxiety Scale items overall and by gender

|                                                                                        | TOTAL<br>(n=339)* | GENDER          |                   | p**    |
|----------------------------------------------------------------------------------------|-------------------|-----------------|-------------------|--------|
|                                                                                        |                   | Male<br>(n=121) | Female<br>(n=209) |        |
| Think COVID-19 is a very serious issue                                                 |                   |                 |                   |        |
| Agree                                                                                  | 93.2              | 89.3            | 95.2              | 0.02   |
| Neutral                                                                                | 5.6               | 7.4             | 4.8               |        |
| Disagree                                                                               | 1.2               | 3.3             | 0                 |        |
| Worried that I will catch COVID-19                                                     |                   |                 |                   |        |
| Agree                                                                                  | 26.0              | 16.5            | 31.1              | 0.01   |
| Neutral                                                                                | 27.7              | 26.4            | 28.2              |        |
| Disagree                                                                               | 46.3              | 57.0            | 40.7              |        |
| Worried friends and family will catch COVID-19                                         |                   |                 |                   |        |
| Agree                                                                                  | 73.7              | 60.3            | 81.3              | <0.001 |
| Neutral                                                                                | 13.9              | 20.7            | 10.0              |        |
| Disagree                                                                               | 12.4              | 19.0            | 8.6               |        |
| I am afraid to leave the house right now                                               |                   |                 |                   |        |
| Agree                                                                                  | 20.1              | 10.7            | 24.4              | 0.004  |
| Neutral                                                                                | 17.4              | 15.7            | 18.7              |        |
| Disagree                                                                               | 62.5              | 73.6            | 56.9              |        |
| I am worried that I might transmit the infection to someone else                       |                   |                 |                   |        |
| Agree                                                                                  | 62.5              | 52.9            | 68.4              | 0.02   |
| Neutral                                                                                | 14.7              | 19.0            | 12.4              |        |
| Disagree                                                                               | 22.7              | 28.1            | 19.1              |        |
| I am worried I will not have enough food and other essential items during the outbreak |                   |                 |                   |        |
| Agree                                                                                  | 2.9               | 1.7             | 3.3               | 0.53   |
| Neutral                                                                                | 7.1               | 8.3             | 6.2               |        |
| Disagree                                                                               | 90.0              | 90.1            | 90.4              |        |
| I am worried about missing university                                                  |                   |                 |                   |        |
| Agree                                                                                  | 67.8              | 62.8            | 69.9              | 0.47   |
| Neutral                                                                                | 13.3              | 15.7            | 12.4              |        |
| Disagree                                                                               | 18.6              | 20.7            | 17.7              |        |
| I am worried about the impact on my finances                                           |                   |                 |                   |        |
| Agree                                                                                  | 26.5              | 19.0            | 31.6              | 0.04   |
| Neutral                                                                                | 15.0              | 15.7            | 14.8              |        |
| Disagree                                                                               | 58.4              | 65.3            | 53.6              |        |
| I am worried about the long-term impact on my academic and job prospects               |                   |                 |                   |        |
| Agree                                                                                  | 50.4              | 39.7            | 54.5              | 0.03   |
| Neutral                                                                                | 16.2              | 19.8            | 14.8              |        |
| Disagree                                                                               | 33.3              | 40.5            | 30.6              |        |

Notes: (1) \*not all participants reported gender, (2) \*\*p-value for chi-square test

**Supplemental Table 2.** Oxford University first-year student percentage reporting overall and by gender. *Could you describe the impact that the COVID-19 pandemic and associated social distancing have had on:*

|                                                                        | TOTAL<br>(n=339)* | GENDER          |                   | p**    |
|------------------------------------------------------------------------|-------------------|-----------------|-------------------|--------|
|                                                                        |                   | Male<br>(n=121) | Female<br>(n=209) |        |
| Your university studies?                                               |                   |                 |                   |        |
| Negative                                                               | 69.9              | 70.2            | 69.4              | 0.90   |
| Neutral                                                                | 21.8              | 20.7            | 22.5              |        |
| Positive                                                               | 8.3               | 9.1             | 8.1               |        |
| Your plans to continue at university?                                  |                   |                 |                   |        |
| Negative                                                               | 14.2              | 5.0             | 19.6              | <0.001 |
| Neutral                                                                | 80.5              | 90.9            | 74.2              |        |
| Positive                                                               | 5.3               | 4.1             | 6.2               |        |
| Your perception of online/remote learning                              |                   |                 |                   |        |
| Negative                                                               | 30.4              | 25.6            | 33.5              | 0.046  |
| Neutral                                                                | 27.4              | 34.7            | 22.5              |        |
| Positive                                                               | 42.2              | 39.7            | 44.0              |        |
| Your prospects for summer internships/exchanges/academic pursuits?     |                   |                 |                   |        |
| Negative                                                               | 64.0              | 62.0            | 64.1              | 0.33   |
| Neutral                                                                | 32.7              | 36.4            | 31.6              |        |
| Positive                                                               | 3.2               | 1.7             | 4.3               |        |
| Your prospects for summer employment?                                  |                   |                 |                   |        |
| Negative                                                               | 72.6              | 63.6            | 77.5              | 0.02   |
| Neutral                                                                | 24.5              | 31.4            | 20.6              |        |
| Positive                                                               | 2.9               | 5.0             | 1.9               |        |
| Your ability to exercise?                                              |                   |                 |                   |        |
| Negative                                                               | 39.2              | 43.8            | 37.3              | 0.17   |
| Neutral                                                                | 34.5              | 35.5            | 32.5              |        |
| Positive                                                               | 26.3              | 20.7            | 30.1              |        |
| Your ability to participate in your usual hobbies/ leisure activities? |                   |                 |                   |        |
| Negative                                                               | 70.8              | 67.8            | 73.2              | 0.49   |
| Neutral                                                                | 20.6              | 24.0            | 18.7              |        |
| Positive                                                               | 8.3               | 7.4             | 8.1               |        |

Notes: (1) \*not all participants reported gender, (2) \*\*p-value for chi-square test

## Supplemental Materials Appendix A1: Quotes from qualitative data analysis of free text responses

### *Social isolation*

“I highly depend on social environments to support my mental health, so not being able to see friends is quite challenging as it makes my depression worse”

“Forced separation from part of my support system has had a negative impact on both my academics and mental health”

“Impacts of the pandemic on family members have reverberating effects to all members of household”

“Being stuck in a house with my parents has negatively impacted my mental health”

“I have to be near my emotionally abusive mother, I self harm a lot more now and I really need access to university student wellness center but I cannot call them while here”

“I've been feeling more lonely and restless with the pandemic going on. There are less outlets to relax due to isolation (ie sports leagues, meeting with friends, etc.)”

“As much as I would sometimes find social interaction difficult and draining, being starved of it is definitely having a negative impact on my mental health.”

“Not being able to meet up with friends in person has been somewhat of a blow to mental health”

“Not being able to see my partner has had a significant impact on my mental health.”

“Having no break from my fairly stressful home situation has not been great for my mental health”

“I find being stuck inside with my family is very stressful and it leaves me sometimes feeling unable to work which compounds the already existing stress about work and it often becomes a cycle I find difficult to break”

### *Work adaptation*

“Living and working in the same place is a struggle. I am concerned about this going into another year of school with little opportunity for in person learning or access to on campus study spaces.

I am nervous about completing my final year of my undergraduate degree remotely, as my program is very lab-based.”

“I am finding it hard to keep a balanced perspective on work and assignments working at home by myself and not being around friends.”

“Getting myself into an exam or essay-writing mindset at home is much harder than I thought it would be.”

“I am much less motivated to do my university assignments when I am home compared to when I am at university”

### *Coping skills*

“I have found that with the pandemic and social distancing requirements I have had more difficulty than normal maintaining my mental wellness. I have struggled with some anxiety at several points in the past few months as I haven't have school or work to focus on, and small problems are exacerbated as they are taking up more focus.”

“It's devastating that we won't get a normal orientation week or first year, but I do understand that Queen's is doing everything they can to try and make it better.”

“Severely imparts my ability to spend time outdoors and with my friends, things like rock climbing and hiking and yoga, which are all very important to maintaining my mental health and managing anxiety. It's been a lot harder to deal with in the absence of these things. School was much more stressful online without support of classmates and less connection to professors.”

“It has removed my ability to train for my sport which was a crucial part of my weekly structure 6 days a week, and was critical in my being able to maintain my mental health and work/study productively”

### *Unique populations*

“I have been too scared to see my doctor about my physical digestive health issues and they have gotten much worse. I will likely need a lot of treatment when this is all over. I'm too scared to go to a hospital or doctors office because of the virus at the moment as I live with vulnerable individuals”

“Too afraid to visit hospital for routine problems.”

“I lost my childcare for two children under 3. Completing online synchronous school while my partner works long hours in the emergency department, and having no help from family because of COVID-19 has left me feeling overwhelmed, un-engaged, frustrated, and easily angered. It has impacted my relationship with my partner and to some extent my self worth as I am being forced to be a stay-at-home mother and student and am unsure if I'll be able to work which gives me a lot of fulfillment, and much needed mental stimulation.”

“Trying to juggle dependents alone while in school, as my spouse continues to work”

“Being an international student, I couldn't go back home due to the pandemic. As a result I am all alone. It's lonely and i get restless at times. all this negatively affects by study”

“Not being able to go home as an international student, it was scary to be in this situation in another country”

“Local regulations on flights and exit and entry make international travel difficult, and this also results in the increase in the price of air tickets. An one-way ticket from Canada to China is above 7000 dollars, which is not affordable for me.”

“As an international student, I had trouble coming back home, which caused severe stress and started a period of worse mental health for me.”

# Reporting checklist for cross sectional study.

Based on the STROBE cross sectional guidelines.

|                           |                     | Reporting Item                                                                                                                  | Page Number |
|---------------------------|---------------------|---------------------------------------------------------------------------------------------------------------------------------|-------------|
| <b>Title and abstract</b> |                     |                                                                                                                                 |             |
| Title                     | <a href="#">#1a</a> | Indicate the study's design with a commonly used term in the title or the abstract                                              | 1           |
| Abstract                  | <a href="#">#1b</a> | Provide in the abstract an informative and balanced summary of what was done and what was found                                 | 1           |
| <b>Introduction</b>       |                     |                                                                                                                                 |             |
| Background / rationale    | <a href="#">#2</a>  | Explain the scientific background and rationale for the investigation being reported                                            | 2           |
| Objectives                | <a href="#">#3</a>  | State specific objectives, including any prespecified hypotheses                                                                | 1,2         |
| <b>Methods</b>            |                     |                                                                                                                                 |             |
| Study design              | <a href="#">#4</a>  | Present key elements of study design early in the paper                                                                         | 3           |
| Setting                   | <a href="#">#5</a>  | Describe the setting, locations, and relevant dates, including periods of recruitment, exposure, follow-up, and data collection | 3           |

|    |                      |                      |                                                                 |     |
|----|----------------------|----------------------|-----------------------------------------------------------------|-----|
| 1  | Eligibility criteria | <a href="#">#6a</a>  | Give the eligibility criteria, and the sources and methods of   | 3   |
| 2  |                      |                      | selection of participants.                                      |     |
| 3  |                      |                      |                                                                 |     |
| 4  |                      |                      |                                                                 |     |
| 5  |                      |                      |                                                                 |     |
| 6  |                      | <a href="#">#7</a>   | Clearly define all outcomes, exposures, predictors, potential   | 3   |
| 7  |                      |                      | confounders, and effect modifiers. Give diagnostic criteria, if |     |
| 8  |                      |                      | applicable                                                      |     |
| 9  |                      |                      |                                                                 |     |
| 10 |                      |                      |                                                                 |     |
| 11 |                      |                      |                                                                 |     |
| 12 |                      |                      |                                                                 |     |
| 13 |                      |                      |                                                                 |     |
| 14 | Data sources /       | <a href="#">#8</a>   | For each variable of interest give sources of data and          | 3-4 |
| 15 | measurement          |                      | details of methods of assessment (measurement). Describe        |     |
| 16 |                      |                      | comparability of assessment methods if there is more than       |     |
| 17 |                      |                      | one group. Give information separately for for exposed and      |     |
| 18 |                      |                      | unexposed groups if applicable.                                 |     |
| 19 |                      |                      |                                                                 |     |
| 20 |                      |                      |                                                                 |     |
| 21 |                      |                      |                                                                 |     |
| 22 |                      |                      |                                                                 |     |
| 23 |                      |                      |                                                                 |     |
| 24 |                      |                      |                                                                 |     |
| 25 |                      |                      |                                                                 |     |
| 26 | Bias                 | <a href="#">#9</a>   | Describe any efforts to address potential sources of bias       | 3-4 |
| 27 |                      |                      |                                                                 |     |
| 28 |                      |                      |                                                                 |     |
| 29 | Study size           | <a href="#">#10</a>  | Explain how the study size was arrived at                       | 4   |
| 30 |                      |                      |                                                                 |     |
| 31 |                      |                      |                                                                 |     |
| 32 | Quantitative         | <a href="#">#11</a>  | Explain how quantitative variables were handled in the          | 3-4 |
| 33 | variables            |                      | analyses. If applicable, describe which groupings were          |     |
| 34 |                      |                      | chosen, and why                                                 |     |
| 35 |                      |                      |                                                                 |     |
| 36 |                      |                      |                                                                 |     |
| 37 |                      |                      |                                                                 |     |
| 38 |                      |                      |                                                                 |     |
| 39 |                      |                      |                                                                 |     |
| 40 | Statistical          | <a href="#">#12a</a> | Describe all statistical methods, including those used to       | 3-4 |
| 41 | methods              |                      | control for confounding                                         |     |
| 42 |                      |                      |                                                                 |     |
| 43 |                      |                      |                                                                 |     |
| 44 |                      |                      |                                                                 |     |
| 45 | Statistical          | <a href="#">#12b</a> | Describe any methods used to examine subgroups and              | 3-4 |
| 46 | methods              |                      | interactions                                                    |     |
| 47 |                      |                      |                                                                 |     |
| 48 |                      |                      |                                                                 |     |
| 49 |                      |                      |                                                                 |     |
| 50 |                      |                      |                                                                 |     |
| 51 | Statistical          | <a href="#">#12c</a> | Explain how missing data were addressed                         | 3-4 |
| 52 | methods              |                      |                                                                 |     |
| 53 |                      |                      |                                                                 |     |
| 54 |                      |                      |                                                                 |     |
| 55 |                      |                      |                                                                 |     |
| 56 | Statistical          | <a href="#">#12d</a> | If applicable, describe analytical methods taking account of    | n/a |
| 57 |                      |                      |                                                                 |     |
| 58 |                      |                      |                                                                 |     |
| 59 |                      |                      |                                                                 |     |
| 60 |                      |                      |                                                                 |     |

|    |                  |                                                                                  |  |              |
|----|------------------|----------------------------------------------------------------------------------|--|--------------|
| 1  | methods          | sampling strategy                                                                |  | Not done     |
| 2  |                  |                                                                                  |  |              |
| 3  |                  |                                                                                  |  |              |
| 4  | Statistical      | <a href="#">#12e</a> Describe any sensitivity analyses                           |  | n/a          |
| 5  |                  |                                                                                  |  |              |
| 6  | methods          |                                                                                  |  | Not done     |
| 7  |                  |                                                                                  |  |              |
| 8  |                  |                                                                                  |  |              |
| 9  |                  |                                                                                  |  |              |
| 10 | <b>Results</b>   |                                                                                  |  |              |
| 11 |                  |                                                                                  |  |              |
| 12 |                  |                                                                                  |  |              |
| 13 | Participants     | <a href="#">#13a</a> Report numbers of individuals at each stage of study—eg     |  | 4            |
| 14 |                  | numbers potentially eligible, examined for eligibility,                          |  |              |
| 15 |                  | confirmed eligible, included in the study, completing follow-                    |  |              |
| 16 |                  | up, and analysed. Give information separately for for                            |  |              |
| 17 |                  | exposed and unexposed groups if applicable.                                      |  |              |
| 18 |                  |                                                                                  |  |              |
| 19 |                  |                                                                                  |  |              |
| 20 |                  |                                                                                  |  |              |
| 21 |                  |                                                                                  |  |              |
| 22 |                  |                                                                                  |  |              |
| 23 |                  |                                                                                  |  |              |
| 24 |                  |                                                                                  |  |              |
| 25 |                  |                                                                                  |  |              |
| 26 | Participants     | <a href="#">#13b</a> Give reasons for non-participation at each stage            |  | 4            |
| 27 |                  |                                                                                  |  |              |
| 28 |                  |                                                                                  |  |              |
| 29 | Participants     | <a href="#">#13c</a> Consider use of a flow diagram                              |  | n/a          |
| 30 |                  |                                                                                  |  |              |
| 31 |                  |                                                                                  |  |              |
| 32 |                  |                                                                                  |  | Described in |
| 33 |                  |                                                                                  |  |              |
| 34 |                  |                                                                                  |  | prose        |
| 35 |                  |                                                                                  |  |              |
| 36 |                  |                                                                                  |  |              |
| 37 | Descriptive data | <a href="#">#14a</a> Give characteristics of study participants (eg demographic, |  | 4-5          |
| 38 |                  | clinical, social) and information on exposures and potential                     |  |              |
| 39 |                  | confounders. Give information separately for exposed and                         |  |              |
| 40 |                  | unexposed groups if applicable.                                                  |  |              |
| 41 |                  |                                                                                  |  |              |
| 42 |                  |                                                                                  |  |              |
| 43 |                  |                                                                                  |  |              |
| 44 |                  |                                                                                  |  |              |
| 45 |                  |                                                                                  |  |              |
| 46 |                  |                                                                                  |  |              |
| 47 | Descriptive data | <a href="#">#14b</a> Indicate number of participants with missing data for each  |  | 4            |
| 48 |                  | variable of interest                                                             |  |              |
| 49 |                  |                                                                                  |  |              |
| 50 |                  |                                                                                  |  |              |
| 51 |                  |                                                                                  |  |              |
| 52 | Outcome data     | <a href="#">#15</a> Report numbers of outcome events or summary measures.        |  | 5-8          |
| 53 |                  | Give information separately for exposed and unexposed                            |  |              |
| 54 |                  | groups if applicable.                                                            |  |              |
| 55 |                  |                                                                                  |  |              |
| 56 |                  |                                                                                  |  |              |
| 57 |                  |                                                                                  |  |              |
| 58 |                  |                                                                                  |  |              |
| 59 |                  |                                                                                  |  |              |
| 60 |                  |                                                                                  |  |              |



|    |                          |                      |                                                                   |     |
|----|--------------------------|----------------------|-------------------------------------------------------------------|-----|
| 1  | Main results             | <a href="#">#16a</a> | Give unadjusted estimates and, if applicable, confounder-         | 5-7 |
| 2  |                          |                      |                                                                   |     |
| 3  |                          |                      |                                                                   |     |
| 4  |                          |                      |                                                                   |     |
| 5  |                          |                      |                                                                   |     |
| 6  |                          |                      |                                                                   |     |
| 7  |                          |                      |                                                                   |     |
| 8  |                          |                      |                                                                   |     |
| 9  |                          |                      |                                                                   |     |
| 10 | Main results             | <a href="#">#16b</a> | Report category boundaries when continuous variables              | 3,5 |
| 11 |                          |                      |                                                                   |     |
| 12 |                          |                      |                                                                   |     |
| 13 | Main results             | <a href="#">#16c</a> | If relevant, consider translating estimates of relative risk into | n/a |
| 14 |                          |                      |                                                                   |     |
| 15 |                          |                      |                                                                   |     |
| 16 |                          |                      |                                                                   |     |
| 17 |                          |                      |                                                                   |     |
| 18 | Other analyses           | <a href="#">#17</a>  | Report other analyses done—e.g., analyses of subgroups            | 3-5 |
| 19 |                          |                      |                                                                   |     |
| 20 |                          |                      |                                                                   |     |
| 21 |                          |                      |                                                                   |     |
| 22 |                          |                      |                                                                   |     |
| 23 |                          |                      |                                                                   |     |
| 24 |                          |                      |                                                                   |     |
| 25 |                          |                      |                                                                   |     |
| 26 | <b>Discussion</b>        |                      |                                                                   |     |
| 27 | Key results              | <a href="#">#18</a>  | Summarise key results with reference to study objectives          | 5-8 |
| 28 |                          |                      |                                                                   |     |
| 29 | Limitations              | <a href="#">#19</a>  | Discuss limitations of the study, taking into account sources     | 10  |
| 30 |                          |                      |                                                                   |     |
| 31 |                          |                      |                                                                   |     |
| 32 |                          |                      |                                                                   |     |
| 33 |                          |                      |                                                                   |     |
| 34 | Interpretation           | <a href="#">#20</a>  | Give a cautious overall interpretation considering                | 10  |
| 35 |                          |                      |                                                                   |     |
| 36 |                          |                      |                                                                   |     |
| 37 | Generalisability         | <a href="#">#21</a>  | Discuss the generalisability (external validity) of the study     | 10  |
| 38 |                          |                      |                                                                   |     |
| 39 |                          |                      |                                                                   |     |
| 40 |                          |                      |                                                                   |     |
| 41 |                          |                      |                                                                   |     |
| 42 |                          |                      |                                                                   |     |
| 43 |                          |                      |                                                                   |     |
| 44 |                          |                      |                                                                   |     |
| 45 | <b>Other Information</b> |                      |                                                                   |     |
| 46 |                          |                      |                                                                   |     |
| 47 |                          |                      |                                                                   |     |
| 48 |                          |                      |                                                                   |     |
| 49 |                          |                      |                                                                   |     |
| 50 |                          |                      |                                                                   |     |
| 51 |                          |                      |                                                                   |     |
| 52 |                          |                      |                                                                   |     |
| 53 |                          |                      |                                                                   |     |
| 54 |                          |                      |                                                                   |     |
| 55 |                          |                      |                                                                   |     |
| 56 |                          |                      |                                                                   |     |
| 57 |                          |                      |                                                                   |     |
| 58 |                          |                      |                                                                   |     |
| 59 |                          |                      |                                                                   |     |
| 60 |                          |                      |                                                                   |     |

1 Funding [#22](#) Give the source of funding and the role of the funders for 11  
2  
3  
4 the present study and, if applicable, for the original study on  
5  
6 which the present article is based  
7  
8  
9  
10  
11  
12  
13  
14  
15  
16  
17  
18  
19  
20  
21  
22  
23  
24  
25  
26  
27  
28  
29  
30  
31  
32  
33  
34  
35  
36  
37  
38  
39  
40  
41  
42  
43  
44  
45  
46  
47  
48  
49  
50  
51  
52  
53  
54  
55  
56  
57  
58  
59  
60

For peer review only

# BMJ Open

## Impact of the COVID-19 pandemic on the experience and mental health of university students studying in Canada and the United Kingdom: a cross-sectional study

|                                 |                                                                                                                                                                                                                                                                                                                                                                                                                                                                                                                                                                                                                                                                                                                                                                                             |
|---------------------------------|---------------------------------------------------------------------------------------------------------------------------------------------------------------------------------------------------------------------------------------------------------------------------------------------------------------------------------------------------------------------------------------------------------------------------------------------------------------------------------------------------------------------------------------------------------------------------------------------------------------------------------------------------------------------------------------------------------------------------------------------------------------------------------------------|
| Journal:                        | <i>BMJ Open</i>                                                                                                                                                                                                                                                                                                                                                                                                                                                                                                                                                                                                                                                                                                                                                                             |
| Manuscript ID                   | bmjopen-2021-050187.R2                                                                                                                                                                                                                                                                                                                                                                                                                                                                                                                                                                                                                                                                                                                                                                      |
| Article Type:                   | Original research                                                                                                                                                                                                                                                                                                                                                                                                                                                                                                                                                                                                                                                                                                                                                                           |
| Date Submitted by the Author:   | 05-Nov-2021                                                                                                                                                                                                                                                                                                                                                                                                                                                                                                                                                                                                                                                                                                                                                                                 |
| Complete List of Authors:       | Appleby, Jennifer A; University of Oxford Medical Sciences Division, Oxford Medical School<br>King, Nathan; Queen's University, Department of Public Health Sciences<br>Saunders, Kate E ; University of Oxford, Department of Psychiatry; Warneford Hospital, Oxford Health NHS Foundation Trust<br>Bast, Anne; University of Oxford Medical Sciences Division, Oxford Medical School<br>Rivera, Daniel; University of Toronto, Department of Pharmacology and Toxicology<br>Byun, Jin; Queen's University Faculty of Health Sciences<br>Cunningham, Simone; Queen's University Department of Psychology<br>Khera, Charandeep; University of Oxford, Department of Psychiatry<br>Duffy, Anne; Queen's University, Department of Psychiatry; University of Oxford, Department of Psychiatry |
| <b>Primary Subject Heading</b>: | Mental health                                                                                                                                                                                                                                                                                                                                                                                                                                                                                                                                                                                                                                                                                                                                                                               |
| Secondary Subject Heading:      | Qualitative research                                                                                                                                                                                                                                                                                                                                                                                                                                                                                                                                                                                                                                                                                                                                                                        |
| Keywords:                       | COVID-19, PSYCHIATRY, MENTAL HEALTH                                                                                                                                                                                                                                                                                                                                                                                                                                                                                                                                                                                                                                                                                                                                                         |
|                                 |                                                                                                                                                                                                                                                                                                                                                                                                                                                                                                                                                                                                                                                                                                                                                                                             |

SCHOLARONE™  
Manuscripts



I, the Submitting Author has the right to grant and does grant on behalf of all authors of the Work (as defined in the below author licence), an exclusive licence and/or a non-exclusive licence for contributions from authors who are: i) UK Crown employees; ii) where BMJ has agreed a CC-BY licence shall apply, and/or iii) in accordance with the terms applicable for US Federal Government officers or employees acting as part of their official duties; on a worldwide, perpetual, irrevocable, royalty-free basis to BMJ Publishing Group Ltd ("BMJ") its licensees and where the relevant Journal is co-owned by BMJ to the co-owners of the Journal, to publish the Work in this journal and any other BMJ products and to exploit all rights, as set out in our [licence](#).

The Submitting Author accepts and understands that any supply made under these terms is made by BMJ to the Submitting Author unless you are acting as an employee on behalf of your employer or a postgraduate student of an affiliated institution which is paying any applicable article publishing charge ("APC") for Open Access articles. Where the Submitting Author wishes to make the Work available on an Open Access basis (and intends to pay the relevant APC), the terms of reuse of such Open Access shall be governed by a Creative Commons licence – details of these licences and which [Creative Commons](#) licence will apply to this Work are set out in our licence referred to above.

Other than as permitted in any relevant BMJ Author's Self Archiving Policies, I confirm this Work has not been accepted for publication elsewhere, is not being considered for publication elsewhere and does not duplicate material already published. I confirm all authors consent to publication of this Work and authorise the granting of this licence.

COVID-19 Impact on University Students

# Impact of the COVID-19 pandemic on the experience and mental health of university students studying in Canada and the United Kingdom: a cross-sectional study

Appleby, J.A.<sup>1</sup>, King, N.<sup>2</sup>, Saunders, K.E.A.<sup>3,4</sup>, Bast, A.<sup>1</sup>, Rivera, D.<sup>5</sup>, Byun, J.<sup>6</sup>, Cunningham, S.<sup>7</sup>, Khera, C.K.<sup>3</sup>, and Duffy, A.<sup>3,8\*</sup>

<sup>1</sup>Oxford Medical School, Medical Sciences Division, University of Oxford, Oxford, United Kingdom

<sup>2</sup>Department of Public Health Sciences, Queen's University, Kingston, ON, Canada.

<sup>3</sup>Department of Psychiatry, University of Oxford, Oxford, United Kingdom.

<sup>4</sup>Oxford Health NHS Foundation Trust, Warneford Hospital Oxford OX3 7JX

<sup>5</sup>Department of Pharmacology and Toxicology, University of Toronto, Toronto, ON, Canada;

<sup>6</sup>Faculty of Health Sciences, Queen's University, Kingston, ON, Canada.

<sup>7</sup>Department of Psychology, Queen's University, Kingston, ON, Canada.

<sup>8</sup>Department of Psychiatry, Division of Student Mental Health, Queen's University, Kingston, ON, Canada.

## Correspondence:

Professor Anne Duffy  
anne.duffy@queensu.ca

**Keywords:** COVID-19, psychiatry, public health

Word count: 4000

## COVID-19 Impact on University Students

### Abstract

**Objectives:** To explore the impact of the COVID-19 pandemic on the experiences and mental health of university students.

**Design:** A cross-sectional study consisting of an electronic survey about students' experiences and concerns during the pandemic and the associated impact. In addition to the quantitative analysis, free text responses were extracted and analysed using a framework technique

**Setting:** Queen's university in Canada and the University of Oxford in the UK

**Participants:** Undergraduate students at Queen's university and first year undergraduate students at the University of Oxford were invited to complete the COVID supplement survey. This study included data from 3013 Queen's students as the primary focus and 339 Oxford students as a secondary comparison.

**Results:** Females at Queen's reported greater adherence to government recommendations to prevent the spread of COVID-19 (91.3% vs 86.7%,  $\chi^2 p < .01$ ) and were more likely to self-isolate (63.9% vs 57.0%,  $\chi^2 p < .01$ ) than males. A similar trend was seen among Oxford students. Students' concerns were wide-ranging including those related to their learning experience, finances, and future academic and career prospects. 78.9% of Queen's students and 50.4% of first-year Oxford students reported worries about the long-term impact on their academic and job prospects. A sizeable proportion of students also reported that the pandemic negatively impacted their plans to continue at university (29.4% of Queen's, 14.2% of Oxford), and disrupted activities important to their mental well-being. Key themes identified in the qualitative component included the negative impacts of social isolation, challenging academic changes, and disruption to support services and means of coping.

**Conclusions:** Overall, findings underscore the importance of addressing areas of student concern and the aspects of student life negatively impacted by the pandemic in order to maintain student well-being and support a successful university experience.

### Article Summary: Strengths and limitations of this study

- The first study to compare the impact of the COVID-19 pandemic on university students across different countries.
- Responses were obtained from large, diverse samples of university students.
- Validated measures were used to assess the impact of the pandemic on students.
- A low response rate was obtained from the Queen's University sample.
- Participants were surveyed early in the pandemic, and the impact on students may change over time.

## 1 Introduction

## COVID-19 Impact on University Students

In late 2019, the novel Coronavirus (COVID-19) was detected in Wuhan, China, causing disease ranging from asymptomatic infection to life-threatening respiratory compromise.[1] The restrictions imposed to limit viral transmission and the direct impact of the virus profoundly affected daily life and well-being, with heightened anxiety and reduced access to usual coping mechanisms including exercise, socialisation, and leisure activities.[2]

University students have been particularly affected by COVID-19. Remote teaching and social distancing measures implemented across institutions worldwide have dramatically changed campus life.[3] In addition to the changes experienced by the general population, students have experienced disruption to their learning, assessment and schedules, and the cancellation of enriched learning opportunities including field trips, laboratory courses, and learning exchanges. Additionally, the pandemic may affect future educational opportunities, job prospects, and financial stability.

The pandemic and its aftermath will likely have lasting effects on students and universities. Therefore, there is a need for the collection of reliable data to assess the impact of the pandemic on student well-being and academic outcomes. This would improve our understanding of student experiences and concerns, informing institutions' approaches to addressing these.

In this study, we aimed to explore university student experiences during the COVID-19 pandemic, including concerns related to the pandemic and the associated impact on education, daily life, career prospects, and mental health support. We leveraged an ongoing longitudinal survey study of undergraduate students attending Queen's University in Canada and the University of Oxford in the UK.[4-5]

## 2 Methods

COVID-specific measures were added to the ongoing U-Flourish Student Well-Being and Academic Success survey,[6] which invites first-year university students at Queen's (Canada) and Oxford (UK) to complete electronic surveys at the beginning and end of each academic year. The surveys ask about risk and protective factors for well-being and mental health using validated measures. COVID-related questions were added to the U-Flourish follow-up survey for participating first-year Oxford students (May 2020) and sent out as a supplementary survey to all registered Queen's undergraduate students (July 2020).

### 2.1 Study Variables

#### 2.1.1 Demographic Characteristics.

Age in years and gender were self-reported and international student status, and program and year of study were obtained from university administrative data.

#### 2.1.2 COVID-19 related measures.

Queen's participants were asked to describe their approach to self-isolation during the pandemic by selecting all options that applied from a list of nine options, grouped into: (1) No change (i.e., "I have lived my life as normal"), (2) Minor change, but not self-isolation (e.g., social distancing, working from home), and (3) Self-isolation (i.e., staying at home and avoiding contact with people outside of your household). Participants rated their knowledge level on COVID-19 from "1 – Very Poor" to "7 – Very Good", and whether they have been following government recommendations from "1 – Not at all" to "7 – Very much so".

## COVID-19 Impact on University Students

At both Queen's and Oxford, anxiety surrounding the pandemic was assessed using the COVID-19 Pandemic Anxiety Scale.[7] A series of nine statements asked, how serious an issue do you think COVID-19 is, and how worried are you about the following: catching COVID-19, friends and family catching COVID-19, leaving the house, infecting others, having enough food and other essential items, missing university, and the impact on your finances and long-term academic and job prospects. Each statement was rated on a five-point scale according to level of agreement, re-categorised into 'Disagree' (1-2), 'Neither disagree or agree' (3), and 'Agree' (4-5).

Students were also asked about the impact of the pandemic on studies and learning opportunities, future academic/professional prospects, lifestyle, relationships and connectedness, and for those in need, access to mental health support. Participants rated the impact of the pandemic and associated social distancing on a five-point scale from 1=Very negative to 5=Very positive (categorised into 'Negative', 'Neither', or 'Positive'). On the Oxford survey, 7 of the 13 impact items were included. Participants were asked if any mental health support they receive had been stopped, postponed or negatively affected due to the pandemic.

Finally, participants were asked "Are there any other significant impacts related to the COVID-19 pandemic on your mental health, wellbeing, or education that you would like to comment on?"

### 2.2 Statistical Analysis

The primary analysis utilised data from the Queen's COVID-19 survey. Responses to the Pandemic Anxiety Scale and questions assessing the impact of the pandemic and associated social distancing were examined in the Oxford sample in an exploratory manner to compare between institutions and countries. Samples were restricted to participants with complete data on the variables of interest. Analyses were conducted using RStudio.[8] Descriptive statistics were used to describe the sample, and responses to the Pandemic Anxiety Scale and COVID-19 impact items overall and by gender, age group and year of study. The Oxford sample only included first-year students of similar ages, so analyses were limited to examining differences by gender. Students identifying as other than 'male' or 'female' were not included in the gender-stratified analyses because of small numbers (n=34/3013 in the Queen's sample). Differences in proportions between strata were examined using chi-square tests.

Qualitative data from the Queen's and Oxford surveys were extracted from free text responses. Qualitative analysis used a framework technique.[9-10] Participant data were interpreted and summarized. Coding comprised identification of experiences, referred to as 'themes'. As understanding increased, data were summarised and re-interpreted, new codes generated, redundant codes deleted and overlapping codes merged. Through this process a stable framework emerged that appeared increasingly likely to describe participant experience. The study team met regularly to discuss the findings and refine the emerging framework. To reduce researcher bias, the team analysing the qualitative data were not made aware of the quantitative findings until the framework had been agreed.

The STROBE cross-sectional reporting guidelines were used in the reporting of this study.[11]

### 2.3 Patient and public involvement



## COVID-19 Impact on University Students

The ongoing UFlourish survey is a student-informed research effort.[6] Peer health educators (PHEs) are included at all stages of the research from design to implementation and we will include the student perspective in the interpretation and dissemination of findings.

### 3 Results

#### 3.1 Description of the sample

The response rate among Queen's undergraduate students was 13.5% (n=3,452). The sample was broadly representative of the eligible student population by year and program of study, full versus part-time, and international versus domestic status. However, more students in the sample identified as female (70.1% vs. 57.7%,  $\chi^2 p < .01$ ) and were younger than 19 years old (40.6% vs 35.0%,  $\chi^2 p < .01$ ). In this report, we describe the responses of 3,013 students with complete data on the variables of interest (Table 1). Students with missing data (n=439) were similar in age (Mean(SD)= 19.6(3.1) vs 19.8(2.9), t-test p=0.34), but more likely to identify as male (38.5% vs 28.8%,  $\chi^2 p < .001$ ) and be international students (21.7% vs 7.5%, p<.001). The average age of the study sample was 19.6 (SD=2.8), and most students were domestic (92.5%). Students were most likely to be preparing to begin first year (25.4%) or finishing first year (23.9%), and the most common programs of study were Arts, Humanities, and Social Sciences (33.8%), Life and Physical Sciences (27.4%), and Engineering and Applied Science (20.2%).

The response rate among the first-year Oxford student cohort was 45.0% (n=356). The sample also had a higher proportion of females (62.1% vs 54.3%) than the university database. Participants' courses included: Humanities (34.6%), Mathematical, Physical and Life Sciences (32.0%), Medical Sciences (19.9%), Social Sciences (13.6%), and unknown (13.6%). Here we describe the responses of 339 students with complete data on the Pandemic Anxiety Scale and the impact of COVID-19 items. The average age of respondents was 18.4 years old, and the majority identified as female (61.7%). In comparison, Queen's first-year students were an average age of 18.6 (SD=2.4) years and 72.1% identified as female.

## COVID-19 Impact on University Students

**Table 1.** Description of the Queen's (Canadian) summer 2020 survey sample, including student levels of knowledge on COVID-19, following of recommendations, and approaches to self-isolation

|                                    | n    | (%)    |
|------------------------------------|------|--------|
| Age                                |      |        |
| ≤18                                | 1222 | (40.6) |
| 19-20                              | 1062 | (35.3) |
| ≥21                                | 729  | (24.2) |
| Gender                             |      |        |
| Female                             | 2111 | (70.1) |
| Male                               | 868  | (28.8) |
| Other                              | 34   | (1.13) |
| Program of Study                   |      |        |
| Arts, Humanities & Social Sciences | 1019 | (33.8) |
| Life and Physical Sciences         | 824  | (27.4) |
| Engineering and Applied Science    | 607  | (20.2) |
| Business                           | 166  | (5.5)  |
| Computing                          | 93   | (3.1)  |
| Nursing                            | 92   | (3.1)  |
| Health Sciences                    | 64   | (2.1)  |
| Law                                | 74   | (2.5)  |
| Medicine                           | 74   | (2.5)  |
| Year of Study                      |      |        |
| Incoming                           | 765  | (25.4) |
| First                              | 721  | (23.9) |
| Second                             | 517  | (17.2) |
| Third                              | 536  | (17.8) |
| Fourth                             | 369  | (12.3) |
| Fifth or Sixth                     | 105  | (3.5)  |
| International/Domestic Status      |      |        |
| Domestic                           | 2788 | (92.5) |
| International                      | 225  | (7.5)  |
| Knowledge level on COVID-19        |      |        |
| 1 (Very poor) to 3                 | 209  | (6.9)  |
| 4                                  | 664  | (22.0) |
| 5 to 7 (Very good)                 | 2140 | (71.0) |
| Following COVID-19 recommendations |      |        |
| 1 (Not at all) to 3                | 91   | (3.0)  |
| 4                                  | 203  | (6.7)  |
| 5 to 7 (Very much so)              | 2719 | (90.2) |
| Approach to self-isolation         |      |        |
| No change/ life as usual           | 125  | (4.0)  |
| Minor change but not isolation     | 1075 | (34.2) |
| Self-isolation                     | 1946 | (61.9) |

## COVID-19 Impact on University Students

**3.2 Knowledge about COVID-19 and associated experiences**

Overall, Queen's students rated their knowledge of COVID-19 as good to very good (71%  $\geq 5$  out of 7). Most reported following government recommendations (90%  $\geq 5$  out of 7). Female students were more likely than males to report following recommendations (91.3% vs 86.7%,  $\chi^2 p < .01$ ). Knowledge and following of recommendations were lowest in students aged 18 and younger (68.0% and 87.3%  $\geq 5$ ) and highest in students aged 21 and older (79.0% and 93.3%). Most students (61.9%) reported self-isolating, defined as "staying at home and avoiding contact with people outside of your household" (Table 1). A minority reported continuing as normal ( $n = 125$  (4.0%)). Females were more likely to report self-isolating (63.9% vs 57.0%,  $\chi^2 p < .01$ ), and males were more likely to report no change in behaviour (8.0% vs 2.3%,  $\chi^2 p < .01$ ). There was no significant difference in self-isolation practices by age.

**3.3 COVID-19 related worries**

Responses to the Pandemic Anxiety Scale (Figure 1) showed that almost all Queen's students agreed that COVID-19 is a serious issue (93.7%). Although many students reported concerns about catching COVID-19 (48.1%), a greater proportion were worried about infecting others (64.0%), or friends and family catching it (74.9%). Few students reported being afraid to leave the house (14.7%), and most were not worried about access to food and essential items (87.6%). Worries about catching and transmitting COVID-19 were greatest in females, older students, and upper years of study (Table 2). These overall trends and differences between genders were consistent with responses from Oxford students (Figure 2; Supplemental Table 1).

Most Queen's students reported concerns about missing university (67.8%), with younger students most worried (age 18 or younger = 80.4%, age 19-20 = 72.1%, and age 21 or older = 47.7%;  $\chi^2 p < .01$ ). Many students reported worries about their finances (58.4%), and long-term academic and job prospects (78.9%). Male and incoming students were less worried about the impact on finances and long-term prospects than female and current students (Table 2). Oxford student responses to the Pandemic Anxiety Scale were largely consistent with Queen's student responses, but a smaller percentage of Oxford students reported concerns about finances (26.5%) and long-term academic and job prospects (50.4%, Figure 2). Consistent with Queen's, females at Oxford were more worried about their finances and long-term prospects (Supplemental Table 1).

[INSERT FIGURE 1 HERE]

[INSERT FIGURE 2 HERE]

## COVID-19 Impact on University Students

**Table 2.** Queen's University percentage ratings on the COVID-19 Pandemic Anxiety Scale items by gender, age group, and year of study

|                                                                                         | Gender |        |      | Age Group |       |      |      | Year of Study |                                  |                  |      |
|-----------------------------------------------------------------------------------------|--------|--------|------|-----------|-------|------|------|---------------|----------------------------------|------------------|------|
|                                                                                         | Male   | Female | p*   | ≤18       | 19-20 | ≥21  | p*   | Incoming      | 1 <sup>st</sup> /2 <sup>nd</sup> | ≥3 <sup>rd</sup> | p*   |
| Think COVID-19 is a very serious issue                                                  |        |        |      |           |       |      |      |               |                                  |                  |      |
| Agree                                                                                   | 90.5   | 94.9   | <.01 | 91.6      | 94.8  | 95.5 | <.01 | 91.8          | 92.8                             | 96.1             | <.01 |
| Neutral                                                                                 | 4.3    | 2.8    |      | 4.4       | 2.5   | 2.2  |      | 4.7           | 3.5                              | 1.8              |      |
| Disagree                                                                                | 5.2    | 2.3    |      | 4.0       | 2.6   | 2.3  |      | 3.5           | 3.7                              | 2.1              |      |
| Worried that I will catch COVID-19                                                      |        |        |      |           |       |      |      |               |                                  |                  |      |
| Agree                                                                                   | 38.2   | 52.1   | <.01 | 43.6      | 50.7  | 51.7 | <.01 | 38.4          | 49.6                             | 53.5             | <.01 |
| Neutral                                                                                 | 28.1   | 25.6   |      | 28.7      | 23.5  | 26.2 |      | 32.2          | 24.9                             | 23.5             |      |
| Disagree                                                                                | 33.8   | 22.3   |      | 27.7      | 25.9  | 22.1 |      | 29.4          | 25.5                             | 23.1             |      |
| Worried friends and family will catch COVID-19                                          |        |        |      |           |       |      |      |               |                                  |                  |      |
| Agree                                                                                   | 67.5   | 78.1   | <.01 | 68.4      | 78.4  | 80.8 | <.01 | 65.1          | 75.3                             | 82.0             | <.01 |
| Neutral                                                                                 | 16.0   | 13.2   |      | 17.0      | 12.0  | 12.2 |      | 19.2          | 14.1                             | 10.1             |      |
| Disagree                                                                                | 16.5   | 8.7    |      | 14.6      | 9.6   | 7.0  |      | 15.7          | 10.6                             | 7.9              |      |
| I am afraid to leave the house right now                                                |        |        |      |           |       |      |      |               |                                  |                  |      |
| Agree                                                                                   | 9.3    | 16.6   | <.01 | 12.2      | 16.4  | 16.3 | 0.01 | 9.4           | 16.0                             | 17.0             | <.01 |
| Neutral                                                                                 | 15.1   | 19.4   |      | 17.4      | 17.8  | 19.5 |      | 16.6          | 18.6                             | 18.4             |      |
| Disagree                                                                                | 75.6   | 64.0   |      | 70.5      | 65.8  | 64.2 |      | 74.0          | 65.4                             | 64.6             |      |
| I am worried that I might transmit the infection to someone else                        |        |        |      |           |       |      |      |               |                                  |                  |      |
| Agree                                                                                   | 54.2   | 67.7   | <.01 | 58.4      | 66.6  | 69.4 | <.01 | 51.2          | 66.6                             | 70.4             | <.01 |
| Neutral                                                                                 | 18.8   | 16.2   |      | 18.6      | 16.0  | 15.2 |      | 22.1          | 14.9                             | 15.3             |      |
| Disagree                                                                                | 27.0   | 16.0   |      | 23.0      | 17.4  | 15.4 |      | 26.7          | 18.5                             | 14.4             |      |
| I am worried I will not have enough food and other essential items during the outbreak  |        |        |      |           |       |      |      |               |                                  |                  |      |
| Agree                                                                                   | 4.6    | 4.6    | 0.12 | 4.0       | 4.0   | 6.9  | 0.02 | 3.5           | 5.0                              | 5.2              | 0.37 |
| Neutral                                                                                 | 6.1    | 8.4    |      | 7.1       | 8.1   | 8.2  |      | 6.9           | 8.2                              | 7.8              |      |
| Disagree                                                                                | 89.2   | 87.0   |      | 88.9      | 88.0  | 84.9 |      | 89.5          | 86.8                             | 87.0             |      |
| I am worried about missing university                                                   |        |        |      |           |       |      |      |               |                                  |                  |      |
| Agree                                                                                   | 63.8   | 69.5   | <.01 | 79.7      | 71.2  | 43.1 | <.01 | 79.9          | 73.4                             | 51.9             | <.01 |
| Neutral                                                                                 | 12.6   | 12.6   |      | 9.7       | 11.5  | 19.2 |      | 9.7           | 11.2                             | 16.5             |      |
| Disagree                                                                                | 23.5   | 17.9   |      | 10.6      | 17.3  | 37.7 |      | 10.5          | 15.4                             | 31.6             |      |
| I am worried about the impact on my finances                                            |        |        |      |           |       |      |      |               |                                  |                  |      |
| Agree                                                                                   | 50.0   | 61.6   | <.01 | 53.8      | 61.8  | 61.5 | <.01 | 47.1          | 63.2                             | 61.3             | <.01 |
| Neutral                                                                                 | 18.8   | 15.8   |      | 19.7      | 14.7  | 14.0 |      | 22.5          | 14.9                             | 14.1             |      |
| Disagree                                                                                | 31.2   | 22.6   |      | 26.5      | 23.5  | 24.6 |      | 30.5          | 21.9                             | 24.7             |      |
| I am worried about the long-term impact this will have on my academic and job prospects |        |        |      |           |       |      |      |               |                                  |                  |      |
| Agree                                                                                   | 72.7   | 81.4   | <.01 | 77.7      | 80.8  | 78.1 | 0.09 | 74.8          | 80.3                             | 80.3             | <.01 |
| Neutral                                                                                 | 10.1   | 8.9    |      | 10.9      | 7.9   | 8.8  |      | 12.0          | 9.4                              | 7.2              |      |
| Disagree                                                                                | 17.2   | 9.7    |      | 11.4      | 11.3  | 13.2 |      | 13.2          | 10.3                             | 12.5             |      |

Notes: (1) \*p-value for chi-square test, (2) sample sizes by strata are: 868 males and 2,111 females; 1,222 ≤18, 1,062 ages 19-20, and 729 ≥21; 765 Incoming, 1,238 1<sup>st</sup>/2<sup>nd</sup> year, and 1,010 ≥3<sup>rd</sup> year.

## COVID-19 Impact on University Students

### 3.4 Impact of COVID-19

#### 3.4.1 Effects on university and studies

Queen's students commonly reported that the pandemic had negatively impacted their studies (69.9%) (Figure 1). While most students reported neither a positive nor negative impact on their plans to continue at university (61.5%), a notable proportion reported a negative impact (29.4%). Incoming students were more likely to report a negative impact than current students (Table 3) Both positive (22.8%) and negative (27.8%) impact on grades was reported. Most students perceived online learning negatively (61.2%), and reported a negative impact on their prospects for internships, exchanges, and other enriched learning experiences (68.0%). These findings were largely consistent with Oxford students' responses. However, a smaller proportion of Oxford students reported a negative impact on plans to continue at university (14.2%), and negative perceptions of online learning (30.4%; Figure 2; Supplemental Table 2).

#### 3.4.2 Employment and finances

Most students at Queen's (69.3%) and Oxford (72.6%) reported a negative impact on their prospects for summer employment. A greater proportion of females than males reported a negative impact at Queen's (71.4% vs 65.3%,  $p < 0.01$ ) and Oxford (77.5% vs 63.6%,  $\chi^2 p = 0.02$ ) (Table 3, Supplemental Table 2). A third of Queen's students reported a negative impact on their prospects to achieve their career aspirations (37.8%). Students in later years of study reported a more negative impact on their career aspirations ( $\chi^2 p < 0.05$ ). Most students reported a negative impact on their finances (51.8%), and few reported a negative impact on their ability to access food and essentials (10.7%). The perceived negative impact on employment prospects and finances was greatest in females, older students, and students in upper years of study (Table 3).

#### 3.4.3 Exercise, leisure and social life

Queen's students reported both a negative (42.9%) and positive (30.3%) impact on ability to exercise, but most reported a negative impact on hobbies and leisure activities (56.4%). These findings were consistent with Oxford students (Figure 2). Most students reported a negative impact on their social life (74.0%). While many students reported neither a positive nor negative impact on relationships with family members (41.6%), several reported a negative impact (24.9%). A negative impact on family relationships was more commonly reported by females (Table 3)

## COVID-19 Impact on University Students

**Table 3.** Queen's University percentage reporting by gender, age group and year of study. *Could you describe the impact that the COVID-19 pandemic and associated social distancing have had on:*

|                                                                    | Gender |        |      | Age Group |       |      |      | Year of Study |                                  |                  |      |
|--------------------------------------------------------------------|--------|--------|------|-----------|-------|------|------|---------------|----------------------------------|------------------|------|
|                                                                    | Male   | Female | p*   | ≤18       | 19-20 | ≥21  | p*   | Incoming      | 1 <sup>st</sup> /2 <sup>nd</sup> | ≥3 <sup>rd</sup> | p*   |
| Your university studies?                                           |        |        |      |           |       |      |      |               |                                  |                  |      |
| Negative                                                           | 65.2   | 71.8   | <.01 | 67.2      | 73.7  | 68.7 | <.01 | 60.1          | 74.7                             | 71.3             | <.01 |
| Neutral                                                            | 28.3   | 22.9   |      | 28.3      | 20.5  | 23.7 |      | 34.8          | 20.0                             | 22.2             |      |
| Positive                                                           | 6.5    | 5.3    |      | 4.5       | 5.7   | 7.5  |      | 5.1           | 5.3                              | 6.5              |      |
| Your plans to continue at university?                              |        |        |      |           |       |      |      |               |                                  |                  |      |
| Negative                                                           | 28.5   | 29.4   | 0.14 | 31.4      | 31.5  | 23.2 | <.01 | 33.1          | 28.6                             | 27.7             | <.01 |
| Neutral                                                            | 60.8   | 62.2   |      | 58.2      | 60.2  | 69.1 |      | 54.8          | 62.7                             | 65.2             |      |
| Positive                                                           | 10.7   | 8.4    |      | 10.4      | 8.4   | 7.7  |      | 12.2          | 8.7                              | 7.0              |      |
| Your perception of online/remote learning?                         |        |        |      |           |       |      |      |               |                                  |                  |      |
| Negative                                                           | 61.1   | 61.3   | 0.37 | 62.8      | 64.0  | 54.5 | <.01 | 61.0          | 61.4                             | 61.1             | 0.99 |
| Neutral                                                            | 23.1   | 24.7   |      | 22.1      | 23.8  | 27.9 |      | 24.1          | 23.8                             | 24.5             |      |
| Positive                                                           | 15.8   | 14.0   |      | 15.1      | 12.2  | 17.7 |      | 14.9          | 14.8                             | 14.5             |      |
| Your academic grades?                                              |        |        |      |           |       |      |      |               |                                  |                  |      |
| Negative                                                           | 29.0   | 27.2   | 0.23 | 27.3      | 30.7  | 24.3 | <.01 | 21.7          | 32.1                             | 27.0             | <.01 |
| Neutral                                                            | 46.9   | 50.3   |      | 46.9      | 47.7  | 56.0 |      | 50.6          | 46.4                             | 52.1             |      |
| Positive                                                           | 24.1   | 22.5   |      | 25.8      | 21.6  | 19.8 |      | 27.7          | 21.4                             | 20.9             |      |
| Your prospects for summer internships/exchanges/academic pursuits? |        |        |      |           |       |      |      |               |                                  |                  |      |
| Negative                                                           | 63.9   | 69.8   | 0.01 | 64.3      | 73.9  | 65.6 | <.01 | 56.7          | 74.3                             | 68.8             | <.01 |
| Neutral                                                            | 32.0   | 26.8   |      | 31.8      | 21.8  | 31.7 |      | 38.8          | 22.0                             | 27.9             |      |
| Positive                                                           | 4.1    | 3.5    |      | 3.9       | 4.3   | 2.7  |      | 4.4           | 3.7                              | 3.3              |      |
| Your prospects for summer employment?                              |        |        |      |           |       |      |      |               |                                  |                  |      |
| Negative                                                           | 65.3   | 71.4   | <.01 | 68.5      | 71.4  | 67.6 | <.01 | 62.2          | 73.7                             | 69.3             | <.01 |
| Neutral                                                            | 27.2   | 23.0   |      | 23.7      | 22.3  | 28.5 |      | 28.8          | 20.6                             | 25.6             |      |
| Positive                                                           | 7.5    | 5.7    |      | 7.9       | 6.3   | 3.8  |      | 9.0           | 5.7                              | 5.0              |      |
| Your prospects to realize your career aspirations?                 |        |        |      |           |       |      |      |               |                                  |                  |      |
| Negative                                                           | 33.8   | 39.4   | 0.01 | 29.4      | 42.0  | 45.8 | <.01 | 25.4          | 38.7                             | 46.1             | <.01 |
| Neutral                                                            | 57.8   | 53.9   |      | 62.4      | 50.4  | 48.6 |      | 65.9          | 54.3                             | 47.1             |      |
| Positive                                                           | 8.5    | 6.8    |      | 8.2       | 7.6   | 5.6  |      | 8.8           | 7.0                              | 6.7              |      |
| Your finances?                                                     |        |        |      |           |       |      |      |               |                                  |                  |      |
| Negative                                                           | 46.4   | 54.1   | <.01 | 46.0      | 55.7  | 56.0 | <.01 | 40.3          | 56.5                             | 54.9             | <.01 |
| Neutral                                                            | 41.7   | 36.5   |      | 43.0      | 35.1  | 33.7 |      | 47.2          | 35.1                             | 34.7             |      |
| Positive                                                           | 11.9   | 9.3    |      | 11.0      | 9.2   | 10.3 |      | 12.5          | 8.5                              | 10.5             |      |
| Your ability to access enough food or other essential items?       |        |        |      |           |       |      |      |               |                                  |                  |      |
| Negative                                                           | 10.2   | 10.9   | 0.86 | 8.3       | 12.2  | 12.6 | <.01 | 9.0           | 10.3                             | 12.4             | 0.02 |
| Neutral                                                            | 81.0   | 80.6   |      | 82.3      | 78.4  | 81.5 |      | 80.0          | 81.8                             | 80.0             |      |
| Positive                                                           | 8.8    | 8.6    |      | 9.4       | 9.4   | 5.9  |      | 11.0          | 7.8                              | 7.6              |      |
| Your ability to exercise?                                          |        |        |      |           |       |      |      |               |                                  |                  |      |
| Negative                                                           | 46.6   | 41.1   | <.01 | 40.4      | 42.7  | 47.5 | 0.01 | 40.4          | 42.0                             | 45.9             | 0.02 |
| Neutral                                                            | 27.5   | 26.5   |      | 26.2      | 28.8  | 25.0 |      | 25.9          | 28.9                             | 25.0             |      |
| Positive                                                           | 25.9   | 32.4   |      | 33.4      | 28.5  | 27.6 |      | 33.7          | 29.1                             | 29.1             |      |
| Your ability to participate in hobbies/leisure activities?         |        |        |      |           |       |      |      |               |                                  |                  |      |
| Negative                                                           | 57.1   | 56.3   | <.01 | 54.1      | 58.2  | 57.8 | 0.02 | 55.7          | 56.1                             | 57.3             | 0.96 |
| Neutral                                                            | 20.5   | 14.7   |      | 15.7      | 17.6  | 15.5 |      | 16.3          | 16.6                             | 16.0             |      |
| Positive                                                           | 22.4   | 29.1   |      | 30.2      | 24.2  | 26.8 |      | 28.0          | 27.3                             | 26.6             |      |
| Your ability to connect with your friends and your social life?    |        |        |      |           |       |      |      |               |                                  |                  |      |
| Negative                                                           | 72.7   | 74.6   | 0.56 | 70.8      | 77.2  | 74.9 | <.01 | 68.8          | 75.7                             | 76.0             | <.01 |
| Neutral                                                            | 16.8   | 15.5   |      | 16.2      | 14.8  | 17.2 |      | 17.9          | 14.5                             | 16.2             |      |
| Positive                                                           | 10.4   | 9.9    |      | 13.0      | 8.0   | 8.0  |      | 13.3          | 9.9                              | 7.7              |      |
| Your relationships with your family members?                       |        |        |      |           |       |      |      |               |                                  |                  |      |
| Negative                                                           | 20.2   | 26.6   | <.01 | 24.6      | 24.4  | 26.1 | 0.44 | 23.1          | 26.4                             | 24.4             | 0.22 |
| Neutral                                                            | 48.3   | 39.0   |      | 40.1      | 42.8  | 42.4 |      | 43.0          | 39.3                             | 43.4             |      |

## COVID-19 Impact on University Students

|          |      |      |      |      |      |      |      |      |
|----------|------|------|------|------|------|------|------|------|
| Positive | 31.6 | 34.4 | 35.3 | 32.9 | 31.6 | 33.9 | 34.3 | 32.3 |
|----------|------|------|------|------|------|------|------|------|

Notes: (1) \*p-value for chi-square test, (2) sample size by strata: 868 males and 2,111 females; 1,222  $\leq$ 18, 1,062 ages 19-20, and 729  $\geq$ 21); 765 Incoming, 1,238 1<sup>st</sup>/2<sup>nd</sup> year, and 1,010  $\geq$ 3<sup>rd</sup> year.

### 3.4.4 Receipt of Mental Health Support

Among Queen's students receiving mental health support (n=1,256), most reported this was unaffected by COVID-19 (66.9%). However, significantly more females reported their support being negatively affected than males (37.4% of females, 18.2% of males,  $\chi^2$  p<0.005). There was no significant difference in the proportions of students reporting a negative impact according to age or year of study.

### 3.5 Common Pandemic Impact Themes – Qualitative analysis

Free text responses to an open-ended question asking students to describe other impacts related to COVID-19 were analysed for major themes. Of these responses (Queen's n=815, Oxford n=60), the proportion pertaining to each theme is described below. See Supplemental Materials Appendix A1 for representative quotes.

#### 3.5.1 Negative impact due to social isolation

Many students (56.0% Queen's, 33.3% Oxford) described feelings of anxiety, loneliness, and restlessness associated with social isolation due to loss of in-person contact with peers, friends, and significant others. Many students described friends as key supports, and that reduced contact worsened their well-being: "Forced separation from part of my support system has had a negative impact on both my academics and mental health". Students reported that isolation with roommates or family members, with whom they had already-strained relationships, increased stress and caused feelings of being trapped in a negative environment which worsened mental health: "Having no break from my fairly stressful home situation has not been great for my mental health". Overall, reduced interaction with support networks and forced confinement increased stress.

#### 3.5.2 Challenging academic and institutional changes

Students described challenges adapting to new learning methods (32.1% of Queen's students, 23.3% of Oxford students). Online learning was reported as difficult or less effective than in-person instruction due to lack of quiet study spaces, blurred school and home boundaries, and distance from peers: "Getting myself into an exam or essay-writing mindset at home is much harder than I thought it would be". Students reported difficulty coping with high work demands outside their usual surroundings, isolated from peers during a stressful time: "I am finding it hard to keep a balanced perspective on work and assignments working at home by myself and not being around friends". Concerns about learning experiences and future preparedness stemmed from loss of practical course components, cancellation of professional placements, and reduced access to specialized facilities. The cancellation of key milestones contributed to worries about personal development and the quality of students' social experience at university. Responses concerning institutional pandemic responses were mixed, including understanding given the circumstances, and frustration with decisions regarding tuition, campus closure, and a perceived lack of support.

## COVID-19 Impact on University Students

### 3.5.3 Financial Challenges

Some Queen's students (11.4%), but no Oxford students, expressed specific financial concerns. These included frustration and anxiety regarding reduced income due to fewer career opportunities and employment termination, and expenses due to student housing and university tuition fees. Reduced income combined with maintained expenses amplified financial stress.

### 3.5.4 Disruptions to support services and means of coping

A small proportion of students (5.6% Queen's, 5.0% Oxford) described disrupted access to health and support services, including difficulties accessing medication and obtaining healthcare appointments and in-person counselling. Fear of accessing services in-person due to risk of COVID-19 exposure was reported as impeding usual care: "Too afraid to visit hospital for routine problems". Students described reluctance to use online services, outlining difficulties adapting to or navigating them. Reduced engagement in leisure or physical group activities usually key to managing stress and protective for mental health was reported as negatively impacting the ability to cope: "It has removed my ability to train for my sport which was a crucial part of my weekly structure 6 days a week, and was critical in my being able to maintain my mental health and work/study productively".

## 4 Discussion

The COVID-19 pandemic has caused major disruption to university and has had far-reaching impacts on students' daily lives, well-being and perception of their future. Our study explored undergraduate student experiences and worries in the early part of the pandemic, and the associated impact on their education, daily life, career prospects and mental health support. To our knowledge, this is the first study to compare the impact of the pandemic on university students across different countries. We hope that this information can be used to support students during and beyond the pandemic.

Nearly all students across both universities agreed that COVID-19 is a serious issue, but females were more likely than males to report following government recommendations and adapting their lifestyle. This may be partly due to increased anxiety among female students. Screening positive for anxiety and depression has been found to be higher in female university students and females of similar age in the general population when compared to males.[4,5,12] Moreover, females appear more susceptible to anxiety and depression surrounding COVID-19,[13-15] and are more likely to follow COVID-19-related public health guidelines.[16] In our study a greater proportion of females reported worries and concerns around the pandemic than males according to the Pandemic Anxiety Scale.

Younger students were significantly more likely to report concerns about missing university than older students, who were more likely to be worried about the impact on their career prospects. This may reflect different priorities: missing university is a more immediate concern for younger students who are years away from graduating. In contrast, older students may be more concerned about applying for jobs at a time where workers are being furloughed or made redundant, and employment rates are falling.[17-18] This is supported by consistent concern about long-term academic and job prospects across age groups, and our qualitative analysis. Queen's, but not Oxford students discussed concerns surrounding employment, which may reflect the older students in the Queen's sample. Overall, students at different stages of study require targeted approaches to address immediate concerns regarding future academic or career prospects.



## COVID-19 Impact on University Students

1  
2  
3 While students expressed worries about catching COVID-19, many more were worried about  
4 infecting others, or friends and family contracting it. Most students are relatively young with  
5 few co-morbidities and therefore at low-risk for severe COVID-19 disease but may have  
6 family members at higher risk due to their age and co-morbidities.[19] This is important for  
7 decisions regarding bringing students to campus, as students may worry about returning  
8 home and potentially exposing family or friends in high-risk groups to COVID-19. The UK  
9 government introduced plans for university students to receive COVID-19 tests before  
10 returning home for Christmas, which may have allayed students' worries about exposing  
11 family members to COVID-19, but was challenging for students who tested positive and were  
12 required to isolate.  
13  
14

15  
16 Several students at expressed concern about the impact of the pandemic on their finances. A  
17 smaller proportion of Oxford students reported these concerns compared to Queen's students,  
18 which may be associated with differences in year of study and concerns about employment  
19 after graduation. Our qualitative analysis supported the contribution of mandatory continued  
20 payment for university accommodation and tuition with reduced perceived value, and loss of  
21 income to financial anxiety.[20] Additionally, many students rely on their ability to work  
22 part-time or seasonally, or money from family members whose income may have been  
23 negatively affected by the pandemic. Previous studies have indicated student concern about  
24 finances during COVID-19, particularly those remaining in student residences during  
25 lockdown.[21]  
26  
27

28  
29 Most students indicated that COVID-19 negatively impacted their studies, as may be  
30 expected due to online learning or course suspension. Negative perceptions of online learning  
31 suggest dissatisfaction with alternative teaching methods, which may be worsened by  
32 unchanged tuition fees and how quickly these changes were introduced. However, most  
33 Queen's students reported little impact on grades, suggesting disruption is accounted for in  
34 assessments, that students and/or professors are adapting to maintain grades, or it is too early  
35 to measure the impact on academic performance. Negative perceptions of online learning  
36 were lower in the Oxford sample than in Queen's students (30.9% vs 61.2%). This could  
37 reflect the move to online learning in Oxford taking place when the majority of first year  
38 students would ordinarily have been sitting exams. The tutorial system at Oxford may also be  
39 more readily transferred online. Finally, on-line learning may have been more prevalent at  
40 Oxford pre-pandemic, requiring less adjustment for teaching to move fully online during the  
41 pandemic. Nearly 30% of Queen's students and 15% of Oxford students reported a negative  
42 impact on their plans to continue at university. This may suggest students are more likely to  
43 discontinue their studies due to the pandemic, and would have significant repercussions for  
44 universities' income. Most students also reported a negative impact on their prospects for  
45 summer internships, employment, learning exchanges, and other academic pursuits.  
46 Explanations include travel restrictions, workplace closures, reluctance to employ non-  
47 essential workers, social distancing restrictions, and student concerns regarding COVID-19  
48 exposure. Students' worries surrounding future academic and career prospects might be  
49 related to fewer opportunities compared to their predecessors, and increased competition on  
50 graduation with less work or academic experience. Reassuringly, most students reported no  
51 impact on their ability to access food and other essentials.  
52  
53  
54

55  
56 Students reported both positive and negative impacts on exercise. Disruption to routines,  
57 closure of gyms or lack of university sports societies cited in our qualitative analysis may  
58 account for the negative impact. More time to exercise, availability of online classes, and  
59 more space for exercise at home may account for the positive impact. Most students reported  
60

## COVID-19 Impact on University Students

a negative impact on their participation in hobbies and leisure activities, and unsurprisingly, on their social life. The combination of these factors suggests a significant impact of COVID-19 on student mental well-being, given the importance of recreation, exercise and social connectedness to the support of mental health.[13,22]

Select populations, that may not be readily identified as requiring tailored support, reported unique challenges. Students with dependents described challenges balancing their studies and caring responsibilities due to reduced childcare services and closure of schools. International students reported inability to travel home to visit family and friends, and anxiety surrounding remaining in a foreign country during a pandemic. Affordability of remaining away from home, high tuition costs, and lack of financial support were concerns for these students.

Strengths of our study include providing timely, important information on a largely unknown and highly relevant topic: the impact of a global pandemic on the lives and experiences of university students. Responses from large, diverse samples of university students were utilized and allowed comparison between countries and institutions. Our findings build on those of previous studies that have focused specifically on mental health impacts,[15,23-25] or been limited to medical students or much smaller samples.[26-31] We assessed the impact of COVID-19 using a validated Pandemic Anxiety Scale.

One study limitation relates to the low response rate in the Queen's sample, which likely reflects the timing of the survey during summer break without a preceding student engagement campaign. Nonetheless, the student sample appeared broadly representative of the Queen's undergraduate population in terms of demographics and program of study. Secondly the Oxford data pertains only to first-year students and served as a descriptive exploratory analysis to compliment the Canadian data. Differing pandemic responses may have impacted comparability across the universities, but the overall consistency of the findings strengthens our conclusions and their generalisability. The increased surveying of younger Oxford students may be more informative for higher education policies, as these students are more likely to be at university when these policies are enacted. In this analysis, students at both universities were surveyed early in the pandemic, and worries and impacts may change over the course of the pandemic. Therefore, we will repeatedly survey students at both universities to better understand student concerns and the impact of the pandemic on student experiences and well-being over time. We hope that this information will help to inform universities regarding how best to address student priority learning and well-being needs.

## 5 Conclusion

The COVID-19 pandemic has had wide-ranging impacts on university student experience and mental health. Our findings support that undergraduate students have concerns regarding disruptions to university studies, the inadequacies of online learning as a substitute for in-person learning, and their finances and future academic and career prospects. A concerning number of students reported the possibility of discontinuing their studies due to the pandemic. Many students reported negative impacts of COVID-19 on protective factors for well-being, including socializing, exercise, hobbies and leisure activities, family relationships, and mental health support. Higher education institutions must prepare to address students' concerns in the short term during the pandemic, and provide ongoing support for students in the aftermath of COVID-19 as the long-term impacts become apparent.

COVID-19 Impact on University Students

1  
2  
3  
4  
5  
6  
7  
8  
9  
10  
11  
12  
13  
14  
15  
16  
17  
18  
19  
20  
21  
22  
23  
24  
25  
26  
27  
28  
29  
30  
31  
32  
33  
34  
35  
36  
37  
38  
39  
40  
41  
42  
43  
44  
45  
46  
47  
48  
49  
50  
51  
52  
53  
54  
55  
56  
57  
58  
59  
60

For peer review only

## COVID-19 Impact on University Students

### Figure legends

Figure 1: Queen's university students' (n=3,013) responses to the Pandemic Anxiety Scale items (Panel A), and items relating to the impact that COVID-19 and associated social distancing have had on various aspects of their lives (Panel B).

Figure 2: Oxford University first-year undergraduate students' (n=339) responses to the Pandemic Anxiety Scale items (Panel A), and items relating to the impact that COVID-19 and associated social distancing have had on various aspects of their lives (Panel B).

### Contributors

AD developed the protocol in collaboration with colleagues including KEAS and students including DR, NK and SC. DR led the student engagement campaign at Queen's and SC and AD the survey launch, while CK supervised by AD and KEAS led the engagement and survey launch at Oxford. JA, NK and AD led the quantitative analysis, whilst KEAS, AB, JB and DR the qualitative analysis. All named authors contributed to the writing and reviewed the final manuscript.

### Acknowledgments

We acknowledge the important role of the student volunteers who worked on the Queen's Student Engagement campaign including Mimi Li and Anjalika Khan.

KEAS is supported by the NIHR Oxford Health Biomedical Research Centre (grant BRC-1215-20005).

### Competing interests

KEAS is supported by the NIHR Oxford Health Biomedical Research Centre (grant BRC-1215-20005). The views expressed are those of the authors and not necessarily those of the UK National Health Service, the National Institute for Health Research, or the UK Department of Health.

### Funding

This study was funded by an operating grant from the Canadian Institutes of Health Research (CIHR) PJT 165597.

### Data sharing statement

Deidentified raw data is available upon reasonable request to the corresponding author.

### Ethical approval

Ethical approval was obtained from the Central University Research Ethics Committee in Oxford (R60998 – RE001), and the Queens University Health Sciences and Affiliated Teaching Hospitals Research Ethics Board (HSREB) in Canada (PSIY-669-19). Participants gave informed consent as part of the survey.

## COVID-19 Impact on University Students

## References

- [1] Adhikari, S. P., Meng, S., Wu, Y. J., Mao, Y. P., Ye, R. X., Wang, Q. Z., et al. (2020). Epidemiology, causes, clinical manifestation and diagnosis, prevention and control of coronavirus disease (COVID-19) during the early outbreak period: a scoping review. *Infectious diseases of poverty*, 9(1), 29. <https://doi.org/10.1186/s40249-020-00646-x>
- [2] Pfefferbaum, B., & North, C. (2020). Mental health and the Covid-19 pandemic. *New England Journal of Medicine*, 383(6): 510–12. <https://doi.org/10.1056/nejmp2013466>.
- [3] Crawford, J., Butler-Henderson, K., Rudolph, J., Malkawi, B., Glowatz, M., Magni, P et al. (2020). COVID-19: 20 countries' higher education intra-period digital pedagogy responses. *Journal of Applied Learning & Teaching*, 3(1). <https://doi.org/10.37074/jalt.2020.3.1.7>
- [4] King, N., Pickett, W., McNevin, S., Bowie, C., Rivera, D., Keown-Stoneman, C., et al. (2020). Mental health need of students at entry to university: Baseline findings from the U-Flourish Student Well-Being and Academic Success Study. *Early Intervention in Psychiatry*, 1–10. <https://doi.org/10.1111/eip.12939>
- [5] Duffy, A., Keown-Stoneman, C., Goodday, S., Horrocks, J., Lowe, M., King, N, et al. (2020). Predictors of mental health and academic outcomes in first-year university students: Identifying prevention and early-intervention targets. *BJPsych open*, 6(3), e46. <https://doi.org/10.1192/bjo.2020.24>
- [6] Goodday SM, Rivera D, Foran H, et al. (2019). U-Flourish university students well-being and academic success longitudinal study: a study protocol. *BMJ Open*, 9:e029854. doi:10.1136/bmjopen-2019-029854
- [7] McElroy, E., Patalay, P., Moltrecht, B., Shevlin, M., Shum, A., Creswell, C., et al. (2020). Demographic and health factors associated with pandemic anxiety in the context of COVID-19. *British journal of health psychology*, 25(4), 934–944. <https://doi.org/10.1111/bjhp.12470>
- [8] RStudio Team (2020). RStudio: Integrated Development for R. RStudio, PBC, Boston, MA URL <http://www.rstudio.com/>.
- [9] Ritchie, J. & Spencer, L. 1994. Qualitative data analysis for applied policy research by Jane Ritchie and Liz Spencer in A. Bryman and R. G. Burgess [eds.] 'Analysing qualitative data', (pp.173-194). London: Routledge.
- [10] Gale, N. K., Heath, G., Cameron, E., Rashid, S. & Redwood, S. (2013). Using the framework method for the analysis of qualitative data in multi-disciplinary health research. *BMC Medical Research Methodology*, 13:117. <https://doi.org/10.1186/1471-2288-13-117>
- [11] von Elm E, Altman DG, Egger M, Pocock SJ, Gotsche PC, Vandenbroucke JP. 2007. The Strengthening the Reporting of Observational Studies in Epidemiology (STROBE) Statement: guidelines for reporting observational studies. *BMJ*, 335 doi: <https://doi.org/10.1136/bmj.39335.541782.AD>

## COVID-19 Impact on University Students

[12]McManus, S., Bebbington, P. E., Jenkins, R., Morgan, Z., Brown, L., Collinson, D., et al. (2020). Data Resource Profile: Adult Psychiatric Morbidity Survey (APMS). *International journal of epidemiology*, 49(2), 361–362e. <https://doi.org/10.1093/ije/dyz224>

[13]Xiong, J., Lipsitz, O., Nasri, F., Lui, L., Gill, H., Phan, L., et al. (2020). Impact of COVID-19 pandemic on mental health in the general population: A systematic review. *Journal of affective disorders*, 277, 55–64. <https://doi.org/10.1016/j.jad.2020.08.001>

[14]Smith, L., Jacob, L., Yakkundi, A., McDermott, D., Armstrong, N. C., Barnett, Y., et al. (2020). Correlates of symptoms of anxiety and depression and mental wellbeing associated with COVID-19: a cross-sectional study of UK-based respondents. *Psychiatry research*, 291, 113138. <https://doi.org/10.1016/j.psychres.2020.113138>

[15]Elmer, T., K. Mepham, and C. Stadtfeld. 2020. Students under Lockdown: Comparisons of Students' Social Networks and Mental Health before and during the COVID-19 Crisis in Switzerland. *PloS one*, 15 (7): e0236337. <https://doi.org/10.1371/journal.pone.0236337>

[16]Guzek, D., Skolmowska, D., & Głabska, D. (2020). Analysis of Gender-Dependent Personal Protective Behaviors in a National Sample: Polish Adolescents' COVID-19 Experience (PLACE-19) Study. *International journal of environmental research and public health*, 17(16), 5770. <https://doi.org/10.3390/ijerph17165770>

[17]Statistics Canada. 2020. Canadian Economic Dashboard and COVID-19 <https://www150.statcan.gc.ca/n1/pub/71-607-x/71-607-x2020009-eng.htm> [Accessed 31st October 2020]

[18]Office for National Statistics. 2020. Coronavirus (COVID-19) roundup: Economy, business and jobs. <https://www.ons.gov.uk/peoplepopulationandcommunity/healthandsocialcare/conditionsanddiseases/articles/coronaviruscovid19roundupeconomybusinessandjobs/2020-07-02#youngperson> [Accessed 31<sup>st</sup> October 2020]

[19]Clift, A.K., Coupland, C.A.C., Keogh, R.H., Diaz-Ordaz, K., Williamson, E. (2020). Living risk prediction algorithm (QCOVID) for risk of hospital admission and mortality from coronavirus 19 in adults: national derivation and validation cohort study. *BMJ*, 371, pp. m3731. <https://doi.org/10.1136/bmj.m3731>

[20]Office for National Statistics. 2020. Labour market overview, UK: October 2020. <https://www.ons.gov.uk/employmentandlabourmarket/peopleinwork/employmentandemployeetypes/bulletins/uklabourmarket/october2020> [Accessed 31st October 2020]

[21]Husky, M., Kovess-Masfety, V., & Swendsen, J. (2020). Stress and anxiety among university students in France during Covid-19 mandatory confinement. *Compr. Psychiatry* **102**, 152-191. doi: 10.1016/j.comppsy.2020.152191

[22]Rastegar Kazerooni, A., Amini, M., Tabari, P., & Moosavi, M. (2020). Peer mentoring for medical students during the COVID-19 pandemic via a social media platform. *Medical education*, 54(8), 762–763. <https://doi.org/10.1111/medu.14206>

[23]Copeland, William E., Ellen McGinnis, Yang Bai, Zoe Adams, Hilary Nardone, Vinay Devadanam, Jeffrey Rettew, and Jim J. Hudziak. 2021. Impact of COVID-19 Pandemic on College Student Mental Health and Wellness. *Journal of the American Academy of Child &*

## COVID-19 Impact on University Students

*Adolescent Psychiatry*, 60 (1): 134-141.e2.

<https://doi.org/https://doi.org/10.1016/j.jaac.2020.08.466>.

[24]Essadek, A., and T. Rabeyron. 2020. Mental Health of French Students during the Covid-19 Pandemic. *Journal of affective disorders*, 277 (December): 392–93. [https://doi.org/S0165-0327\(20\)32648-3](https://doi.org/S0165-0327(20)32648-3)

[25]Wathelet, M., S. Duhem, G. Vaiva, T. Baubet, E. Habran, E. Veerapa, C. Debien, et al. 2020. Factors Associated With Mental Health Disorders Among University Students in France Confined During the COVID-19 Pandemic. *JAMA network open*, 3 (10): e2025591. <https://doi.org/10.1001/jamanetworkopen.2020.25591> [doi].

[26]Alsoufi, A., A. Alsuyihili, A. Msherghi, A. Elhadi, H. Atiyah, A. Ashini, A. Ashwieb, et al. 2020. Impact of the COVID-19 Pandemic on Medical Education: Medical Students' Knowledge, Attitudes, and Practices Regarding Electronic Learning. *PloS one*, 15 (11): e0242905. <https://doi.org/10.1371/journal.pone.0242905> [doi].

[27]Byrnes, Y. M., A. M. Civantos, B. C. Go, T. L. McWilliams, and K. Rajasekaran. 2020. Effect of the COVID-19 Pandemic on Medical Student Career Perceptions: A National Survey Study. *Medical education online*, 25 (1): 1798088. <https://doi.org/10.1080/10872981.2020.1798088> [doi].

[28]Choi, B., L. Jegatheeswaran, A. Minocha, M. Alhilani, M. Nakhoul, and E. Mutengesa. 2020. The Impact of the COVID-19 Pandemic on Final Year Medical Students in the United Kingdom: A National Survey. *BMC medical education*, 20 (1): 206-020-02117–1. <https://doi.org/10.1186/s12909-020-02117-1> [doi].

[29]Keckojevic, A., C. H. Basch, M. Sullivan, and N. K. Davi. 2020. The Impact of the COVID-19 Epidemic on Mental Health of Undergraduate Students in New Jersey, Cross-Sectional Study. *PloS one*, 15 (9): e0239696. <https://doi.org/10.1371/journal.pone.0239696> [doi].

[30]Lyons, Z., H. Wilcox, L. Leung, and O. Dearsley. 2020. COVID-19 and the Mental Well-Being of Australian Medical Students: Impact, Concerns and Coping Strategies Used. *Australasian psychiatry : bulletin of Royal Australian and New Zealand College of Psychiatrists*, 28 (6): 649–52. <https://doi.org/10.1177/1039856220947945> [doi].

[31]Son, C., S. Hegde, A. Smith, X. Wang, and F. Sasangohar. 2020. Effects of COVID-19 on College Students' Mental Health in the United States: Interview Survey Study. *Journal of medical Internet research*, 22 (9): e21279. <https://doi.org/10.2196/21279> [doi].

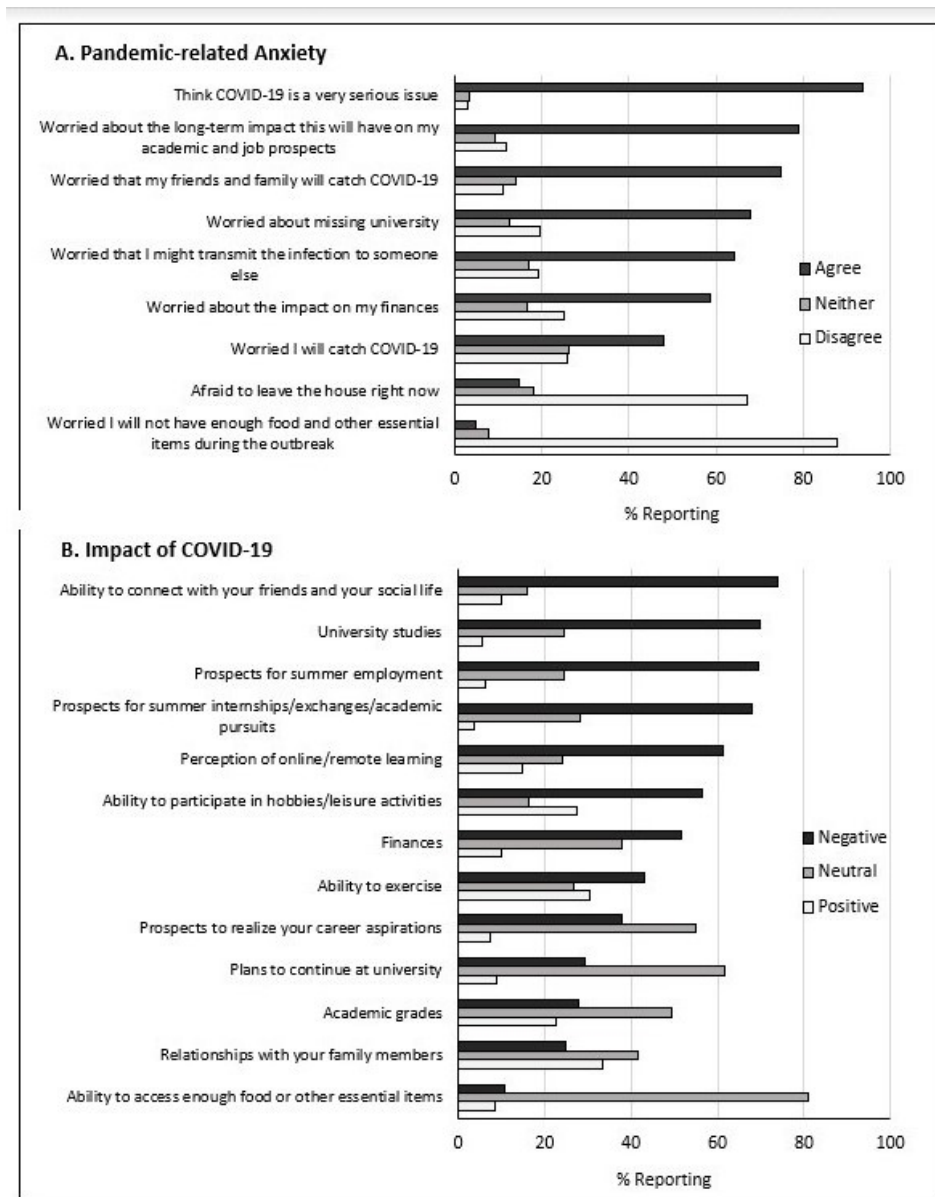

45 Figure 1: Queen's university students' (n=3,013) responses to the Pandemic Anxiety Scale items (Panel A),  
46 and items relating to the impact that COVID-19 and associated social distancing have had on various  
47 aspects of their lives (Panel B).

48 155x197mm (96 x 96 DPI)



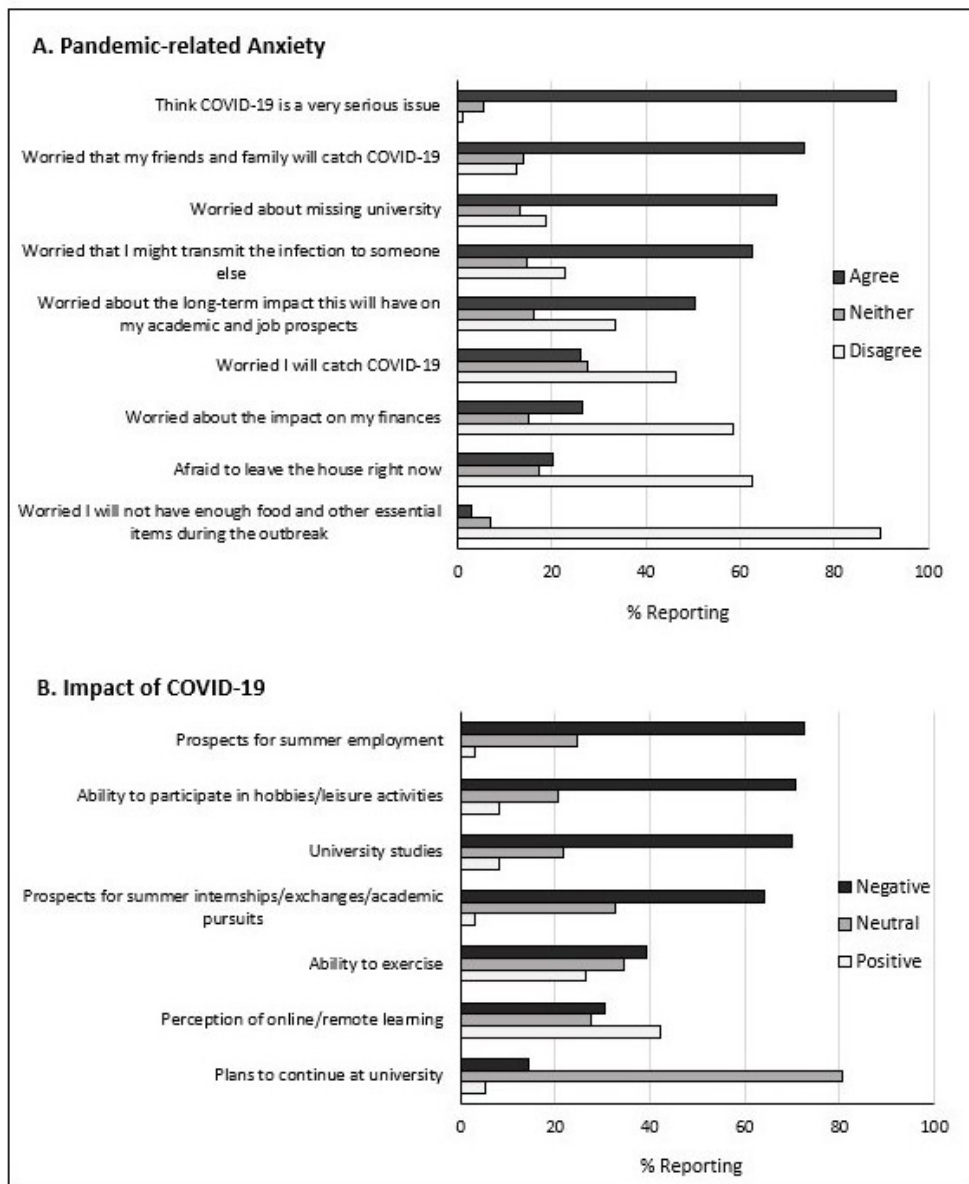

Figure 2. Oxford University first-year undergraduate students' (n= 339) responses to the Pandemic Anxiety Scale items (Panel A), and items relating to the impact that COVID-19 and associated social distancing have had on various aspects of their lives (Panel B).

152x182mm (96 x 96 DPI)

**Supplemental Table 1.** Oxford University first-year student percentage ratings on the COVID-19 Pandemic Anxiety Scale items overall and by gender

|                                                                                        | TOTAL<br>(n=339)* | GENDER          |                   | p**    |
|----------------------------------------------------------------------------------------|-------------------|-----------------|-------------------|--------|
|                                                                                        |                   | Male<br>(n=121) | Female<br>(n=209) |        |
| Think COVID-19 is a very serious issue                                                 |                   |                 |                   |        |
| Agree                                                                                  | 93.2              | 89.3            | 95.2              | 0.02   |
| Neutral                                                                                | 5.6               | 7.4             | 4.8               |        |
| Disagree                                                                               | 1.2               | 3.3             | 0                 |        |
| Worried that I will catch COVID-19                                                     |                   |                 |                   |        |
| Agree                                                                                  | 26.0              | 16.5            | 31.1              | 0.01   |
| Neutral                                                                                | 27.7              | 26.4            | 28.2              |        |
| Disagree                                                                               | 46.3              | 57.0            | 40.7              |        |
| Worried friends and family will catch COVID-19                                         |                   |                 |                   |        |
| Agree                                                                                  | 73.7              | 60.3            | 81.3              | <0.001 |
| Neutral                                                                                | 13.9              | 20.7            | 10.0              |        |
| Disagree                                                                               | 12.4              | 19.0            | 8.6               |        |
| I am afraid to leave the house right now                                               |                   |                 |                   |        |
| Agree                                                                                  | 20.1              | 10.7            | 24.4              | 0.004  |
| Neutral                                                                                | 17.4              | 15.7            | 18.7              |        |
| Disagree                                                                               | 62.5              | 73.6            | 56.9              |        |
| I am worried that I might transmit the infection to someone else                       |                   |                 |                   |        |
| Agree                                                                                  | 62.5              | 52.9            | 68.4              | 0.02   |
| Neutral                                                                                | 14.7              | 19.0            | 12.4              |        |
| Disagree                                                                               | 22.7              | 28.1            | 19.1              |        |
| I am worried I will not have enough food and other essential items during the outbreak |                   |                 |                   |        |
| Agree                                                                                  | 2.9               | 1.7             | 3.3               | 0.53   |
| Neutral                                                                                | 7.1               | 8.3             | 6.2               |        |
| Disagree                                                                               | 90.0              | 90.1            | 90.4              |        |
| I am worried about missing university                                                  |                   |                 |                   |        |
| Agree                                                                                  | 67.8              | 62.8            | 69.9              | 0.47   |
| Neutral                                                                                | 13.3              | 15.7            | 12.4              |        |
| Disagree                                                                               | 18.6              | 20.7            | 17.7              |        |
| I am worried about the impact on my finances                                           |                   |                 |                   |        |
| Agree                                                                                  | 26.5              | 19.0            | 31.6              | 0.04   |
| Neutral                                                                                | 15.0              | 15.7            | 14.8              |        |
| Disagree                                                                               | 58.4              | 65.3            | 53.6              |        |
| I am worried about the long-term impact on my academic and job prospects               |                   |                 |                   |        |
| Agree                                                                                  | 50.4              | 39.7            | 54.5              | 0.03   |
| Neutral                                                                                | 16.2              | 19.8            | 14.8              |        |
| Disagree                                                                               | 33.3              | 40.5            | 30.6              |        |

Notes: (1) \*not all participants reported gender, (2) \*\*p-value for chi-square test

**Supplemental Table 2.** Oxford University first-year student percentage reporting overall and by gender. *Could you describe the impact that the COVID-19 pandemic and associated social distancing have had on:*

|                                                                        | TOTAL<br>(n=339)* | GENDER          |                   | p**    |
|------------------------------------------------------------------------|-------------------|-----------------|-------------------|--------|
|                                                                        |                   | Male<br>(n=121) | Female<br>(n=209) |        |
| Your university studies?                                               |                   |                 |                   |        |
| Negative                                                               | 69.9              | 70.2            | 69.4              | 0.90   |
| Neutral                                                                | 21.8              | 20.7            | 22.5              |        |
| Positive                                                               | 8.3               | 9.1             | 8.1               |        |
| Your plans to continue at university?                                  |                   |                 |                   |        |
| Negative                                                               | 14.2              | 5.0             | 19.6              | <0.001 |
| Neutral                                                                | 80.5              | 90.9            | 74.2              |        |
| Positive                                                               | 5.3               | 4.1             | 6.2               |        |
| Your perception of online/remote learning                              |                   |                 |                   |        |
| Negative                                                               | 30.4              | 25.6            | 33.5              | 0.046  |
| Neutral                                                                | 27.4              | 34.7            | 22.5              |        |
| Positive                                                               | 42.2              | 39.7            | 44.0              |        |
| Your prospects for summer internships/exchanges/academic pursuits?     |                   |                 |                   |        |
| Negative                                                               | 64.0              | 62.0            | 64.1              | 0.33   |
| Neutral                                                                | 32.7              | 36.4            | 31.6              |        |
| Positive                                                               | 3.2               | 1.7             | 4.3               |        |
| Your prospects for summer employment?                                  |                   |                 |                   |        |
| Negative                                                               | 72.6              | 63.6            | 77.5              | 0.02   |
| Neutral                                                                | 24.5              | 31.4            | 20.6              |        |
| Positive                                                               | 2.9               | 5.0             | 1.9               |        |
| Your ability to exercise?                                              |                   |                 |                   |        |
| Negative                                                               | 39.2              | 43.8            | 37.3              | 0.17   |
| Neutral                                                                | 34.5              | 35.5            | 32.5              |        |
| Positive                                                               | 26.3              | 20.7            | 30.1              |        |
| Your ability to participate in your usual hobbies/ leisure activities? |                   |                 |                   |        |
| Negative                                                               | 70.8              | 67.8            | 73.2              | 0.49   |
| Neutral                                                                | 20.6              | 24.0            | 18.7              |        |
| Positive                                                               | 8.3               | 7.4             | 8.1               |        |

Notes: (1) \*not all participants reported gender, (2) \*\*p-value for chi-square test

**Supplemental Materials Appendix A1: Quotes from qualitative data analysis of free text responses***Social isolation*

“I highly depend on social environments to support my mental health, so not being able to see friends is quite challenging as it makes my depression worse”

“Forced separation from part of my support system has had a negative impact on both my academics and mental health”

“Impacts of the pandemic on family members have reverberating effects to all members of household”

“Being stuck in a house with my parents has negatively impacted my mental health”

“I have to be near my emotionally abusive mother, I self harm a lot more now and I really need access to university student wellness center but I cannot call them while here”

“I've been feeling more lonely and restless with the pandemic going on. There are less outlets to relax due to isolation (ie sports leagues, meeting with friends, etc.)”

“As much as I would sometimes find social interaction difficult and draining, being starved of it is definitely having a negative impact on my mental health.”

“Not being able to meet up with friends in person has been somewhat of a blow to mental health”

“Not being able to see my partner has had a significant impact on my mental health.”

“Having no break from my fairly stressful home situation has not been great for my mental health”

“I find being stuck inside with my family is very stressful and it leaves me sometimes feeling unable to work which compounds the already existing stress about work and it often becomes a cycle I find difficult to break”

*Work adaptation*

“Living and working in the same place is a struggle. I am concerned about this going into another year of school with little opportunity for in person learning or access to on campus study spaces.

I am nervous about completing my final year of my undergraduate degree remotely, as my program is very lab-based.”

“I am finding it hard to keep a balanced perspective on work and assignments working at home by myself and not being around friends.”

“Getting myself into an exam or essay-writing mindset at home is much harder than I thought it would be.”

“I am much less motivated to do my university assignments when I am home compared to when I am at university”

### *Coping skills*

“I have found that with the pandemic and social distancing requirements I have had more difficulty than normal maintaining my mental wellness. I have struggled with some anxiety at several points in the past few months as I haven't have school or work to focus on, and small problems are exacerbated as they are taking up more focus.”

“It's devastating that we won't get a normal orientation week or first year, but I do understand that Queen's is doing everything they can to try and make it better.”

“Severely imparts my ability to spend time outdoors and with my friends, things like rock climbing and hiking and yoga, which are all very important to maintaining my mental health and managing anxiety. It's been a lot harder to deal with in the absence of these things. School was much more stressful online without support of classmates and less connection to professors.”

“It has removed my ability to train for my sport which was a crucial part of my weekly structure 6 days a week, and was critical in my being able to maintain my mental health and work/study productively”

### *Unique populations*

“I have been too scared to see my doctor about my physical digestive health issues and they have gotten much worse. I will likely need a lot of treatment when this is all over. I'm too scared to go to a hospital or doctors office because of the virus at the moment as I live with vulnerable individuals”

“Too afraid to visit hospital for routine problems.”

“I lost my childcare for two children under 3. Completing online synchronous school while my partner works long hours in the emergency department, and having no help from family because of COVID-19 has left me feeling overwhelmed, un-engaged, frustrated, and easily angered. It has impacted my relationship with my partner and to some extent my self worth as I am being forced to be a stay-at-home mother and student and am unsure if I'll be able to work which gives me a lot of fulfillment, and much needed mental stimulation.”

“Trying to juggle dependents alone while in school, as my spouse continues to work”

“Being an international student, I couldn't go back home due to the pandemic. As a result I am all alone. It's lonely and i get restless at times. all this negatively affects by study”

“Not being able to go home as an international student, it was scary to be in this situation in another country”

“Local regulations on flights and exit and entry make international travel difficult, and this also results in the increase in the price of air tickets. An one-way ticket from Canada to China is above 7000 dollars, which is not affordable for me.”

“As an international student, I had trouble coming back home, which caused severe stress and started a period of worse mental health for me.”

# Reporting checklist for cross sectional study.

Based on the STROBE cross sectional guidelines.

|                           |                     | Reporting Item                                                                                                                  | Page Number |
|---------------------------|---------------------|---------------------------------------------------------------------------------------------------------------------------------|-------------|
| <b>Title and abstract</b> |                     |                                                                                                                                 |             |
| Title                     | <a href="#">#1a</a> | Indicate the study's design with a commonly used term in the title or the abstract                                              | 1           |
| Abstract                  | <a href="#">#1b</a> | Provide in the abstract an informative and balanced summary of what was done and what was found                                 | 1           |
| <b>Introduction</b>       |                     |                                                                                                                                 |             |
| Background / rationale    | <a href="#">#2</a>  | Explain the scientific background and rationale for the investigation being reported                                            | 2           |
| Objectives                | <a href="#">#3</a>  | State specific objectives, including any prespecified hypotheses                                                                | 1,2         |
| <b>Methods</b>            |                     |                                                                                                                                 |             |
| Study design              | <a href="#">#4</a>  | Present key elements of study design early in the paper                                                                         | 3           |
| Setting                   | <a href="#">#5</a>  | Describe the setting, locations, and relevant dates, including periods of recruitment, exposure, follow-up, and data collection | 3           |

|                                                                      |                            |                      |                                                                                                                                                                                                                                                                      |     |
|----------------------------------------------------------------------|----------------------------|----------------------|----------------------------------------------------------------------------------------------------------------------------------------------------------------------------------------------------------------------------------------------------------------------|-----|
| 1<br>2<br>3<br>4<br>5<br>6<br>7<br>8<br>9<br>10<br>11<br>12<br>13    | Eligibility criteria       | <a href="#">#6a</a>  | Give the eligibility criteria, and the sources and methods of selection of participants.                                                                                                                                                                             | 3   |
| 14<br>15<br>16<br>17<br>18<br>19<br>20<br>21<br>22<br>23<br>24<br>25 | Data sources / measurement | <a href="#">#8</a>   | For each variable of interest give sources of data and details of methods of assessment (measurement). Describe comparability of assessment methods if there is more than one group. Give information separately for for exposed and unexposed groups if applicable. | 3-4 |
| 26<br>27<br>28                                                       | Bias                       | <a href="#">#9</a>   | Describe any efforts to address potential sources of bias                                                                                                                                                                                                            | 3-4 |
| 29<br>30<br>31                                                       | Study size                 | <a href="#">#10</a>  | Explain how the study size was arrived at                                                                                                                                                                                                                            | 4   |
| 32<br>33<br>34<br>35<br>36<br>37<br>38<br>39                         | Quantitative variables     | <a href="#">#11</a>  | Explain how quantitative variables were handled in the analyses. If applicable, describe which groupings were chosen, and why                                                                                                                                        | 3-4 |
| 40<br>41<br>42<br>43<br>44                                           | Statistical methods        | <a href="#">#12a</a> | Describe all statistical methods, including those used to control for confounding                                                                                                                                                                                    | 3-4 |
| 45<br>46<br>47<br>48<br>49                                           | Statistical methods        | <a href="#">#12b</a> | Describe any methods used to examine subgroups and interactions                                                                                                                                                                                                      | 3-4 |
| 50<br>51<br>52<br>53<br>54                                           | Statistical methods        | <a href="#">#12c</a> | Explain how missing data were addressed                                                                                                                                                                                                                              | 3-4 |
| 55<br>56<br>57<br>58<br>59<br>60                                     | Statistical                | <a href="#">#12d</a> | If applicable, describe analytical methods taking account of                                                                                                                                                                                                         | n/a |

|    |                  |                                                                                  |              |
|----|------------------|----------------------------------------------------------------------------------|--------------|
| 1  | methods          | sampling strategy                                                                | Not done     |
| 2  |                  |                                                                                  |              |
| 3  |                  |                                                                                  |              |
| 4  | Statistical      | <a href="#">#12e</a> Describe any sensitivity analyses                           | n/a          |
| 5  |                  |                                                                                  |              |
| 6  | methods          |                                                                                  | Not done     |
| 7  |                  |                                                                                  |              |
| 8  |                  |                                                                                  |              |
| 9  |                  |                                                                                  |              |
| 10 | <b>Results</b>   |                                                                                  |              |
| 11 |                  |                                                                                  |              |
| 12 |                  |                                                                                  |              |
| 13 | Participants     | <a href="#">#13a</a> Report numbers of individuals at each stage of study—eg     | 4            |
| 14 |                  | numbers potentially eligible, examined for eligibility,                          |              |
| 15 |                  | confirmed eligible, included in the study, completing follow-                    |              |
| 16 |                  | up, and analysed. Give information separately for for                            |              |
| 17 |                  | exposed and unexposed groups if applicable.                                      |              |
| 18 |                  |                                                                                  |              |
| 19 |                  |                                                                                  |              |
| 20 |                  |                                                                                  |              |
| 21 |                  |                                                                                  |              |
| 22 |                  |                                                                                  |              |
| 23 |                  |                                                                                  |              |
| 24 |                  |                                                                                  |              |
| 25 | Participants     | <a href="#">#13b</a> Give reasons for non-participation at each stage            | 4            |
| 26 |                  |                                                                                  |              |
| 27 |                  |                                                                                  |              |
| 28 | Participants     | <a href="#">#13c</a> Consider use of a flow diagram                              | n/a          |
| 29 |                  |                                                                                  |              |
| 30 |                  |                                                                                  |              |
| 31 |                  |                                                                                  |              |
| 32 |                  |                                                                                  | Described in |
| 33 |                  |                                                                                  | prose        |
| 34 |                  |                                                                                  |              |
| 35 |                  |                                                                                  |              |
| 36 |                  |                                                                                  |              |
| 37 | Descriptive data | <a href="#">#14a</a> Give characteristics of study participants (eg demographic, | 4-5          |
| 38 |                  | clinical, social) and information on exposures and potential                     |              |
| 39 |                  | confounders. Give information separately for exposed and                         |              |
| 40 |                  | unexposed groups if applicable.                                                  |              |
| 41 |                  |                                                                                  |              |
| 42 |                  |                                                                                  |              |
| 43 |                  |                                                                                  |              |
| 44 |                  |                                                                                  |              |
| 45 |                  |                                                                                  |              |
| 46 |                  |                                                                                  |              |
| 47 | Descriptive data | <a href="#">#14b</a> Indicate number of participants with missing data for each  | 4            |
| 48 |                  | variable of interest                                                             |              |
| 49 |                  |                                                                                  |              |
| 50 |                  |                                                                                  |              |
| 51 |                  |                                                                                  |              |
| 52 | Outcome data     | <a href="#">#15</a> Report numbers of outcome events or summary measures.        | 5-8          |
| 53 |                  | Give information separately for exposed and unexposed                            |              |
| 54 |                  | groups if applicable.                                                            |              |
| 55 |                  |                                                                                  |              |
| 56 |                  |                                                                                  |              |
| 57 |                  |                                                                                  |              |
| 58 |                  |                                                                                  |              |
| 59 |                  |                                                                                  |              |
| 60 |                  |                                                                                  |              |



|    |                          |                      |                                                                   |     |
|----|--------------------------|----------------------|-------------------------------------------------------------------|-----|
| 1  | Main results             | <a href="#">#16a</a> | Give unadjusted estimates and, if applicable, confounder-         | 5-7 |
| 2  |                          |                      |                                                                   |     |
| 3  |                          |                      |                                                                   |     |
| 4  |                          |                      |                                                                   |     |
| 5  |                          |                      |                                                                   |     |
| 6  |                          |                      |                                                                   |     |
| 7  |                          |                      |                                                                   |     |
| 8  |                          |                      |                                                                   |     |
| 9  |                          |                      |                                                                   |     |
| 10 | Main results             | <a href="#">#16b</a> | Report category boundaries when continuous variables              | 3,5 |
| 11 |                          |                      |                                                                   |     |
| 12 |                          |                      |                                                                   |     |
| 13 | Main results             | <a href="#">#16c</a> | If relevant, consider translating estimates of relative risk into | n/a |
| 14 |                          |                      |                                                                   |     |
| 15 |                          |                      |                                                                   |     |
| 16 |                          |                      |                                                                   |     |
| 17 |                          |                      |                                                                   |     |
| 18 |                          |                      |                                                                   |     |
| 19 | Other analyses           | <a href="#">#17</a>  | Report other analyses done—e.g., analyses of subgroups            | 3-5 |
| 20 |                          |                      |                                                                   |     |
| 21 |                          |                      |                                                                   |     |
| 22 |                          |                      |                                                                   |     |
| 23 |                          |                      |                                                                   |     |
| 24 |                          |                      |                                                                   |     |
| 25 | <b>Discussion</b>        |                      |                                                                   |     |
| 26 | Key results              | <a href="#">#18</a>  | Summarise key results with reference to study objectives          | 5-8 |
| 27 |                          |                      |                                                                   |     |
| 28 |                          |                      |                                                                   |     |
| 29 | Limitations              | <a href="#">#19</a>  | Discuss limitations of the study, taking into account sources     | 10  |
| 30 |                          |                      |                                                                   |     |
| 31 |                          |                      |                                                                   |     |
| 32 |                          |                      |                                                                   |     |
| 33 |                          |                      |                                                                   |     |
| 34 |                          |                      |                                                                   |     |
| 35 | Interpretation           | <a href="#">#20</a>  | Give a cautious overall interpretation considering                | 10  |
| 36 |                          |                      |                                                                   |     |
| 37 |                          |                      |                                                                   |     |
| 38 |                          |                      |                                                                   |     |
| 39 |                          |                      |                                                                   |     |
| 40 |                          |                      |                                                                   |     |
| 41 | Generalisability         | <a href="#">#21</a>  | Discuss the generalisability (external validity) of the study     | 10  |
| 42 |                          |                      |                                                                   |     |
| 43 |                          |                      |                                                                   |     |
| 44 |                          |                      |                                                                   |     |
| 45 |                          |                      |                                                                   |     |
| 46 |                          |                      |                                                                   |     |
| 47 | <b>Other Information</b> |                      |                                                                   |     |
| 48 |                          |                      |                                                                   |     |
| 49 |                          |                      |                                                                   |     |
| 50 |                          |                      |                                                                   |     |
| 51 |                          |                      |                                                                   |     |
| 52 |                          |                      |                                                                   |     |
| 53 |                          |                      |                                                                   |     |
| 54 |                          |                      |                                                                   |     |
| 55 |                          |                      |                                                                   |     |
| 56 |                          |                      |                                                                   |     |
| 57 |                          |                      |                                                                   |     |
| 58 |                          |                      |                                                                   |     |
| 59 |                          |                      |                                                                   |     |
| 60 |                          |                      |                                                                   |     |

1 Funding [#22](#) Give the source of funding and the role of the funders for 11  
2  
3 the present study and, if applicable, for the original study on  
4  
5 which the present article is based  
6  
7  
8  
9  
10  
11  
12  
13  
14  
15  
16  
17  
18  
19  
20  
21  
22  
23  
24  
25  
26  
27  
28  
29  
30  
31  
32  
33  
34  
35  
36  
37  
38  
39  
40  
41  
42  
43  
44  
45  
46  
47  
48  
49  
50  
51  
52  
53  
54  
55  
56  
57  
58  
59  
60

For peer review only
